# Supplementary material for: SLE-Diseaseome: A Comprehensive Meta-Database of Systemic Lupus Erythematosus Relevant Functional Pathways
Source: Research Square preprint supplement (doi:10.21203/rs.3.rs-6761810/v1), 2025-06-05
Supplement: Supplementary file 1 [file ee428bb55ecd32fbc3b2683d.xlsx]

## Sheet: SupplementaryTable1
GenesetID	Term	Round1	Round2	Cluster	Term.round1	Term.round2
LI.M2.1.split2	extracellular matrix (II)	1	1	SLED1.1	Neutrophils	Neutrophils, azurophils, basophils, eosinophils
LI.M37.0.split1	immune activation - generic cluster	1	1	SLED1.1	Neutrophils	Neutrophils, azurophils, basophils, eosinophils
LI.M114.0.split1	TBA	1	1	SLED1.1	Neutrophils	Neutrophils, azurophils, basophils, eosinophils
DC.M5.15	Neutrophils	1	1	SLED1.1	Neutrophils	Neutrophils, azurophils, basophils, eosinophils
GO:0006952.split6	defense response	1	1	SLED1.1	Neutrophils	Neutrophils, azurophils, basophils, eosinophils
GO:0022617.split3	extracellular matrix disassembly	1	1	SLED1.1	Neutrophils	Neutrophils, azurophils, basophils, eosinophils
GO:0042742.split7	defense response to bacterium	1	1	SLED1.1	Neutrophils	Neutrophils, azurophils, basophils, eosinophils
GO:0035577.split1	azurophil granule membrane	1	1	SLED1.1	Neutrophils	Neutrophils, azurophils, basophils, eosinophils
GO:0035578.split1	azurophil granule lumen	1	1	SLED1.1	Neutrophils	Neutrophils, azurophils, basophils, eosinophils
GO:0035579.split1	specific granule membrane	1	1	SLED1.1	Neutrophils	Neutrophils, azurophils, basophils, eosinophils
GO:0035580.split1	specific granule lumen	1	1	SLED1.1	Neutrophils	Neutrophils, azurophils, basophils, eosinophils
GO:1904724.split1	tertiary granule lumen	1	1	SLED1.1	Neutrophils	Neutrophils, azurophils, basophils, eosinophils
GO:0004252.split6	serine-type endopeptidase activity	1	1	SLED1.1	Neutrophils	Neutrophils, azurophils, basophils, eosinophils
GO:0008236.split8	serine-type peptidase activity	1	1	SLED1.1	Neutrophils	Neutrophils, azurophils, basophils, eosinophils
R-HSA-6798695.split5	Neutrophil degranulation	1	1	SLED1.1	Neutrophils	Neutrophils, azurophils, basophils, eosinophils
M10.4	Neutrophil activation	1	1	SLED1.1	Neutrophils	Neutrophils, azurophils, basophils, eosinophils
Basophils.split3	Basophils	1	1	SLED1.1	Neutrophils	Neutrophils, azurophils, basophils, eosinophils
CMP.split1	CMP	1	1	SLED1.1	Neutrophils	Neutrophils, azurophils, basophils, eosinophils
Eosinophils.split5	Eosinophils	1	1	SLED1.1	Neutrophils	Neutrophils, azurophils, basophils, eosinophils
LI.M105.split2	TBA	1	2	SLED1.2	Neutrophils	Neutrophil extracellular traps, phagocytic vesicles
LI.M124.split2	enriched in membrane proteins	1	2	SLED1.2	Neutrophils	Neutrophil extracellular traps, phagocytic vesicles
LI.M131.split2	TBA	1	2	SLED1.2	Neutrophils	Neutrophil extracellular traps, phagocytic vesicles
LI.M141.split1	TBA	1	2	SLED1.2	Neutrophils	Neutrophil extracellular traps, phagocytic vesicles
GO:0001878.split1	response to yeast	1	2	SLED1.2	Neutrophils	Neutrophil extracellular traps, phagocytic vesicles
GO:0002679	respiratory burst involved in defense response	1	2	SLED1.2	Neutrophils	Neutrophil extracellular traps, phagocytic vesicles
GO:0006935.split10	chemotaxis	1	2	SLED1.2	Neutrophils	Neutrophil extracellular traps, phagocytic vesicles
GO:0007157.split1	heterophilic cell-cell adhesion via plasma membrane cell adhesion molecules	1	2	SLED1.2	Neutrophils	Neutrophil extracellular traps, phagocytic vesicles
GO:0019732.split1	antifungal humoral response	1	2	SLED1.2	Neutrophils	Neutrophil extracellular traps, phagocytic vesicles
GO:0031640.split4	killing of cells of another organism	1	2	SLED1.2	Neutrophils	Neutrophil extracellular traps, phagocytic vesicles
GO:0032717.split3	negative regulation of interleukin-8 production	1	2	SLED1.2	Neutrophils	Neutrophil extracellular traps, phagocytic vesicles
GO:0051673	membrane disruption in another organism	1	2	SLED1.2	Neutrophils	Neutrophil extracellular traps, phagocytic vesicles
GO:0005796.split4	Golgi lumen	1	2	SLED1.2	Neutrophils	Neutrophil extracellular traps, phagocytic vesicles
GO:0042582	azurophil granule	1	2	SLED1.2	Neutrophils	Neutrophil extracellular traps, phagocytic vesicles
GO:0070821.split1	tertiary granule membrane	1	2	SLED1.2	Neutrophils	Neutrophil extracellular traps, phagocytic vesicles
GO:0097013	phagocytic vesicle lumen	1	2	SLED1.2	Neutrophils	Neutrophil extracellular traps, phagocytic vesicles
GO:0005506.split7	iron ion binding	1	2	SLED1.2	Neutrophils	Neutrophil extracellular traps, phagocytic vesicles
R-HSA-1566977	Fibronectin matrix formation	1	2	SLED1.2	Neutrophils	Neutrophil extracellular traps, phagocytic vesicles
R-HSA-6799990	Metal sequestration by antimicrobial proteins	1	2	SLED1.2	Neutrophils	Neutrophil extracellular traps, phagocytic vesicles
hsa04613.split4	Neutrophil extracellular trap formation	1	2	SLED1.2	Neutrophils	Neutrophil extracellular traps, phagocytic vesicles
pro_B_cells.split2	pro_B_cells	1	2	SLED1.2	Neutrophils	Neutrophil extracellular traps, phagocytic vesicles
LI.M140.split1	extracellular matrix, complement	1	3	SLED1.3	Neutrophils	Extracellular matrix
GO:0030574.split1	collagen catabolic process	1	3	SLED1.3	Neutrophils	Extracellular matrix
GO:0035987.split2	endodermal cell differentiation	1	3	SLED1.3	Neutrophils	Extracellular matrix
GO:0043388.split2	positive regulation of DNA binding	1	3	SLED1.3	Neutrophils	Extracellular matrix
GO:0150077.split2	regulation of neuroinflammatory response	1	3	SLED1.3	Neutrophils	Extracellular matrix
GO:0031012.split9	extracellular matrix	1	3	SLED1.3	Neutrophils	Extracellular matrix
WP129.split3	Matrix metalloproteinases	1	3	SLED1.3	Neutrophils	Extracellular matrix
WP4561.split2	Cell migration and invasion through p75NTR	1	3	SLED1.3	Neutrophils	Extracellular matrix
GO:0009612.split7	response to mechanical stimulus	1	4	SLED1.4	Neutrophils	Immune response and regulation
GO:0050778.split1	positive regulation of immune response	1	4	SLED1.4	Neutrophils	Immune response and regulation
GO:0031225.split1	anchored component of membrane	1	4	SLED1.4	Neutrophils	Immune response and regulation
WP1533.split3	Vitamin B12 metabolism	1	4	SLED1.4	Neutrophils	Immune response and regulation
WP4329.split1	miRNAs involvement in the immune response in sepsis	1	4	SLED1.4	Neutrophils	Immune response and regulation
LI.M3.split2	regulation of signal transduction	2	1	SLED2.1	Innate immune response, inflammation, IL1 and IL6 signaling	Fatty acid metabolis, IL17
LI.M113.split2	golgi membrane (I)	2	1	SLED2.1	Innate immune response, inflammation, IL1 and IL6 signaling	Fatty acid metabolis, IL17
GO:0001678.split3	cellular glucose homeostasis	2	1	SLED2.1	Innate immune response, inflammation, IL1 and IL6 signaling	Fatty acid metabolis, IL17
GO:0001775.split2	cell activation	2	1	SLED2.1	Innate immune response, inflammation, IL1 and IL6 signaling	Fatty acid metabolis, IL17
GO:0007140.split2	male meiotic nuclear division	2	1	SLED2.1	Innate immune response, inflammation, IL1 and IL6 signaling	Fatty acid metabolis, IL17
GO:0007623.split6	circadian rhythm	2	1	SLED2.1	Innate immune response, inflammation, IL1 and IL6 signaling	Fatty acid metabolis, IL17
GO:0007626.split5	locomotory behavior	2	1	SLED2.1	Innate immune response, inflammation, IL1 and IL6 signaling	Fatty acid metabolis, IL17
GO:0009966.split1	regulation of signal transduction	2	1	SLED2.1	Innate immune response, inflammation, IL1 and IL6 signaling	Fatty acid metabolis, IL17
GO:0014070.split2	response to organic cyclic compound	2	1	SLED2.1	Innate immune response, inflammation, IL1 and IL6 signaling	Fatty acid metabolis, IL17
GO:0030041.split3	actin filament polymerization	2	1	SLED2.1	Innate immune response, inflammation, IL1 and IL6 signaling	Fatty acid metabolis, IL17
GO:0030728.split2	ovulation	2	1	SLED2.1	Innate immune response, inflammation, IL1 and IL6 signaling	Fatty acid metabolis, IL17
GO:0035335.split1	peptidyl-tyrosine dephosphorylation	2	1	SLED2.1	Innate immune response, inflammation, IL1 and IL6 signaling	Fatty acid metabolis, IL17
GO:0043507.split5	positive regulation of JUN kinase activity	2	1	SLED2.1	Innate immune response, inflammation, IL1 and IL6 signaling	Fatty acid metabolis, IL17
GO:0045348.split2	positive regulation of MHC class II biosynthetic process	2	1	SLED2.1	Innate immune response, inflammation, IL1 and IL6 signaling	Fatty acid metabolis, IL17
GO:0045663.split3	positive regulation of myoblast differentiation	2	1	SLED2.1	Innate immune response, inflammation, IL1 and IL6 signaling	Fatty acid metabolis, IL17
GO:0045741.split2	positive regulation of epidermal growth factor-activated receptor activity	2	1	SLED2.1	Innate immune response, inflammation, IL1 and IL6 signaling	Fatty acid metabolis, IL17
GO:0046326.split1	positive regulation of glucose import	2	1	SLED2.1	Innate immune response, inflammation, IL1 and IL6 signaling	Fatty acid metabolis, IL17
GO:0097192.split5	extrinsic apoptotic signaling pathway in absence of ligand	2	1	SLED2.1	Innate immune response, inflammation, IL1 and IL6 signaling	Fatty acid metabolis, IL17
GO:0005575.split13	cellular_component	2	1	SLED2.1	Innate immune response, inflammation, IL1 and IL6 signaling	Fatty acid metabolis, IL17
GO:0005923.split4	bicellular tight junction	2	1	SLED2.1	Innate immune response, inflammation, IL1 and IL6 signaling	Fatty acid metabolis, IL17
GO:0031463.split3	Cul3-RING ubiquitin ligase complex	2	1	SLED2.1	Innate immune response, inflammation, IL1 and IL6 signaling	Fatty acid metabolis, IL17
GO:0003953.split3	NAD+ nucleosidase activity	2	1	SLED2.1	Innate immune response, inflammation, IL1 and IL6 signaling	Fatty acid metabolis, IL17
GO:0004721.split4	phosphoprotein phosphatase activity	2	1	SLED2.1	Innate immune response, inflammation, IL1 and IL6 signaling	Fatty acid metabolis, IL17
GO:0004722.split3	protein serine/threonine phosphatase activity	2	1	SLED2.1	Innate immune response, inflammation, IL1 and IL6 signaling	Fatty acid metabolis, IL17
GO:0016787.split3	hydrolase activity	2	1	SLED2.1	Innate immune response, inflammation, IL1 and IL6 signaling	Fatty acid metabolis, IL17
GO:0030165.split3	PDZ domain binding	2	1	SLED2.1	Innate immune response, inflammation, IL1 and IL6 signaling	Fatty acid metabolis, IL17
R-HSA-181438.split2	Toll Like Receptor 2 (TLR2) Cascade	2	1	SLED2.1	Innate immune response, inflammation, IL1 and IL6 signaling	Fatty acid metabolis, IL17
R-HSA-196849.split1	Metabolism of water-soluble vitamins and cofactors	2	1	SLED2.1	Innate immune response, inflammation, IL1 and IL6 signaling	Fatty acid metabolis, IL17
R-HSA-199220.split1	Vitamin B5 (pantothenate) metabolism	2	1	SLED2.1	Innate immune response, inflammation, IL1 and IL6 signaling	Fatty acid metabolis, IL17
R-HSA-9020702.split2	Interleukin-1 signaling	2	1	SLED2.1	Innate immune response, inflammation, IL1 and IL6 signaling	Fatty acid metabolis, IL17
hsa04015.split5	Rap1 signaling pathway	2	1	SLED2.1	Innate immune response, inflammation, IL1 and IL6 signaling	Fatty acid metabolis, IL17
hsa04071.split3	Sphingolipid signaling pathway	2	1	SLED2.1	Innate immune response, inflammation, IL1 and IL6 signaling	Fatty acid metabolis, IL17
hsa04664.split4	Fc epsilon RI signaling pathway	2	1	SLED2.1	Innate immune response, inflammation, IL1 and IL6 signaling	Fatty acid metabolis, IL17
hsa05133.split2	Pertussis	2	1	SLED2.1	Innate immune response, inflammation, IL1 and IL6 signaling	Fatty acid metabolis, IL17
WP2112.split1	IL-17 signaling pathway	2	1	SLED2.1	Innate immune response, inflammation, IL1 and IL6 signaling	Fatty acid metabolis, IL17
WP3614.split4	Photodynamic therapy-induced HIF-1 survival signaling	2	1	SLED2.1	Innate immune response, inflammation, IL1 and IL6 signaling	Fatty acid metabolis, IL17
WP4321.split4	Thermogenesis	2	1	SLED2.1	Innate immune response, inflammation, IL1 and IL6 signaling	Fatty acid metabolis, IL17
WP4685.split4	Melanoma	2	1	SLED2.1	Innate immune response, inflammation, IL1 and IL6 signaling	Fatty acid metabolis, IL17
WP4723.split2	Omega-3 / omega-6 fatty acid synthesis	2	1	SLED2.1	Innate immune response, inflammation, IL1 and IL6 signaling	Fatty acid metabolis, IL17
WP4864.split1	Host-pathogen interaction of human coronaviruses - apoptosis	2	1	SLED2.1	Innate immune response, inflammation, IL1 and IL6 signaling	Fatty acid metabolis, IL17
WP5090.split3	Complement system in neuronal development and plasticity	2	1	SLED2.1	Innate immune response, inflammation, IL1 and IL6 signaling	Fatty acid metabolis, IL17
WP733	Serotonin receptor 2 and STAT3 signaling	2	1	SLED2.1	Innate immune response, inflammation, IL1 and IL6 signaling	Fatty acid metabolis, IL17
M14.76.split1	Leukocyte activation	2	1	SLED2.1	Innate immune response, inflammation, IL1 and IL6 signaling	Fatty acid metabolis, IL17
M15.43.split2	TBD	2	1	SLED2.1	Innate immune response, inflammation, IL1 and IL6 signaling	Fatty acid metabolis, IL17
M16.22.split1	TBD	2	1	SLED2.1	Innate immune response, inflammation, IL1 and IL6 signaling	Fatty acid metabolis, IL17
LI.M20.split2	AP-1 transcription factor network	2	2	SLED2.2	Innate immune response, inflammation, IL1 and IL6 signaling	AP-1 transcription factors
LI.M46.split3	cell division stimulated CD4+ T cells	2	2	SLED2.2	Innate immune response, inflammation, IL1 and IL6 signaling	AP-1 transcription factors
LI.M53.split1	inflammasome receptors and signaling	2	2	SLED2.2	Innate immune response, inflammation, IL1 and IL6 signaling	AP-1 transcription factors
LI.M118.1.split1	enriched in monocytes (surface)	2	2	SLED2.2	Innate immune response, inflammation, IL1 and IL6 signaling	AP-1 transcription factors
DC.M7.10.split1	Undetermined	2	2	SLED2.2	Innate immune response, inflammation, IL1 and IL6 signaling	AP-1 transcription factors
DC.M8.48.split2	Undetermined	2	2	SLED2.2	Innate immune response, inflammation, IL1 and IL6 signaling	AP-1 transcription factors
GO:0001843.split3	neural tube closure	2	2	SLED2.2	Innate immune response, inflammation, IL1 and IL6 signaling	AP-1 transcription factors
GO:0002862.split1	negative regulation of inflammatory response to antigenic stimulus	2	2	SLED2.2	Innate immune response, inflammation, IL1 and IL6 signaling	AP-1 transcription factors
GO:0002903.split1	negative regulation of B cell apoptotic process	2	2	SLED2.2	Innate immune response, inflammation, IL1 and IL6 signaling	AP-1 transcription factors
GO:0006611.split2	protein export from nucleus	2	2	SLED2.2	Innate immune response, inflammation, IL1 and IL6 signaling	AP-1 transcription factors
GO:0006959.split4	humoral immune response	2	2	SLED2.2	Innate immune response, inflammation, IL1 and IL6 signaling	AP-1 transcription factors
GO:0007229.split4	integrin-mediated signaling pathway	2	2	SLED2.2	Innate immune response, inflammation, IL1 and IL6 signaling	AP-1 transcription factors
GO:0007417.split7	central nervous system development	2	2	SLED2.2	Innate immune response, inflammation, IL1 and IL6 signaling	AP-1 transcription factors
GO:0009101.split1	glycoprotein biosynthetic process	2	2	SLED2.2	Innate immune response, inflammation, IL1 and IL6 signaling	AP-1 transcription factors
GO:0014002.split1	astrocyte development	2	2	SLED2.2	Innate immune response, inflammation, IL1 and IL6 signaling	AP-1 transcription factors
GO:0016043.split3	cellular component organization	2	2	SLED2.2	Innate immune response, inflammation, IL1 and IL6 signaling	AP-1 transcription factors
GO:0016485.split2	protein processing	2	2	SLED2.2	Innate immune response, inflammation, IL1 and IL6 signaling	AP-1 transcription factors
GO:0019082.split2	viral protein processing	2	2	SLED2.2	Innate immune response, inflammation, IL1 and IL6 signaling	AP-1 transcription factors
GO:0019915.split1	lipid storage	2	2	SLED2.2	Innate immune response, inflammation, IL1 and IL6 signaling	AP-1 transcription factors
GO:0030316.split2	osteoclast differentiation	2	2	SLED2.2	Innate immune response, inflammation, IL1 and IL6 signaling	AP-1 transcription factors
GO:0030324.split8	lung development	2	2	SLED2.2	Innate immune response, inflammation, IL1 and IL6 signaling	AP-1 transcription factors
GO:0031065.split2	positive regulation of histone deacetylation	2	2	SLED2.2	Innate immune response, inflammation, IL1 and IL6 signaling	AP-1 transcription factors
GO:0031116.split3	positive regulation of microtubule polymerization	2	2	SLED2.2	Innate immune response, inflammation, IL1 and IL6 signaling	AP-1 transcription factors
GO:0034614.split2	cellular response to reactive oxygen species	2	2	SLED2.2	Innate immune response, inflammation, IL1 and IL6 signaling	AP-1 transcription factors
GO:0046627.split1	negative regulation of insulin receptor signaling pathway	2	2	SLED2.2	Innate immune response, inflammation, IL1 and IL6 signaling	AP-1 transcription factors
GO:0072709	cellular response to sorbitol	2	2	SLED2.2	Innate immune response, inflammation, IL1 and IL6 signaling	AP-1 transcription factors
GO:1990830.split3	cellular response to leukemia inhibitory factor	2	2	SLED2.2	Innate immune response, inflammation, IL1 and IL6 signaling	AP-1 transcription factors
GO:0009925.split3	basal plasma membrane	2	2	SLED2.2	Innate immune response, inflammation, IL1 and IL6 signaling	AP-1 transcription factors
GO:0033116.split1	endoplasmic reticulum-Golgi intermediate compartment membrane	2	2	SLED2.2	Innate immune response, inflammation, IL1 and IL6 signaling	AP-1 transcription factors
GO:0036488	CHOP-C/EBP complex	2	2	SLED2.2	Innate immune response, inflammation, IL1 and IL6 signaling	AP-1 transcription factors
GO:0004860.split1	protein kinase inhibitor activity	2	2	SLED2.2	Innate immune response, inflammation, IL1 and IL6 signaling	AP-1 transcription factors
GO:0035091.split4	phosphatidylinositol binding	2	2	SLED2.2	Innate immune response, inflammation, IL1 and IL6 signaling	AP-1 transcription factors
GO:0039552	RIG-I binding	2	2	SLED2.2	Innate immune response, inflammation, IL1 and IL6 signaling	AP-1 transcription factors
R-HSA-1296071.split4	Potassium Channels	2	2	SLED2.2	Innate immune response, inflammation, IL1 and IL6 signaling	AP-1 transcription factors
R-HSA-15869.split2	Metabolism of nucleotides	2	2	SLED2.2	Innate immune response, inflammation, IL1 and IL6 signaling	AP-1 transcription factors
R-HSA-2046104.split2	alpha-linolenic (omega3) and linoleic (omega6) acid metabolism	2	2	SLED2.2	Innate immune response, inflammation, IL1 and IL6 signaling	AP-1 transcription factors
R-HSA-373752.split5	Netrin-1 signaling	2	2	SLED2.2	Innate immune response, inflammation, IL1 and IL6 signaling	AP-1 transcription factors
R-HSA-400685.split2	Sema4D in semaphorin signaling	2	2	SLED2.2	Innate immune response, inflammation, IL1 and IL6 signaling	AP-1 transcription factors
R-HSA-450341.split1	Activation of the AP-1 family of transcription factors	2	2	SLED2.2	Innate immune response, inflammation, IL1 and IL6 signaling	AP-1 transcription factors
R-HSA-5676934	Protein repair	2	2	SLED2.2	Innate immune response, inflammation, IL1 and IL6 signaling	AP-1 transcription factors
R-HSA-8943724.split5	Regulation of PTEN gene transcription	2	2	SLED2.2	Innate immune response, inflammation, IL1 and IL6 signaling	AP-1 transcription factors
R-HSA-9648895.split2	Response of EIF2AK1 (HRI) to heme deficiency	2	2	SLED2.2	Innate immune response, inflammation, IL1 and IL6 signaling	AP-1 transcription factors
R-HSA-9725371.split1	Nuclear events stimulated by ALK signaling in cancer	2	2	SLED2.2	Innate immune response, inflammation, IL1 and IL6 signaling	AP-1 transcription factors
R-HSA-975576.split1	N-glycan antennae elongation in the medial/trans-Golgi	2	2	SLED2.2	Innate immune response, inflammation, IL1 and IL6 signaling	AP-1 transcription factors
hsa00052.split1	Galactose metabolism	2	2	SLED2.2	Innate immune response, inflammation, IL1 and IL6 signaling	AP-1 transcription factors
hsa05216.split5	Thyroid cancer	2	2	SLED2.2	Innate immune response, inflammation, IL1 and IL6 signaling	AP-1 transcription factors
WP2431.split5	Spinal cord injury	2	2	SLED2.2	Innate immune response, inflammation, IL1 and IL6 signaling	AP-1 transcription factors
WP2572.split7	Primary focal segmental glomerulosclerosis (FSGS)	2	2	SLED2.2	Innate immune response, inflammation, IL1 and IL6 signaling	AP-1 transcription factors
WP3612.split3	Photodynamic therapy-induced NFE2L2 (NRF2) survival signaling	2	2	SLED2.2	Innate immune response, inflammation, IL1 and IL6 signaling	AP-1 transcription factors
WP4149.split2	White fat cell differentiation	2	2	SLED2.2	Innate immune response, inflammation, IL1 and IL6 signaling	AP-1 transcription factors
WP4241.split4	Type 2 papillary renal cell carcinoma	2	2	SLED2.2	Innate immune response, inflammation, IL1 and IL6 signaling	AP-1 transcription factors
WP4482.split3	Vitamin D in inflammatory diseases	2	2	SLED2.2	Innate immune response, inflammation, IL1 and IL6 signaling	AP-1 transcription factors
WP5033.split3	Genes associated with the development of rheumatoid arthritis	2	2	SLED2.2	Innate immune response, inflammation, IL1 and IL6 signaling	AP-1 transcription factors
WP712.split3	Estrogen signaling pathway	2	2	SLED2.2	Innate immune response, inflammation, IL1 and IL6 signaling	AP-1 transcription factors
Macrophages_M1.split7	Macrophages_M1	2	2	SLED2.2	Innate immune response, inflammation, IL1 and IL6 signaling	AP-1 transcription factors
LI.M25.split1	TLR8-BAFF network	2	3	SLED2.3	Innate immune response, inflammation, IL1 and IL6 signaling	Inflammation, IL1, TLR8-BAFF network, fructose 2,6-bisphosphate metabolism
DC.M4.2.split3	Inflammation	2	3	SLED2.3	Innate immune response, inflammation, IL1 and IL6 signaling	Inflammation, IL1, TLR8-BAFF network, fructose 2,6-bisphosphate metabolism
DC.M7.29.split4	Undetermined	2	3	SLED2.3	Innate immune response, inflammation, IL1 and IL6 signaling	Inflammation, IL1, TLR8-BAFF network, fructose 2,6-bisphosphate metabolism
DC.M7.35.split2	Undetermined	2	3	SLED2.3	Innate immune response, inflammation, IL1 and IL6 signaling	Inflammation, IL1, TLR8-BAFF network, fructose 2,6-bisphosphate metabolism
GO:0006003	fructose 2,6-bisphosphate metabolic process	2	3	SLED2.3	Innate immune response, inflammation, IL1 and IL6 signaling	Inflammation, IL1, TLR8-BAFF network, fructose 2,6-bisphosphate metabolism
GO:0009617.split1	response to bacterium	2	3	SLED2.3	Innate immune response, inflammation, IL1 and IL6 signaling	Inflammation, IL1, TLR8-BAFF network, fructose 2,6-bisphosphate metabolism
GO:0009749.split2	response to glucose	2	3	SLED2.3	Innate immune response, inflammation, IL1 and IL6 signaling	Inflammation, IL1, TLR8-BAFF network, fructose 2,6-bisphosphate metabolism
GO:0015701.split4	bicarbonate transport	2	3	SLED2.3	Innate immune response, inflammation, IL1 and IL6 signaling	Inflammation, IL1, TLR8-BAFF network, fructose 2,6-bisphosphate metabolism
GO:0042130.split2	negative regulation of T cell proliferation	2	3	SLED2.3	Innate immune response, inflammation, IL1 and IL6 signaling	Inflammation, IL1, TLR8-BAFF network, fructose 2,6-bisphosphate metabolism
GO:0060828.split1	regulation of canonical Wnt signaling pathway	2	3	SLED2.3	Innate immune response, inflammation, IL1 and IL6 signaling	Inflammation, IL1, TLR8-BAFF network, fructose 2,6-bisphosphate metabolism
GO:0070555.split1	response to interleukin-1	2	3	SLED2.3	Innate immune response, inflammation, IL1 and IL6 signaling	Inflammation, IL1, TLR8-BAFF network, fructose 2,6-bisphosphate metabolism
GO:0003873	6-phosphofructo-2-kinase activity	2	3	SLED2.3	Innate immune response, inflammation, IL1 and IL6 signaling	Inflammation, IL1, TLR8-BAFF network, fructose 2,6-bisphosphate metabolism
GO:0004908	interleukin-1 receptor activity	2	3	SLED2.3	Innate immune response, inflammation, IL1 and IL6 signaling	Inflammation, IL1, TLR8-BAFF network, fructose 2,6-bisphosphate metabolism
R-HSA-9634600.split2	Regulation of glycolysis by fructose 2,6-bisphosphate metabolism	2	3	SLED2.3	Innate immune response, inflammation, IL1 and IL6 signaling	Inflammation, IL1, TLR8-BAFF network, fructose 2,6-bisphosphate metabolism
hsa04060.split11	Cytokine-cytokine receptor interaction	2	3	SLED2.3	Innate immune response, inflammation, IL1 and IL6 signaling	Inflammation, IL1, TLR8-BAFF network, fructose 2,6-bisphosphate metabolism
hsa05146.split5	Amoebiasis	2	3	SLED2.3	Innate immune response, inflammation, IL1 and IL6 signaling	Inflammation, IL1, TLR8-BAFF network, fructose 2,6-bisphosphate metabolism
hsa05215.split7	Prostate cancer	2	3	SLED2.3	Innate immune response, inflammation, IL1 and IL6 signaling	Inflammation, IL1, TLR8-BAFF network, fructose 2,6-bisphosphate metabolism
WP3599.split1	Transcription factor regulation in adipogenesis	2	3	SLED2.3	Innate immune response, inflammation, IL1 and IL6 signaling	Inflammation, IL1, TLR8-BAFF network, fructose 2,6-bisphosphate metabolism
WP5044.split2	Kynurenine pathway and links to cell senescence	2	3	SLED2.3	Innate immune response, inflammation, IL1 and IL6 signaling	Inflammation, IL1, TLR8-BAFF network, fructose 2,6-bisphosphate metabolism
M15.113.split2	Inflammation	2	3	SLED2.3	Innate immune response, inflammation, IL1 and IL6 signaling	Inflammation, IL1, TLR8-BAFF network, fructose 2,6-bisphosphate metabolism
M16.37.split4	TBD	2	3	SLED2.3	Innate immune response, inflammation, IL1 and IL6 signaling	Inflammation, IL1, TLR8-BAFF network, fructose 2,6-bisphosphate metabolism
M16.67.split1	TBD	2	3	SLED2.3	Innate immune response, inflammation, IL1 and IL6 signaling	Inflammation, IL1, TLR8-BAFF network, fructose 2,6-bisphosphate metabolism
M16.70.split3	TBD	2	3	SLED2.3	Innate immune response, inflammation, IL1 and IL6 signaling	Inflammation, IL1, TLR8-BAFF network, fructose 2,6-bisphosphate metabolism
M16.76.split2	TBD	2	3	SLED2.3	Innate immune response, inflammation, IL1 and IL6 signaling	Inflammation, IL1, TLR8-BAFF network, fructose 2,6-bisphosphate metabolism
LI.M71.split2	enriched in antigen presentation (I)	2	4	SLED2.4	Innate immune response, inflammation, IL1 and IL6 signaling	Inflammation, IL1, IL4, IL6, MAPK and NF-kB signaling
LI.M86.0.split3	chemokines and inflammatory molecules in myeloid cells	2	4	SLED2.4	Innate immune response, inflammation, IL1 and IL6 signaling	Inflammation, IL1, IL4, IL6, MAPK and NF-kB signaling
DC.M4.2.split1	Inflammation	2	4	SLED2.4	Innate immune response, inflammation, IL1 and IL6 signaling	Inflammation, IL1, IL4, IL6, MAPK and NF-kB signaling
DC.M7.16.split1	Undetermined	2	4	SLED2.4	Innate immune response, inflammation, IL1 and IL6 signaling	Inflammation, IL1, IL4, IL6, MAPK and NF-kB signaling
DC.M9.29.split3	Undetermined	2	4	SLED2.4	Innate immune response, inflammation, IL1 and IL6 signaling	Inflammation, IL1, IL4, IL6, MAPK and NF-kB signaling
GO:0001774.split3	microglial cell activation	2	4	SLED2.4	Innate immune response, inflammation, IL1 and IL6 signaling	Inflammation, IL1, IL4, IL6, MAPK and NF-kB signaling
GO:0002292	T cell differentiation involved in immune response	2	4	SLED2.4	Innate immune response, inflammation, IL1 and IL6 signaling	Inflammation, IL1, IL4, IL6, MAPK and NF-kB signaling
GO:0006366.split6	transcription by RNA polymerase II	2	4	SLED2.4	Innate immune response, inflammation, IL1 and IL6 signaling	Inflammation, IL1, IL4, IL6, MAPK and NF-kB signaling
GO:0006641.split1	triglyceride metabolic process	2	4	SLED2.4	Innate immune response, inflammation, IL1 and IL6 signaling	Inflammation, IL1, IL4, IL6, MAPK and NF-kB signaling
GO:0006954.split6	inflammatory response	2	4	SLED2.4	Innate immune response, inflammation, IL1 and IL6 signaling	Inflammation, IL1, IL4, IL6, MAPK and NF-kB signaling
GO:0006955.split7	immune response	2	4	SLED2.4	Innate immune response, inflammation, IL1 and IL6 signaling	Inflammation, IL1, IL4, IL6, MAPK and NF-kB signaling
GO:0007605.split4	sensory perception of sound	2	4	SLED2.4	Innate immune response, inflammation, IL1 and IL6 signaling	Inflammation, IL1, IL4, IL6, MAPK and NF-kB signaling
GO:0008610.split2	lipid biosynthetic process	2	4	SLED2.4	Innate immune response, inflammation, IL1 and IL6 signaling	Inflammation, IL1, IL4, IL6, MAPK and NF-kB signaling
GO:0010466.split2	negative regulation of peptidase activity	2	4	SLED2.4	Innate immune response, inflammation, IL1 and IL6 signaling	Inflammation, IL1, IL4, IL6, MAPK and NF-kB signaling
GO:0016311.split6	dephosphorylation	2	4	SLED2.4	Innate immune response, inflammation, IL1 and IL6 signaling	Inflammation, IL1, IL4, IL6, MAPK and NF-kB signaling
GO:0031334.split7	positive regulation of protein-containing complex assembly	2	4	SLED2.4	Innate immune response, inflammation, IL1 and IL6 signaling	Inflammation, IL1, IL4, IL6, MAPK and NF-kB signaling
GO:0031647.split4	regulation of protein stability	2	4	SLED2.4	Innate immune response, inflammation, IL1 and IL6 signaling	Inflammation, IL1, IL4, IL6, MAPK and NF-kB signaling
GO:0031663.split2	lipopolysaccharide-mediated signaling pathway	2	4	SLED2.4	Innate immune response, inflammation, IL1 and IL6 signaling	Inflammation, IL1, IL4, IL6, MAPK and NF-kB signaling
GO:0031665.split1	negative regulation of lipopolysaccharide-mediated signaling pathway	2	4	SLED2.4	Innate immune response, inflammation, IL1 and IL6 signaling	Inflammation, IL1, IL4, IL6, MAPK and NF-kB signaling
GO:0032731.split1	positive regulation of interleukin-1 beta production	2	4	SLED2.4	Innate immune response, inflammation, IL1 and IL6 signaling	Inflammation, IL1, IL4, IL6, MAPK and NF-kB signaling
GO:0032755.split5	positive regulation of interleukin-6 production	2	4	SLED2.4	Innate immune response, inflammation, IL1 and IL6 signaling	Inflammation, IL1, IL4, IL6, MAPK and NF-kB signaling
GO:0033138.split5	positive regulation of peptidyl-serine phosphorylation	2	4	SLED2.4	Innate immune response, inflammation, IL1 and IL6 signaling	Inflammation, IL1, IL4, IL6, MAPK and NF-kB signaling
GO:0035994.split2	response to muscle stretch	2	4	SLED2.4	Innate immune response, inflammation, IL1 and IL6 signaling	Inflammation, IL1, IL4, IL6, MAPK and NF-kB signaling
GO:0042742.split3	defense response to bacterium	2	4	SLED2.4	Innate immune response, inflammation, IL1 and IL6 signaling	Inflammation, IL1, IL4, IL6, MAPK and NF-kB signaling
GO:0043200.split4	response to amino acid	2	4	SLED2.4	Innate immune response, inflammation, IL1 and IL6 signaling	Inflammation, IL1, IL4, IL6, MAPK and NF-kB signaling
GO:0043407.split4	negative regulation of MAP kinase activity	2	4	SLED2.4	Innate immune response, inflammation, IL1 and IL6 signaling	Inflammation, IL1, IL4, IL6, MAPK and NF-kB signaling
GO:0050918.split2	positive chemotaxis	2	4	SLED2.4	Innate immune response, inflammation, IL1 and IL6 signaling	Inflammation, IL1, IL4, IL6, MAPK and NF-kB signaling
GO:0070059.split3	intrinsic apoptotic signaling pathway in response to endoplasmic reticulum stress	2	4	SLED2.4	Innate immune response, inflammation, IL1 and IL6 signaling	Inflammation, IL1, IL4, IL6, MAPK and NF-kB signaling
GO:1904466	positive regulation of matrix metallopeptidase secretion	2	4	SLED2.4	Innate immune response, inflammation, IL1 and IL6 signaling	Inflammation, IL1, IL4, IL6, MAPK and NF-kB signaling
GO:1904646.split5	cellular response to amyloid-beta	2	4	SLED2.4	Innate immune response, inflammation, IL1 and IL6 signaling	Inflammation, IL1, IL4, IL6, MAPK and NF-kB signaling
GO:1990869.split3	cellular response to chemokine	2	4	SLED2.4	Innate immune response, inflammation, IL1 and IL6 signaling	Inflammation, IL1, IL4, IL6, MAPK and NF-kB signaling
GO:0001891.split1	phagocytic cup	2	4	SLED2.4	Innate immune response, inflammation, IL1 and IL6 signaling	Inflammation, IL1, IL4, IL6, MAPK and NF-kB signaling
GO:0005741.split8	mitochondrial outer membrane	2	4	SLED2.4	Innate immune response, inflammation, IL1 and IL6 signaling	Inflammation, IL1, IL4, IL6, MAPK and NF-kB signaling
GO:0030667.split3	secretory granule membrane	2	4	SLED2.4	Innate immune response, inflammation, IL1 and IL6 signaling	Inflammation, IL1, IL4, IL6, MAPK and NF-kB signaling
GO:0031226.split4	intrinsic component of plasma membrane	2	4	SLED2.4	Innate immune response, inflammation, IL1 and IL6 signaling	Inflammation, IL1, IL4, IL6, MAPK and NF-kB signaling
GO:0101003.split5	ficolin-1-rich granule membrane	2	4	SLED2.4	Innate immune response, inflammation, IL1 and IL6 signaling	Inflammation, IL1, IL4, IL6, MAPK and NF-kB signaling
GO:0001540.split6	amyloid-beta binding	2	4	SLED2.4	Innate immune response, inflammation, IL1 and IL6 signaling	Inflammation, IL1, IL4, IL6, MAPK and NF-kB signaling
GO:0001875	lipopolysaccharide immune receptor activity	2	4	SLED2.4	Innate immune response, inflammation, IL1 and IL6 signaling	Inflammation, IL1, IL4, IL6, MAPK and NF-kB signaling
GO:0016757.split6	glycosyltransferase activity	2	4	SLED2.4	Innate immune response, inflammation, IL1 and IL6 signaling	Inflammation, IL1, IL4, IL6, MAPK and NF-kB signaling
GO:0019903.split6	protein phosphatase binding	2	4	SLED2.4	Innate immune response, inflammation, IL1 and IL6 signaling	Inflammation, IL1, IL4, IL6, MAPK and NF-kB signaling
GO:0046983.split1	protein dimerization activity	2	4	SLED2.4	Innate immune response, inflammation, IL1 and IL6 signaling	Inflammation, IL1, IL4, IL6, MAPK and NF-kB signaling
GO:0061809.split2	NAD+ nucleotidase, cyclic ADP-ribose generating	2	4	SLED2.4	Innate immune response, inflammation, IL1 and IL6 signaling	Inflammation, IL1, IL4, IL6, MAPK and NF-kB signaling
GO:0071723.split2	lipopeptide binding	2	4	SLED2.4	Innate immune response, inflammation, IL1 and IL6 signaling	Inflammation, IL1, IL4, IL6, MAPK and NF-kB signaling
GO:1990837.split5	sequence-specific double-stranded DNA binding	2	4	SLED2.4	Innate immune response, inflammation, IL1 and IL6 signaling	Inflammation, IL1, IL4, IL6, MAPK and NF-kB signaling
R-HSA-168256.split6	Immune System	2	4	SLED2.4	Innate immune response, inflammation, IL1 and IL6 signaling	Inflammation, IL1, IL4, IL6, MAPK and NF-kB signaling
R-HSA-202733.split7	Cell surface interactions at the vascular wall	2	4	SLED2.4	Innate immune response, inflammation, IL1 and IL6 signaling	Inflammation, IL1, IL4, IL6, MAPK and NF-kB signaling
R-HSA-446652.split3	Interleukin-1 family signaling	2	4	SLED2.4	Innate immune response, inflammation, IL1 and IL6 signaling	Inflammation, IL1, IL4, IL6, MAPK and NF-kB signaling
R-HSA-9031628.split3	NGF-stimulated transcription	2	4	SLED2.4	Innate immune response, inflammation, IL1 and IL6 signaling	Inflammation, IL1, IL4, IL6, MAPK and NF-kB signaling
hsa04010.split6	MAPK signaling pathway	2	4	SLED2.4	Innate immune response, inflammation, IL1 and IL6 signaling	Inflammation, IL1, IL4, IL6, MAPK and NF-kB signaling
hsa04064.split2	NF-kappa B signaling pathway	2	4	SLED2.4	Innate immune response, inflammation, IL1 and IL6 signaling	Inflammation, IL1, IL4, IL6, MAPK and NF-kB signaling
hsa04218.split7	Cellular senescence	2	4	SLED2.4	Innate immune response, inflammation, IL1 and IL6 signaling	Inflammation, IL1, IL4, IL6, MAPK and NF-kB signaling
hsa04625.split4	C-type lectin receptor signaling pathway	2	4	SLED2.4	Innate immune response, inflammation, IL1 and IL6 signaling	Inflammation, IL1, IL4, IL6, MAPK and NF-kB signaling
hsa04920.split4	Adipocytokine signaling pathway	2	4	SLED2.4	Innate immune response, inflammation, IL1 and IL6 signaling	Inflammation, IL1, IL4, IL6, MAPK and NF-kB signaling
hsa04931.split6	Insulin resistance	2	4	SLED2.4	Innate immune response, inflammation, IL1 and IL6 signaling	Inflammation, IL1, IL4, IL6, MAPK and NF-kB signaling
hsa05142.split4	Chagas disease	2	4	SLED2.4	Innate immune response, inflammation, IL1 and IL6 signaling	Inflammation, IL1, IL4, IL6, MAPK and NF-kB signaling
hsa05222.split5	Small cell lung cancer	2	4	SLED2.4	Innate immune response, inflammation, IL1 and IL6 signaling	Inflammation, IL1, IL4, IL6, MAPK and NF-kB signaling
hsa05230.split6	Central carbon metabolism in cancer	2	4	SLED2.4	Innate immune response, inflammation, IL1 and IL6 signaling	Inflammation, IL1, IL4, IL6, MAPK and NF-kB signaling
WP2355.split3	Corticotropin-releasing hormone signaling pathway	2	4	SLED2.4	Innate immune response, inflammation, IL1 and IL6 signaling	Inflammation, IL1, IL4, IL6, MAPK and NF-kB signaling
WP2374.split4	Oncostatin M signaling pathway	2	4	SLED2.4	Innate immune response, inflammation, IL1 and IL6 signaling	Inflammation, IL1, IL4, IL6, MAPK and NF-kB signaling
WP2806.split1	Complement system	2	4	SLED2.4	Innate immune response, inflammation, IL1 and IL6 signaling	Inflammation, IL1, IL4, IL6, MAPK and NF-kB signaling
WP2865.split1	IL1 and megakaryocytes in obesity	2	4	SLED2.4	Innate immune response, inflammation, IL1 and IL6 signaling	Inflammation, IL1, IL4, IL6, MAPK and NF-kB signaling
WP2880.split6	Glucocorticoid receptor pathway	2	4	SLED2.4	Innate immune response, inflammation, IL1 and IL6 signaling	Inflammation, IL1, IL4, IL6, MAPK and NF-kB signaling
WP2882.split4	Nuclear receptors meta-pathway	2	4	SLED2.4	Innate immune response, inflammation, IL1 and IL6 signaling	Inflammation, IL1, IL4, IL6, MAPK and NF-kB signaling
WP3584.split2	MECP2 and associated Rett syndrome	2	4	SLED2.4	Innate immune response, inflammation, IL1 and IL6 signaling	Inflammation, IL1, IL4, IL6, MAPK and NF-kB signaling
WP395.split4	IL-4 signaling pathway	2	4	SLED2.4	Innate immune response, inflammation, IL1 and IL6 signaling	Inflammation, IL1, IL4, IL6, MAPK and NF-kB signaling
WP400.split1	p38 MAPK signaling pathway	2	4	SLED2.4	Innate immune response, inflammation, IL1 and IL6 signaling	Inflammation, IL1, IL4, IL6, MAPK and NF-kB signaling
WP4329.split3	miRNAs involvement in the immune response in sepsis	2	4	SLED2.4	Innate immune response, inflammation, IL1 and IL6 signaling	Inflammation, IL1, IL4, IL6, MAPK and NF-kB signaling
WP4478.split1	LTF danger signal response pathway	2	4	SLED2.4	Innate immune response, inflammation, IL1 and IL6 signaling	Inflammation, IL1, IL4, IL6, MAPK and NF-kB signaling
WP4494.split1	Selective expression of chemokine receptors during T-cell polarization	2	4	SLED2.4	Innate immune response, inflammation, IL1 and IL6 signaling	Inflammation, IL1, IL4, IL6, MAPK and NF-kB signaling
WP4559.split5	Interactions between immune cells and microRNAs in tumor microenvironment	2	4	SLED2.4	Innate immune response, inflammation, IL1 and IL6 signaling	Inflammation, IL1, IL4, IL6, MAPK and NF-kB signaling
WP4721.split2	Eicosanoid metabolism via lipooxygenases (LOX)	2	4	SLED2.4	Innate immune response, inflammation, IL1 and IL6 signaling	Inflammation, IL1, IL4, IL6, MAPK and NF-kB signaling
WP4919.split2	Neuroinflammation	2	4	SLED2.4	Innate immune response, inflammation, IL1 and IL6 signaling	Inflammation, IL1, IL4, IL6, MAPK and NF-kB signaling
WP5055.split2	Burn wound healing	2	4	SLED2.4	Innate immune response, inflammation, IL1 and IL6 signaling	Inflammation, IL1, IL4, IL6, MAPK and NF-kB signaling
M16.44.split4	Protein synthesis	2	4	SLED2.4	Innate immune response, inflammation, IL1 and IL6 signaling	Inflammation, IL1, IL4, IL6, MAPK and NF-kB signaling
M16.79.split2	Protein synthesis	2	4	SLED2.4	Innate immune response, inflammation, IL1 and IL6 signaling	Inflammation, IL1, IL4, IL6, MAPK and NF-kB signaling
M16.86.split1	Oxidative stress	2	4	SLED2.4	Innate immune response, inflammation, IL1 and IL6 signaling	Inflammation, IL1, IL4, IL6, MAPK and NF-kB signaling
CMP.split3	CMP	2	4	SLED2.4	Innate immune response, inflammation, IL1 and IL6 signaling	Inflammation, IL1, IL4, IL6, MAPK and NF-kB signaling
Neutrophils.split3	Neutrophils	2	4	SLED2.4	Innate immune response, inflammation, IL1 and IL6 signaling	Inflammation, IL1, IL4, IL6, MAPK and NF-kB signaling
LI.M81.split1	enriched in myeloid cells and monocytes	2	5	SLED2.5	Innate immune response, inflammation, IL1 and IL6 signaling	Inflammation, neutrophils, monotypes, resting DCs, IL1, IL4, IL13, NF-kB signaling
LI.S10.split5	Resting dendritic cell surface signature	2	5	SLED2.5	Innate immune response, inflammation, IL1 and IL6 signaling	Inflammation, neutrophils, monotypes, resting DCs, IL1, IL4, IL13, NF-kB signaling
DC.M3.2	Inflammation	2	5	SLED2.5	Innate immune response, inflammation, IL1 and IL6 signaling	Inflammation, neutrophils, monotypes, resting DCs, IL1, IL4, IL13, NF-kB signaling
DC.M4.2.split2	Inflammation	2	5	SLED2.5	Innate immune response, inflammation, IL1 and IL6 signaling	Inflammation, neutrophils, monotypes, resting DCs, IL1, IL4, IL13, NF-kB signaling
DC.M7.29.split1	Undetermined	2	5	SLED2.5	Innate immune response, inflammation, IL1 and IL6 signaling	Inflammation, neutrophils, monotypes, resting DCs, IL1, IL4, IL13, NF-kB signaling
DC.M7.29.split5	Undetermined	2	5	SLED2.5	Innate immune response, inflammation, IL1 and IL6 signaling	Inflammation, neutrophils, monotypes, resting DCs, IL1, IL4, IL13, NF-kB signaling
GO:0000038.split1	very long-chain fatty acid metabolic process	2	5	SLED2.5	Innate immune response, inflammation, IL1 and IL6 signaling	Inflammation, neutrophils, monotypes, resting DCs, IL1, IL4, IL13, NF-kB signaling
GO:0001817.split1	regulation of cytokine production	2	5	SLED2.5	Innate immune response, inflammation, IL1 and IL6 signaling	Inflammation, neutrophils, monotypes, resting DCs, IL1, IL4, IL13, NF-kB signaling
GO:0001934.split3	positive regulation of protein phosphorylation	2	5	SLED2.5	Innate immune response, inflammation, IL1 and IL6 signaling	Inflammation, neutrophils, monotypes, resting DCs, IL1, IL4, IL13, NF-kB signaling
GO:0006486.split1	protein glycosylation	2	5	SLED2.5	Innate immune response, inflammation, IL1 and IL6 signaling	Inflammation, neutrophils, monotypes, resting DCs, IL1, IL4, IL13, NF-kB signaling
GO:0007519.split2	skeletal muscle tissue development	2	5	SLED2.5	Innate immune response, inflammation, IL1 and IL6 signaling	Inflammation, neutrophils, monotypes, resting DCs, IL1, IL4, IL13, NF-kB signaling
GO:0043315	positive regulation of neutrophil degranulation	2	5	SLED2.5	Innate immune response, inflammation, IL1 and IL6 signaling	Inflammation, neutrophils, monotypes, resting DCs, IL1, IL4, IL13, NF-kB signaling
GO:0045595.split5	regulation of cell differentiation	2	5	SLED2.5	Innate immune response, inflammation, IL1 and IL6 signaling	Inflammation, neutrophils, monotypes, resting DCs, IL1, IL4, IL13, NF-kB signaling
GO:0051092.split2	positive regulation of NF-kappaB transcription factor activity	2	5	SLED2.5	Innate immune response, inflammation, IL1 and IL6 signaling	Inflammation, neutrophils, monotypes, resting DCs, IL1, IL4, IL13, NF-kB signaling
GO:0070498.split1	interleukin-1-mediated signaling pathway	2	5	SLED2.5	Innate immune response, inflammation, IL1 and IL6 signaling	Inflammation, neutrophils, monotypes, resting DCs, IL1, IL4, IL13, NF-kB signaling
GO:0030659.split8	cytoplasmic vesicle membrane	2	5	SLED2.5	Innate immune response, inflammation, IL1 and IL6 signaling	Inflammation, neutrophils, monotypes, resting DCs, IL1, IL4, IL13, NF-kB signaling
GO:0005544.split3	calcium-dependent phospholipid binding	2	5	SLED2.5	Innate immune response, inflammation, IL1 and IL6 signaling	Inflammation, neutrophils, monotypes, resting DCs, IL1, IL4, IL13, NF-kB signaling
R-HSA-171007.split2	p38MAPK events	2	5	SLED2.5	Innate immune response, inflammation, IL1 and IL6 signaling	Inflammation, neutrophils, monotypes, resting DCs, IL1, IL4, IL13, NF-kB signaling
R-HSA-2559583.split7	Cellular Senescence	2	5	SLED2.5	Innate immune response, inflammation, IL1 and IL6 signaling	Inflammation, neutrophils, monotypes, resting DCs, IL1, IL4, IL13, NF-kB signaling
R-HSA-449147.split7	Signaling by Interleukins	2	5	SLED2.5	Innate immune response, inflammation, IL1 and IL6 signaling	Inflammation, neutrophils, monotypes, resting DCs, IL1, IL4, IL13, NF-kB signaling
R-HSA-6785807.split2	Interleukin-4 and Interleukin-13 signaling	2	5	SLED2.5	Innate immune response, inflammation, IL1 and IL6 signaling	Inflammation, neutrophils, monotypes, resting DCs, IL1, IL4, IL13, NF-kB signaling
hsa04610.split1	Complement and coagulation cascades	2	5	SLED2.5	Innate immune response, inflammation, IL1 and IL6 signaling	Inflammation, neutrophils, monotypes, resting DCs, IL1, IL4, IL13, NF-kB signaling
hsa04613.split1	Neutrophil extracellular trap formation	2	5	SLED2.5	Innate immune response, inflammation, IL1 and IL6 signaling	Inflammation, neutrophils, monotypes, resting DCs, IL1, IL4, IL13, NF-kB signaling
hsa04640.split6	Hematopoietic cell lineage	2	5	SLED2.5	Innate immune response, inflammation, IL1 and IL6 signaling	Inflammation, neutrophils, monotypes, resting DCs, IL1, IL4, IL13, NF-kB signaling
hsa05140.split4	Leishmaniasis	2	5	SLED2.5	Innate immune response, inflammation, IL1 and IL6 signaling	Inflammation, neutrophils, monotypes, resting DCs, IL1, IL4, IL13, NF-kB signaling
hsa05417.split1	Lipid and atherosclerosis	2	5	SLED2.5	Innate immune response, inflammation, IL1 and IL6 signaling	Inflammation, neutrophils, monotypes, resting DCs, IL1, IL4, IL13, NF-kB signaling
hsa05418.split5	Fluid shear stress and atherosclerosis	2	5	SLED2.5	Innate immune response, inflammation, IL1 and IL6 signaling	Inflammation, neutrophils, monotypes, resting DCs, IL1, IL4, IL13, NF-kB signaling
WP2815.split1	Mammary gland development pathway - Involution (Stage 4 of 4)	2	5	SLED2.5	Innate immune response, inflammation, IL1 and IL6 signaling	Inflammation, neutrophils, monotypes, resting DCs, IL1, IL4, IL13, NF-kB signaling
WP3624.split4	Lung fibrosis	2	5	SLED2.5	Innate immune response, inflammation, IL1 and IL6 signaling	Inflammation, neutrophils, monotypes, resting DCs, IL1, IL4, IL13, NF-kB signaling
WP4141.split3	PI3K/AKT/mTOR - VitD3 signaling	2	5	SLED2.5	Innate immune response, inflammation, IL1 and IL6 signaling	Inflammation, neutrophils, monotypes, resting DCs, IL1, IL4, IL13, NF-kB signaling
WP481.split3	Insulin signaling	2	5	SLED2.5	Innate immune response, inflammation, IL1 and IL6 signaling	Inflammation, neutrophils, monotypes, resting DCs, IL1, IL4, IL13, NF-kB signaling
WP500.split2	Glycogen synthesis and degradation	2	5	SLED2.5	Innate immune response, inflammation, IL1 and IL6 signaling	Inflammation, neutrophils, monotypes, resting DCs, IL1, IL4, IL13, NF-kB signaling
WP5083.split2	Neuroinflammation and glutamatergic signaling	2	5	SLED2.5	Innate immune response, inflammation, IL1 and IL6 signaling	Inflammation, neutrophils, monotypes, resting DCs, IL1, IL4, IL13, NF-kB signaling
WP558.split6	Complement and coagulation cascades	2	5	SLED2.5	Innate immune response, inflammation, IL1 and IL6 signaling	Inflammation, neutrophils, monotypes, resting DCs, IL1, IL4, IL13, NF-kB signaling
WP727.split3	Monoamine transport	2	5	SLED2.5	Innate immune response, inflammation, IL1 and IL6 signaling	Inflammation, neutrophils, monotypes, resting DCs, IL1, IL4, IL13, NF-kB signaling
M13.12.split1	Inflammation	2	5	SLED2.5	Innate immune response, inflammation, IL1 and IL6 signaling	Inflammation, neutrophils, monotypes, resting DCs, IL1, IL4, IL13, NF-kB signaling
M15.84.split1	Cytokines/chemokines	2	5	SLED2.5	Innate immune response, inflammation, IL1 and IL6 signaling	Inflammation, neutrophils, monotypes, resting DCs, IL1, IL4, IL13, NF-kB signaling
LI.M105.split3	TBA	2	6	SLED2.6	Innate immune response, inflammation, IL1 and IL6 signaling	Inflammation, cytokine and chemokine activity, GPCR signaling, synaptic transmission
LI.M132.split1	recruitment of neutrophils	2	6	SLED2.6	Innate immune response, inflammation, IL1 and IL6 signaling	Inflammation, cytokine and chemokine activity, GPCR signaling, synaptic transmission
LI.S5.split1	DC surface signature	2	6	SLED2.6	Innate immune response, inflammation, IL1 and IL6 signaling	Inflammation, cytokine and chemokine activity, GPCR signaling, synaptic transmission
GO:0002430.split1	complement receptor mediated signaling pathway	2	6	SLED2.6	Innate immune response, inflammation, IL1 and IL6 signaling	Inflammation, cytokine and chemokine activity, GPCR signaling, synaptic transmission
GO:0006811.split7	ion transport	2	6	SLED2.6	Innate immune response, inflammation, IL1 and IL6 signaling	Inflammation, cytokine and chemokine activity, GPCR signaling, synaptic transmission
GO:0007186.split16	G protein-coupled receptor signaling pathway	2	6	SLED2.6	Innate immune response, inflammation, IL1 and IL6 signaling	Inflammation, cytokine and chemokine activity, GPCR signaling, synaptic transmission
GO:0007204.split1	positive regulation of cytosolic calcium ion concentration	2	6	SLED2.6	Innate immune response, inflammation, IL1 and IL6 signaling	Inflammation, cytokine and chemokine activity, GPCR signaling, synaptic transmission
GO:0007270	neuron-neuron synaptic transmission	2	6	SLED2.6	Innate immune response, inflammation, IL1 and IL6 signaling	Inflammation, cytokine and chemokine activity, GPCR signaling, synaptic transmission
GO:0010033.split1	response to organic substance	2	6	SLED2.6	Innate immune response, inflammation, IL1 and IL6 signaling	Inflammation, cytokine and chemokine activity, GPCR signaling, synaptic transmission
GO:0031623.split3	receptor internalization	2	6	SLED2.6	Innate immune response, inflammation, IL1 and IL6 signaling	Inflammation, cytokine and chemokine activity, GPCR signaling, synaptic transmission
GO:0050768.split2	negative regulation of neurogenesis	2	6	SLED2.6	Innate immune response, inflammation, IL1 and IL6 signaling	Inflammation, cytokine and chemokine activity, GPCR signaling, synaptic transmission
GO:0055072.split5	iron ion homeostasis	2	6	SLED2.6	Innate immune response, inflammation, IL1 and IL6 signaling	Inflammation, cytokine and chemokine activity, GPCR signaling, synaptic transmission
GO:0060070.split3	canonical Wnt signaling pathway	2	6	SLED2.6	Innate immune response, inflammation, IL1 and IL6 signaling	Inflammation, cytokine and chemokine activity, GPCR signaling, synaptic transmission
GO:1990573.split3	potassium ion import across plasma membrane	2	6	SLED2.6	Innate immune response, inflammation, IL1 and IL6 signaling	Inflammation, cytokine and chemokine activity, GPCR signaling, synaptic transmission
GO:0005930.split9	axoneme	2	6	SLED2.6	Innate immune response, inflammation, IL1 and IL6 signaling	Inflammation, cytokine and chemokine activity, GPCR signaling, synaptic transmission
GO:0031514.split9	motile cilium	2	6	SLED2.6	Innate immune response, inflammation, IL1 and IL6 signaling	Inflammation, cytokine and chemokine activity, GPCR signaling, synaptic transmission
GO:0044754.split1	autolysosome	2	6	SLED2.6	Innate immune response, inflammation, IL1 and IL6 signaling	Inflammation, cytokine and chemokine activity, GPCR signaling, synaptic transmission
GO:0005125.split9	cytokine activity	2	6	SLED2.6	Innate immune response, inflammation, IL1 and IL6 signaling	Inflammation, cytokine and chemokine activity, GPCR signaling, synaptic transmission
GO:0008009.split4	chemokine activity	2	6	SLED2.6	Innate immune response, inflammation, IL1 and IL6 signaling	Inflammation, cytokine and chemokine activity, GPCR signaling, synaptic transmission
GO:0016829.split5	lyase activity	2	6	SLED2.6	Innate immune response, inflammation, IL1 and IL6 signaling	Inflammation, cytokine and chemokine activity, GPCR signaling, synaptic transmission
GO:0031681.split2	G-protein beta-subunit binding	2	6	SLED2.6	Innate immune response, inflammation, IL1 and IL6 signaling	Inflammation, cytokine and chemokine activity, GPCR signaling, synaptic transmission
R-HSA-112315.split8	Transmission across Chemical Synapses	2	6	SLED2.6	Innate immune response, inflammation, IL1 and IL6 signaling	Inflammation, cytokine and chemokine activity, GPCR signaling, synaptic transmission
R-HSA-380108.split6	Chemokine receptors bind chemokines	2	6	SLED2.6	Innate immune response, inflammation, IL1 and IL6 signaling	Inflammation, cytokine and chemokine activity, GPCR signaling, synaptic transmission
R-HSA-418594.split1	G alpha (i) signalling events	2	6	SLED2.6	Innate immune response, inflammation, IL1 and IL6 signaling	Inflammation, cytokine and chemokine activity, GPCR signaling, synaptic transmission
R-HSA-500792.split7	GPCR ligand binding	2	6	SLED2.6	Innate immune response, inflammation, IL1 and IL6 signaling	Inflammation, cytokine and chemokine activity, GPCR signaling, synaptic transmission
R-HSA-5683826.split1	Surfactant metabolism	2	6	SLED2.6	Innate immune response, inflammation, IL1 and IL6 signaling	Inflammation, cytokine and chemokine activity, GPCR signaling, synaptic transmission
hsa04976.split3	Bile secretion	2	6	SLED2.6	Innate immune response, inflammation, IL1 and IL6 signaling	Inflammation, cytokine and chemokine activity, GPCR signaling, synaptic transmission
hsa05150.split5	Staphylococcus aureus infection	2	6	SLED2.6	Innate immune response, inflammation, IL1 and IL6 signaling	Inflammation, cytokine and chemokine activity, GPCR signaling, synaptic transmission
WP2877.split6	Vitamin D receptor pathway	2	6	SLED2.6	Innate immune response, inflammation, IL1 and IL6 signaling	Inflammation, cytokine and chemokine activity, GPCR signaling, synaptic transmission
WP2884.split8	NRF2 pathway	2	6	SLED2.6	Innate immune response, inflammation, IL1 and IL6 signaling	Inflammation, cytokine and chemokine activity, GPCR signaling, synaptic transmission
WP3527.split3	Pre-implantation embryo	2	6	SLED2.6	Innate immune response, inflammation, IL1 and IL6 signaling	Inflammation, cytokine and chemokine activity, GPCR signaling, synaptic transmission
WP3594.split5	Circadian rhythm genes	2	6	SLED2.6	Innate immune response, inflammation, IL1 and IL6 signaling	Inflammation, cytokine and chemokine activity, GPCR signaling, synaptic transmission
WP4300.split1	Extracellular vesicles in the crosstalk of cardiac cells	2	6	SLED2.6	Innate immune response, inflammation, IL1 and IL6 signaling	Inflammation, cytokine and chemokine activity, GPCR signaling, synaptic transmission
M13.16	Cytokines/chemokines	2	6	SLED2.6	Innate immune response, inflammation, IL1 and IL6 signaling	Inflammation, cytokine and chemokine activity, GPCR signaling, synaptic transmission
M15.37.split2	Inflammation	2	6	SLED2.6	Innate immune response, inflammation, IL1 and IL6 signaling	Inflammation, cytokine and chemokine activity, GPCR signaling, synaptic transmission
M15.109	Inflammation	2	6	SLED2.6	Innate immune response, inflammation, IL1 and IL6 signaling	Inflammation, cytokine and chemokine activity, GPCR signaling, synaptic transmission
LI.M118.0.split4	enriched in monocytes (IV)	2	7	SLED2.7	Innate immune response, inflammation, IL1 and IL6 signaling	Neutrophils, monocytes, DCs, eosinophils, TLR4, TNF
LI.M168.split2	enriched in dendritic cells	2	7	SLED2.7	Innate immune response, inflammation, IL1 and IL6 signaling	Neutrophils, monocytes, DCs, eosinophils, TLR4, TNF
DC.M7.35.split1	Undetermined	2	7	SLED2.7	Innate immune response, inflammation, IL1 and IL6 signaling	Neutrophils, monocytes, DCs, eosinophils, TLR4, TNF
GO:0002523.split1	leukocyte migration involved in inflammatory response	2	7	SLED2.7	Innate immune response, inflammation, IL1 and IL6 signaling	Neutrophils, monocytes, DCs, eosinophils, TLR4, TNF
GO:0002526.split2	acute inflammatory response	2	7	SLED2.7	Innate immune response, inflammation, IL1 and IL6 signaling	Neutrophils, monocytes, DCs, eosinophils, TLR4, TNF
GO:0008643.split6	carbohydrate transport	2	7	SLED2.7	Innate immune response, inflammation, IL1 and IL6 signaling	Neutrophils, monocytes, DCs, eosinophils, TLR4, TNF
GO:0010951.split2	negative regulation of endopeptidase activity	2	7	SLED2.7	Innate immune response, inflammation, IL1 and IL6 signaling	Neutrophils, monocytes, DCs, eosinophils, TLR4, TNF
GO:0030593.split4	neutrophil chemotaxis	2	7	SLED2.7	Innate immune response, inflammation, IL1 and IL6 signaling	Neutrophils, monocytes, DCs, eosinophils, TLR4, TNF
GO:0031638.split1	zymogen activation	2	7	SLED2.7	Innate immune response, inflammation, IL1 and IL6 signaling	Neutrophils, monocytes, DCs, eosinophils, TLR4, TNF
GO:0032680.split2	regulation of tumor necrosis factor production	2	7	SLED2.7	Innate immune response, inflammation, IL1 and IL6 signaling	Neutrophils, monocytes, DCs, eosinophils, TLR4, TNF
GO:0042119.split1	neutrophil activation	2	7	SLED2.7	Innate immune response, inflammation, IL1 and IL6 signaling	Neutrophils, monocytes, DCs, eosinophils, TLR4, TNF
GO:0045669.split6	positive regulation of osteoblast differentiation	2	7	SLED2.7	Innate immune response, inflammation, IL1 and IL6 signaling	Neutrophils, monocytes, DCs, eosinophils, TLR4, TNF
GO:0045717.split1	negative regulation of fatty acid biosynthetic process	2	7	SLED2.7	Innate immune response, inflammation, IL1 and IL6 signaling	Neutrophils, monocytes, DCs, eosinophils, TLR4, TNF
GO:0046686.split2	response to cadmium ion	2	7	SLED2.7	Innate immune response, inflammation, IL1 and IL6 signaling	Neutrophils, monocytes, DCs, eosinophils, TLR4, TNF
GO:0048545.split1	response to steroid hormone	2	7	SLED2.7	Innate immune response, inflammation, IL1 and IL6 signaling	Neutrophils, monocytes, DCs, eosinophils, TLR4, TNF
GO:0050868.split2	negative regulation of T cell activation	2	7	SLED2.7	Innate immune response, inflammation, IL1 and IL6 signaling	Neutrophils, monocytes, DCs, eosinophils, TLR4, TNF
GO:0061760.split1	antifungal innate immune response	2	7	SLED2.7	Innate immune response, inflammation, IL1 and IL6 signaling	Neutrophils, monocytes, DCs, eosinophils, TLR4, TNF
GO:0061844.split7	antimicrobial humoral immune response mediated by antimicrobial peptide	2	7	SLED2.7	Innate immune response, inflammation, IL1 and IL6 signaling	Neutrophils, monocytes, DCs, eosinophils, TLR4, TNF
GO:0098869.split4	cellular oxidant detoxification	2	7	SLED2.7	Innate immune response, inflammation, IL1 and IL6 signaling	Neutrophils, monocytes, DCs, eosinophils, TLR4, TNF
GO:1903428.split1	positive regulation of reactive oxygen species biosynthetic process	2	7	SLED2.7	Innate immune response, inflammation, IL1 and IL6 signaling	Neutrophils, monocytes, DCs, eosinophils, TLR4, TNF
GO:0016324.split10	apical plasma membrane	2	7	SLED2.7	Innate immune response, inflammation, IL1 and IL6 signaling	Neutrophils, monocytes, DCs, eosinophils, TLR4, TNF
GO:0030658.split4	transport vesicle membrane	2	7	SLED2.7	Innate immune response, inflammation, IL1 and IL6 signaling	Neutrophils, monocytes, DCs, eosinophils, TLR4, TNF
GO:0062023.split6	collagen-containing extracellular matrix	2	7	SLED2.7	Innate immune response, inflammation, IL1 and IL6 signaling	Neutrophils, monocytes, DCs, eosinophils, TLR4, TNF
GO:0001530.split1	lipopolysaccharide binding	2	7	SLED2.7	Innate immune response, inflammation, IL1 and IL6 signaling	Neutrophils, monocytes, DCs, eosinophils, TLR4, TNF
GO:0002020.split1	protease binding	2	7	SLED2.7	Innate immune response, inflammation, IL1 and IL6 signaling	Neutrophils, monocytes, DCs, eosinophils, TLR4, TNF
GO:0035662	Toll-like receptor 4 binding	2	7	SLED2.7	Innate immune response, inflammation, IL1 and IL6 signaling	Neutrophils, monocytes, DCs, eosinophils, TLR4, TNF
GO:0048306.split6	calcium-dependent protein binding	2	7	SLED2.7	Innate immune response, inflammation, IL1 and IL6 signaling	Neutrophils, monocytes, DCs, eosinophils, TLR4, TNF
GO:0050544	arachidonic acid binding	2	7	SLED2.7	Innate immune response, inflammation, IL1 and IL6 signaling	Neutrophils, monocytes, DCs, eosinophils, TLR4, TNF
R-HSA-1474244.split2	Extracellular matrix organization	2	7	SLED2.7	Innate immune response, inflammation, IL1 and IL6 signaling	Neutrophils, monocytes, DCs, eosinophils, TLR4, TNF
R-HSA-189200.split3	Cellular hexose transport	2	7	SLED2.7	Innate immune response, inflammation, IL1 and IL6 signaling	Neutrophils, monocytes, DCs, eosinophils, TLR4, TNF
R-HSA-381426.split2	Regulation of Insulin-like Growth Factor (IGF) transport and uptake by Insulin-like Growth Factor Binding Proteins (IGFBPs)	2	7	SLED2.7	Innate immune response, inflammation, IL1 and IL6 signaling	Neutrophils, monocytes, DCs, eosinophils, TLR4, TNF
R-HSA-9614085.split3	FOXO-mediated transcription	2	7	SLED2.7	Innate immune response, inflammation, IL1 and IL6 signaling	Neutrophils, monocytes, DCs, eosinophils, TLR4, TNF
R-HSA-9660826.split2	Purinergic signaling in leishmaniasis infection	2	7	SLED2.7	Innate immune response, inflammation, IL1 and IL6 signaling	Neutrophils, monocytes, DCs, eosinophils, TLR4, TNF
hsa04614.split3	Renin-angiotensin system	2	7	SLED2.7	Innate immune response, inflammation, IL1 and IL6 signaling	Neutrophils, monocytes, DCs, eosinophils, TLR4, TNF
WP15.split6	Selenium micronutrient network	2	7	SLED2.7	Innate immune response, inflammation, IL1 and IL6 signaling	Neutrophils, monocytes, DCs, eosinophils, TLR4, TNF
WP4564.split4	Neural crest cell migration during development	2	7	SLED2.7	Innate immune response, inflammation, IL1 and IL6 signaling	Neutrophils, monocytes, DCs, eosinophils, TLR4, TNF
WP4565.split4	Neural crest cell migration in cancer	2	7	SLED2.7	Innate immune response, inflammation, IL1 and IL6 signaling	Neutrophils, monocytes, DCs, eosinophils, TLR4, TNF
M14.28.split2	Neutrophils	2	7	SLED2.7	Innate immune response, inflammation, IL1 and IL6 signaling	Neutrophils, monocytes, DCs, eosinophils, TLR4, TNF
M16.47.split2	TNF	2	7	SLED2.7	Innate immune response, inflammation, IL1 and IL6 signaling	Neutrophils, monocytes, DCs, eosinophils, TLR4, TNF
Eosinophils.split1	Eosinophils	2	7	SLED2.7	Innate immune response, inflammation, IL1 and IL6 signaling	Neutrophils, monocytes, DCs, eosinophils, TLR4, TNF
LI.S1.split2	NK cell surface signature	2	8	SLED2.8	Innate immune response, inflammation, IL1 and IL6 signaling	IL18, NK cells
GO:0006813.split7	potassium ion transport	2	8	SLED2.8	Innate immune response, inflammation, IL1 and IL6 signaling	IL18, NK cells
GO:0006814.split8	sodium ion transport	2	8	SLED2.8	Innate immune response, inflammation, IL1 and IL6 signaling	IL18, NK cells
GO:0034765.split6	regulation of ion transmembrane transport	2	8	SLED2.8	Innate immune response, inflammation, IL1 and IL6 signaling	IL18, NK cells
GO:0035655	interleukin-18-mediated signaling pathway	2	8	SLED2.8	Innate immune response, inflammation, IL1 and IL6 signaling	IL18, NK cells
GO:0046835.split2	carbohydrate phosphorylation	2	8	SLED2.8	Innate immune response, inflammation, IL1 and IL6 signaling	IL18, NK cells
GO:0071805.split6	potassium ion transmembrane transport	2	8	SLED2.8	Innate immune response, inflammation, IL1 and IL6 signaling	IL18, NK cells
GO:0086091.split4	regulation of heart rate by cardiac conduction	2	8	SLED2.8	Innate immune response, inflammation, IL1 and IL6 signaling	IL18, NK cells
GO:0090502.split6	RNA phosphodiester bond hydrolysis, endonucleolytic	2	8	SLED2.8	Innate immune response, inflammation, IL1 and IL6 signaling	IL18, NK cells
GO:0008076.split1	voltage-gated potassium channel complex	2	8	SLED2.8	Innate immune response, inflammation, IL1 and IL6 signaling	IL18, NK cells
R-HSA-397014.split4	Muscle contraction	2	8	SLED2.8	Innate immune response, inflammation, IL1 and IL6 signaling	IL18, NK cells
R-HSA-5576891.split4	Cardiac conduction	2	8	SLED2.8	Innate immune response, inflammation, IL1 and IL6 signaling	IL18, NK cells
hsa05218.split7	Melanoma	2	8	SLED2.8	Innate immune response, inflammation, IL1 and IL6 signaling	IL18, NK cells
M14.7.split4	TBD	2	8	SLED2.8	Innate immune response, inflammation, IL1 and IL6 signaling	IL18, NK cells
LI.M3.split4	regulation of signal transduction	3	1	SLED3.1	CD4 T cell differentiation and activation	Thymic T cell proliferation and differentiation, CD4 Tem, IL2, IL4
LI.M126.split2	double positive thymocytes	3	1	SLED3.1	CD4 T cell differentiation and activation	Thymic T cell proliferation and differentiation, CD4 Tem, IL2, IL4
LI.S0.split2	T cell surface signature	3	1	SLED3.1	CD4 T cell differentiation and activation	Thymic T cell proliferation and differentiation, CD4 Tem, IL2, IL4
DC.M4.1.split1	T cell	3	1	SLED3.1	CD4 T cell differentiation and activation	Thymic T cell proliferation and differentiation, CD4 Tem, IL2, IL4
GO:0031295.split3	T cell costimulation	3	1	SLED3.1	CD4 T cell differentiation and activation	Thymic T cell proliferation and differentiation, CD4 Tem, IL2, IL4
GO:0032743.split3	positive regulation of interleukin-2 production	3	1	SLED3.1	CD4 T cell differentiation and activation	Thymic T cell proliferation and differentiation, CD4 Tem, IL2, IL4
GO:0032753.split1	positive regulation of interleukin-4 production	3	1	SLED3.1	CD4 T cell differentiation and activation	Thymic T cell proliferation and differentiation, CD4 Tem, IL2, IL4
GO:0033077.split2	T cell differentiation in thymus	3	1	SLED3.1	CD4 T cell differentiation and activation	Thymic T cell proliferation and differentiation, CD4 Tem, IL2, IL4
GO:0042102.split2	positive regulation of T cell proliferation	3	1	SLED3.1	CD4 T cell differentiation and activation	Thymic T cell proliferation and differentiation, CD4 Tem, IL2, IL4
GO:0045060.split1	negative thymic T cell selection	3	1	SLED3.1	CD4 T cell differentiation and activation	Thymic T cell proliferation and differentiation, CD4 Tem, IL2, IL4
GO:0046641.split1	positive regulation of alpha-beta T cell proliferation	3	1	SLED3.1	CD4 T cell differentiation and activation	Thymic T cell proliferation and differentiation, CD4 Tem, IL2, IL4
GO:0009897.split12	external side of plasma membrane	3	1	SLED3.1	CD4 T cell differentiation and activation	Thymic T cell proliferation and differentiation, CD4 Tem, IL2, IL4
hsa05340.split1	Primary immunodeficiency	3	1	SLED3.1	CD4 T cell differentiation and activation	Thymic T cell proliferation and differentiation, CD4 Tem, IL2, IL4
WP3893.split2	Development and heterogeneity of the ILC family	3	1	SLED3.1	CD4 T cell differentiation and activation	Thymic T cell proliferation and differentiation, CD4 Tem, IL2, IL4
M12.6.split2	T cells	3	1	SLED3.1	CD4 T cell differentiation and activation	Thymic T cell proliferation and differentiation, CD4 Tem, IL2, IL4
M13.27.split1	Lymphocytes	3	1	SLED3.1	CD4 T cell differentiation and activation	Thymic T cell proliferation and differentiation, CD4 Tem, IL2, IL4
M15.38.split1	T cells	3	1	SLED3.1	CD4 T cell differentiation and activation	Thymic T cell proliferation and differentiation, CD4 Tem, IL2, IL4
CD4pos_Tem.split3	CD4pos_Tem	3	1	SLED3.1	CD4 T cell differentiation and activation	Thymic T cell proliferation and differentiation, CD4 Tem, IL2, IL4
LI.M5.1.split1	T cell activation and signaling	3	2	SLED3.2	CD4 T cell differentiation and activation	CD4 naÃ¯ve T cells and Tcm, T cell activation, NK cells, IL2, IL7, TCR, IL17
LI.M7.0.split1	enriched in T cells (I)	3	2	SLED3.2	CD4 T cell differentiation and activation	CD4 naÃ¯ve T cells and Tcm, T cell activation, NK cells, IL2, IL7, TCR, IL17
LI.M7.1.split1	T cell activation (I)	3	2	SLED3.2	CD4 T cell differentiation and activation	CD4 naÃ¯ve T cells and Tcm, T cell activation, NK cells, IL2, IL7, TCR, IL17
LI.M7.3.split2	T cell activation (II)	3	2	SLED3.2	CD4 T cell differentiation and activation	CD4 naÃ¯ve T cells and Tcm, T cell activation, NK cells, IL2, IL7, TCR, IL17
LI.M7.4.split1	T cell activation (III)	3	2	SLED3.2	CD4 T cell differentiation and activation	CD4 naÃ¯ve T cells and Tcm, T cell activation, NK cells, IL2, IL7, TCR, IL17
LI.M14.split1	T cell differentiation	3	2	SLED3.2	CD4 T cell differentiation and activation	CD4 naÃ¯ve T cells and Tcm, T cell activation, NK cells, IL2, IL7, TCR, IL17
LI.M18.split2	T cell differentiation via ITK and PKC	3	2	SLED3.2	CD4 T cell differentiation and activation	CD4 naÃ¯ve T cells and Tcm, T cell activation, NK cells, IL2, IL7, TCR, IL17
LI.M61.2.split2	enriched in NK cells (receptor activation)	3	2	SLED3.2	CD4 T cell differentiation and activation	CD4 naÃ¯ve T cells and Tcm, T cell activation, NK cells, IL2, IL7, TCR, IL17
LI.M65.split1	IL2, IL7, TCR network	3	2	SLED3.2	CD4 T cell differentiation and activation	CD4 naÃ¯ve T cells and Tcm, T cell activation, NK cells, IL2, IL7, TCR, IL17
LI.M157.split2	enriched in NK cells (III)	3	2	SLED3.2	CD4 T cell differentiation and activation	CD4 naÃ¯ve T cells and Tcm, T cell activation, NK cells, IL2, IL7, TCR, IL17
DC.M4.15.split1	T cells	3	2	SLED3.2	CD4 T cell differentiation and activation	CD4 naÃ¯ve T cells and Tcm, T cell activation, NK cells, IL2, IL7, TCR, IL17
GO:0032740.split3	positive regulation of interleukin-17 production	3	2	SLED3.2	CD4 T cell differentiation and activation	CD4 naÃ¯ve T cells and Tcm, T cell activation, NK cells, IL2, IL7, TCR, IL17
GO:0042110.split2	T cell activation	3	2	SLED3.2	CD4 T cell differentiation and activation	CD4 naÃ¯ve T cells and Tcm, T cell activation, NK cells, IL2, IL7, TCR, IL17
GO:0046649	lymphocyte activation	3	2	SLED3.2	CD4 T cell differentiation and activation	CD4 naÃ¯ve T cells and Tcm, T cell activation, NK cells, IL2, IL7, TCR, IL17
GO:0001772.split1	immunological synapse	3	2	SLED3.2	CD4 T cell differentiation and activation	CD4 naÃ¯ve T cells and Tcm, T cell activation, NK cells, IL2, IL7, TCR, IL17
R-HSA-114508.split2	Effects of PIP2 hydrolysis	3	2	SLED3.2	CD4 T cell differentiation and activation	CD4 naÃ¯ve T cells and Tcm, T cell activation, NK cells, IL2, IL7, TCR, IL17
R-HSA-202403.split3	TCR signaling	3	2	SLED3.2	CD4 T cell differentiation and activation	CD4 naÃ¯ve T cells and Tcm, T cell activation, NK cells, IL2, IL7, TCR, IL17
R-HSA-388841.split5	Costimulation by the CD28 family	3	2	SLED3.2	CD4 T cell differentiation and activation	CD4 naÃ¯ve T cells and Tcm, T cell activation, NK cells, IL2, IL7, TCR, IL17
hsa04658.split2	Th1 and Th2 cell differentiation	3	2	SLED3.2	CD4 T cell differentiation and activation	CD4 naÃ¯ve T cells and Tcm, T cell activation, NK cells, IL2, IL7, TCR, IL17
hsa04659.split4	Th17 cell differentiation	3	2	SLED3.2	CD4 T cell differentiation and activation	CD4 naÃ¯ve T cells and Tcm, T cell activation, NK cells, IL2, IL7, TCR, IL17
hsa04660.split1	T cell receptor signaling pathway	3	2	SLED3.2	CD4 T cell differentiation and activation	CD4 naÃ¯ve T cells and Tcm, T cell activation, NK cells, IL2, IL7, TCR, IL17
hsa05235.split3	PD-L1 expression and PD-1 checkpoint pathway in cancer	3	2	SLED3.2	CD4 T cell differentiation and activation	CD4 naÃ¯ve T cells and Tcm, T cell activation, NK cells, IL2, IL7, TCR, IL17
WP453.split4	Inflammatory response pathway	3	2	SLED3.2	CD4 T cell differentiation and activation	CD4 naÃ¯ve T cells and Tcm, T cell activation, NK cells, IL2, IL7, TCR, IL17
WP5072.split2	Modulators of TCR signaling and T cell activation	3	2	SLED3.2	CD4 T cell differentiation and activation	CD4 naÃ¯ve T cells and Tcm, T cell activation, NK cells, IL2, IL7, TCR, IL17
WP5098.split2	T-cell activation SARS-CoV-2	3	2	SLED3.2	CD4 T cell differentiation and activation	CD4 naÃ¯ve T cells and Tcm, T cell activation, NK cells, IL2, IL7, TCR, IL17
WP69.split1	T-cell receptor (TCR) signaling pathway	3	2	SLED3.2	CD4 T cell differentiation and activation	CD4 naÃ¯ve T cells and Tcm, T cell activation, NK cells, IL2, IL7, TCR, IL17
M13.27.split2	Lymphocytes	3	2	SLED3.2	CD4 T cell differentiation and activation	CD4 naÃ¯ve T cells and Tcm, T cell activation, NK cells, IL2, IL7, TCR, IL17
CD4pos_naive_T_cells.split1	CD4pos_naive_T_cells	3	2	SLED3.2	CD4 T cell differentiation and activation	CD4 naÃ¯ve T cells and Tcm, T cell activation, NK cells, IL2, IL7, TCR, IL17
CD4pos_Tcm.split4	CD4pos_Tcm	3	2	SLED3.2	CD4 T cell differentiation and activation	CD4 naÃ¯ve T cells and Tcm, T cell activation, NK cells, IL2, IL7, TCR, IL17
LI.M7.4.split2	T cell activation (III)	3	3	SLED3.3	CD4 T cell differentiation and activation	T cell differentiation and activation, TCR, mTOR, NF-kB, Wnt, Hippo, CD28 dependent PI3K/Akt signaling
LI.M14.split2	T cell differentiation	3	3	SLED3.3	CD4 T cell differentiation and activation	T cell differentiation and activation, TCR, mTOR, NF-kB, Wnt, Hippo, CD28 dependent PI3K/Akt signaling
LI.M39.split2	integrin mediated leukocyte migration	3	3	SLED3.3	CD4 T cell differentiation and activation	T cell differentiation and activation, TCR, mTOR, NF-kB, Wnt, Hippo, CD28 dependent PI3K/Akt signaling
LI.M109.split1	receptors, cell migration	3	3	SLED3.3	CD4 T cell differentiation and activation	T cell differentiation and activation, TCR, mTOR, NF-kB, Wnt, Hippo, CD28 dependent PI3K/Akt signaling
LI.M223.split1	enriched in T cells (II)	3	3	SLED3.3	CD4 T cell differentiation and activation	T cell differentiation and activation, TCR, mTOR, NF-kB, Wnt, Hippo, CD28 dependent PI3K/Akt signaling
DC.M7.12.split1	Undetermined	3	3	SLED3.3	CD4 T cell differentiation and activation	T cell differentiation and activation, TCR, mTOR, NF-kB, Wnt, Hippo, CD28 dependent PI3K/Akt signaling
GO:0030217.split1	T cell differentiation	3	3	SLED3.3	CD4 T cell differentiation and activation	T cell differentiation and activation, TCR, mTOR, NF-kB, Wnt, Hippo, CD28 dependent PI3K/Akt signaling
GO:0030509.split8	BMP signaling pathway	3	3	SLED3.3	CD4 T cell differentiation and activation	T cell differentiation and activation, TCR, mTOR, NF-kB, Wnt, Hippo, CD28 dependent PI3K/Akt signaling
GO:0042100.split1	B cell proliferation	3	3	SLED3.3	CD4 T cell differentiation and activation	T cell differentiation and activation, TCR, mTOR, NF-kB, Wnt, Hippo, CD28 dependent PI3K/Akt signaling
GO:0045785.split3	positive regulation of cell adhesion	3	3	SLED3.3	CD4 T cell differentiation and activation	T cell differentiation and activation, TCR, mTOR, NF-kB, Wnt, Hippo, CD28 dependent PI3K/Akt signaling
GO:0046330.split3	positive regulation of JNK cascade	3	3	SLED3.3	CD4 T cell differentiation and activation	T cell differentiation and activation, TCR, mTOR, NF-kB, Wnt, Hippo, CD28 dependent PI3K/Akt signaling
GO:0048545.split2	response to steroid hormone	3	3	SLED3.3	CD4 T cell differentiation and activation	T cell differentiation and activation, TCR, mTOR, NF-kB, Wnt, Hippo, CD28 dependent PI3K/Akt signaling
GO:0048872.split1	homeostasis of number of cells	3	3	SLED3.3	CD4 T cell differentiation and activation	T cell differentiation and activation, TCR, mTOR, NF-kB, Wnt, Hippo, CD28 dependent PI3K/Akt signaling
GO:0050852.split2	T cell receptor signaling pathway	3	3	SLED3.3	CD4 T cell differentiation and activation	T cell differentiation and activation, TCR, mTOR, NF-kB, Wnt, Hippo, CD28 dependent PI3K/Akt signaling
GO:0032993.split1	protein-DNA complex	3	3	SLED3.3	CD4 T cell differentiation and activation	T cell differentiation and activation, TCR, mTOR, NF-kB, Wnt, Hippo, CD28 dependent PI3K/Akt signaling
R-HSA-2187338.split9	Visual phototransduction	3	3	SLED3.3	CD4 T cell differentiation and activation	T cell differentiation and activation, TCR, mTOR, NF-kB, Wnt, Hippo, CD28 dependent PI3K/Akt signaling
R-HSA-2514859.split2	Inactivation, recovery and regulation of the phototransduction cascade	3	3	SLED3.3	CD4 T cell differentiation and activation	T cell differentiation and activation, TCR, mTOR, NF-kB, Wnt, Hippo, CD28 dependent PI3K/Akt signaling
R-HSA-2871837.split2	FCERI mediated NF-kB activation	3	3	SLED3.3	CD4 T cell differentiation and activation	T cell differentiation and activation, TCR, mTOR, NF-kB, Wnt, Hippo, CD28 dependent PI3K/Akt signaling
R-HSA-389357.split1	CD28 dependent PI3K/Akt signaling	3	3	SLED3.3	CD4 T cell differentiation and activation	T cell differentiation and activation, TCR, mTOR, NF-kB, Wnt, Hippo, CD28 dependent PI3K/Akt signaling
R-HSA-418597.split5	G alpha (z) signalling events	3	3	SLED3.3	CD4 T cell differentiation and activation	T cell differentiation and activation, TCR, mTOR, NF-kB, Wnt, Hippo, CD28 dependent PI3K/Akt signaling
hsa04150.split7	mTOR signaling pathway	3	3	SLED3.3	CD4 T cell differentiation and activation	T cell differentiation and activation, TCR, mTOR, NF-kB, Wnt, Hippo, CD28 dependent PI3K/Akt signaling
hsa04520.split8	Adherens junction	3	3	SLED3.3	CD4 T cell differentiation and activation	T cell differentiation and activation, TCR, mTOR, NF-kB, Wnt, Hippo, CD28 dependent PI3K/Akt signaling
hsa05216.split2	Thyroid cancer	3	3	SLED3.3	CD4 T cell differentiation and activation	T cell differentiation and activation, TCR, mTOR, NF-kB, Wnt, Hippo, CD28 dependent PI3K/Akt signaling
WP2839.split5	Hair follicle development: organogenesis - part 2 of 3	3	3	SLED3.3	CD4 T cell differentiation and activation	T cell differentiation and activation, TCR, mTOR, NF-kB, Wnt, Hippo, CD28 dependent PI3K/Akt signaling
WP399.split2	Wnt signaling pathway and pluripotency	3	3	SLED3.3	CD4 T cell differentiation and activation	T cell differentiation and activation, TCR, mTOR, NF-kB, Wnt, Hippo, CD28 dependent PI3K/Akt signaling
WP4540.split4	Hippo signaling regulation pathways	3	3	SLED3.3	CD4 T cell differentiation and activation	T cell differentiation and activation, TCR, mTOR, NF-kB, Wnt, Hippo, CD28 dependent PI3K/Akt signaling
WP4787.split1	Osteoblast differentiation and related diseases	3	3	SLED3.3	CD4 T cell differentiation and activation	T cell differentiation and activation, TCR, mTOR, NF-kB, Wnt, Hippo, CD28 dependent PI3K/Akt signaling
LI.M12.split1	CD28 costimulation	3	4	SLED3.4	CD4 T cell differentiation and activation	CD4 Tcm, PI3K/AKT signaling
GO:0098609.split9	cell-cell adhesion	3	4	SLED3.4	CD4 T cell differentiation and activation	CD4 Tcm, PI3K/AKT signaling
R-HSA-2219530.split3	Constitutive Signaling by Aberrant PI3K in Cancer	3	4	SLED3.4	CD4 T cell differentiation and activation	CD4 Tcm, PI3K/AKT signaling
hsa04672.split4	Intestinal immune network for IgA production	3	4	SLED3.4	CD4 T cell differentiation and activation	CD4 Tcm, PI3K/AKT signaling
WP3863.split1	T-cell antigen receptor (TCR) pathway during Staphylococcus aureus infection	3	4	SLED3.4	CD4 T cell differentiation and activation	CD4 Tcm, PI3K/AKT signaling
CD4pos_T_cells.split3	CD4pos_T_cells	3	4	SLED3.4	CD4 T cell differentiation and activation	CD4 Tcm, PI3K/AKT signaling
CD4pos_Tcm.split1	CD4pos_Tcm	3	4	SLED3.4	CD4 T cell differentiation and activation	CD4 Tcm, PI3K/AKT signaling
LI.M18.split1	T cell differentiation via ITK and PKC	3	5	SLED3.5	CD4 T cell differentiation and activation	T cell differentiation and activation, CD8 Tcm, Tregs, positive regulation of IFN gamma production
LI.M19.split1	T cell differentiation (Th2)	3	5	SLED3.5	CD4 T cell differentiation and activation	T cell differentiation and activation, CD8 Tcm, Tregs, positive regulation of IFN gamma production
LI.M62.0.split4	T & B cell development, activation	3	5	SLED3.5	CD4 T cell differentiation and activation	T cell differentiation and activation, CD8 Tcm, Tregs, positive regulation of IFN gamma production
LI.S0.split3	T cell surface signature	3	5	SLED3.5	CD4 T cell differentiation and activation	T cell differentiation and activation, CD8 Tcm, Tregs, positive regulation of IFN gamma production
GO:0002250.split1	adaptive immune response	3	5	SLED3.5	CD4 T cell differentiation and activation	T cell differentiation and activation, CD8 Tcm, Tregs, positive regulation of IFN gamma production
GO:0032729.split5	positive regulation of interferon-gamma production	3	5	SLED3.5	CD4 T cell differentiation and activation	T cell differentiation and activation, CD8 Tcm, Tregs, positive regulation of IFN gamma production
GO:0005911.split5	cell-cell junction	3	5	SLED3.5	CD4 T cell differentiation and activation	T cell differentiation and activation, CD8 Tcm, Tregs, positive regulation of IFN gamma production
GO:0042101.split1	T cell receptor complex	3	5	SLED3.5	CD4 T cell differentiation and activation	T cell differentiation and activation, CD8 Tcm, Tregs, positive regulation of IFN gamma production
GO:0042105	alpha-beta T cell receptor complex	3	5	SLED3.5	CD4 T cell differentiation and activation	T cell differentiation and activation, CD8 Tcm, Tregs, positive regulation of IFN gamma production
hsa04514.split3	Cell adhesion molecules	3	5	SLED3.5	CD4 T cell differentiation and activation	T cell differentiation and activation, CD8 Tcm, Tregs, positive regulation of IFN gamma production
WP2583.split1	T cell receptor and co-stimulatory signaling	3	5	SLED3.5	CD4 T cell differentiation and activation	T cell differentiation and activation, CD8 Tcm, Tregs, positive regulation of IFN gamma production
WP4585.split3	Cancer immunotherapy by PD-1 blockade	3	5	SLED3.5	CD4 T cell differentiation and activation	T cell differentiation and activation, CD8 Tcm, Tregs, positive regulation of IFN gamma production
WP4884.split2	Pathogenesis of SARS-CoV-2 mediated by nsp9-nsp10 complex	3	5	SLED3.5	CD4 T cell differentiation and activation	T cell differentiation and activation, CD8 Tcm, Tregs, positive regulation of IFN gamma production
CD8pos_Tcm.split2	CD8pos_Tcm	3	5	SLED3.5	CD4 T cell differentiation and activation	T cell differentiation and activation, CD8 Tcm, Tregs, positive regulation of IFN gamma production
Tregs.split3	Tregs	3	5	SLED3.5	CD4 T cell differentiation and activation	T cell differentiation and activation, CD8 Tcm, Tregs, positive regulation of IFN gamma production
LI.M19.split2	T cell differentiation (Th2)	3	6	SLED3.6	CD4 T cell differentiation and activation	Th2 cell differentiation, CD4 Tem, CD8 T cells
DC.M4.7.split3	Cell Cycle	3	6	SLED3.6	CD4 T cell differentiation and activation	Th2 cell differentiation, CD4 Tem, CD8 T cells
DC.M4.15.split2	T cells	3	6	SLED3.6	CD4 T cell differentiation and activation	Th2 cell differentiation, CD4 Tem, CD8 T cells
DC.M6.19.split1	Undetermined	3	6	SLED3.6	CD4 T cell differentiation and activation	Th2 cell differentiation, CD4 Tem, CD8 T cells
DC.M8.108	Undetermined	3	6	SLED3.6	CD4 T cell differentiation and activation	Th2 cell differentiation, CD4 Tem, CD8 T cells
GO:0001817.split2	regulation of cytokine production	3	6	SLED3.6	CD4 T cell differentiation and activation	Th2 cell differentiation, CD4 Tem, CD8 T cells
GO:0001819.split2	positive regulation of cytokine production	3	6	SLED3.6	CD4 T cell differentiation and activation	Th2 cell differentiation, CD4 Tem, CD8 T cells
GO:0007155.split2	cell adhesion	3	6	SLED3.6	CD4 T cell differentiation and activation	Th2 cell differentiation, CD4 Tem, CD8 T cells
GO:0007265.split4	Ras protein signal transduction	3	6	SLED3.6	CD4 T cell differentiation and activation	Th2 cell differentiation, CD4 Tem, CD8 T cells
GO:0008284.split11	positive regulation of cell population proliferation	3	6	SLED3.6	CD4 T cell differentiation and activation	Th2 cell differentiation, CD4 Tem, CD8 T cells
GO:0032695.split1	negative regulation of interleukin-12 production	3	6	SLED3.6	CD4 T cell differentiation and activation	Th2 cell differentiation, CD4 Tem, CD8 T cells
GO:0032720.split3	negative regulation of tumor necrosis factor production	3	6	SLED3.6	CD4 T cell differentiation and activation	Th2 cell differentiation, CD4 Tem, CD8 T cells
GO:0097190.split1	apoptotic signaling pathway	3	6	SLED3.6	CD4 T cell differentiation and activation	Th2 cell differentiation, CD4 Tem, CD8 T cells
GO:0031234.split1	extrinsic component of cytoplasmic side of plasma membrane	3	6	SLED3.6	CD4 T cell differentiation and activation	Th2 cell differentiation, CD4 Tem, CD8 T cells
GO:0045121.split2	membrane raft	3	6	SLED3.6	CD4 T cell differentiation and activation	Th2 cell differentiation, CD4 Tem, CD8 T cells
GO:0019901.split8	protein kinase binding	3	6	SLED3.6	CD4 T cell differentiation and activation	Th2 cell differentiation, CD4 Tem, CD8 T cells
GO:0030971.split7	receptor tyrosine kinase binding	3	6	SLED3.6	CD4 T cell differentiation and activation	Th2 cell differentiation, CD4 Tem, CD8 T cells
GO:0042169.split4	SH2 domain binding	3	6	SLED3.6	CD4 T cell differentiation and activation	Th2 cell differentiation, CD4 Tem, CD8 T cells
R-HSA-199418.split3	Negative regulation of the PI3K/AKT network	3	6	SLED3.6	CD4 T cell differentiation and activation	Th2 cell differentiation, CD4 Tem, CD8 T cells
R-HSA-2219528.split5	PI3K/AKT Signaling in Cancer	3	6	SLED3.6	CD4 T cell differentiation and activation	Th2 cell differentiation, CD4 Tem, CD8 T cells
R-HSA-9648002.split4	RAS processing	3	6	SLED3.6	CD4 T cell differentiation and activation	Th2 cell differentiation, CD4 Tem, CD8 T cells
hsa04630.split4	JAK-STAT signaling pathway	3	6	SLED3.6	CD4 T cell differentiation and activation	Th2 cell differentiation, CD4 Tem, CD8 T cells
WP5121.split2	Sphingolipid metabolism in senescence	3	6	SLED3.6	CD4 T cell differentiation and activation	Th2 cell differentiation, CD4 Tem, CD8 T cells
M12.6.split3	T cells	3	6	SLED3.6	CD4 T cell differentiation and activation	Th2 cell differentiation, CD4 Tem, CD8 T cells
M14.8.split2	TBD	3	6	SLED3.6	CD4 T cell differentiation and activation	Th2 cell differentiation, CD4 Tem, CD8 T cells
M15.38.split2	T cells	3	6	SLED3.6	CD4 T cell differentiation and activation	Th2 cell differentiation, CD4 Tem, CD8 T cells
CD4pos_Tem.split9	CD4pos_Tem	3	6	SLED3.6	CD4 T cell differentiation and activation	Th2 cell differentiation, CD4 Tem, CD8 T cells
CD8pos_T_cells.split5	CD8pos_T_cells	3	6	SLED3.6	CD4 T cell differentiation and activation	Th2 cell differentiation, CD4 Tem, CD8 T cells
LI.M47.4.split1	enriched in B cells (V)	3	7	SLED3.7	CD4 T cell differentiation and activation	GPCR signaling, chemotaxis, B cells
GO:0007186.split4	G protein-coupled receptor signaling pathway	3	7	SLED3.7	CD4 T cell differentiation and activation	GPCR signaling, chemotaxis, B cells
GO:0030595.split2	leukocyte chemotaxis	3	7	SLED3.7	CD4 T cell differentiation and activation	GPCR signaling, chemotaxis, B cells
GO:0035025.split2	positive regulation of Rho protein signal transduction	3	7	SLED3.7	CD4 T cell differentiation and activation	GPCR signaling, chemotaxis, B cells
GO:0051482.split2	positive regulation of cytosolic calcium ion concentration involved in phospholipase C-activating G protein-coupled signaling pathway	3	7	SLED3.7	CD4 T cell differentiation and activation	GPCR signaling, chemotaxis, B cells
GO:0060326.split2	cell chemotaxis	3	7	SLED3.7	CD4 T cell differentiation and activation	GPCR signaling, chemotaxis, B cells
GO:0004930.split13	G protein-coupled receptor activity	3	7	SLED3.7	CD4 T cell differentiation and activation	GPCR signaling, chemotaxis, B cells
GO:0043274.split1	phospholipase binding	3	7	SLED3.7	CD4 T cell differentiation and activation	GPCR signaling, chemotaxis, B cells
R-HSA-373076.split4	Class A/1 (Rhodopsin-like receptors)	3	7	SLED3.7	CD4 T cell differentiation and activation	GPCR signaling, chemotaxis, B cells
R-HSA-418594.split6	G alpha (i) signalling events	3	7	SLED3.7	CD4 T cell differentiation and activation	GPCR signaling, chemotaxis, B cells
WP117.split6	GPCRs, other	3	7	SLED3.7	CD4 T cell differentiation and activation	GPCR signaling, chemotaxis, B cells
WP455.split10	GPCRs, class A rhodopsin-like	3	7	SLED3.7	CD4 T cell differentiation and activation	GPCR signaling, chemotaxis, B cells
LI.M62.0.split6	T & B cell development, activation	3	8	SLED3.8	CD4 T cell differentiation and activation	T cells, IL12, response to IL4, Wnt signaling
GO:0001954.split1	positive regulation of cell-matrix adhesion	3	8	SLED3.8	CD4 T cell differentiation and activation	T cells, IL12, response to IL4, Wnt signaling
GO:0006955.split5	immune response	3	8	SLED3.8	CD4 T cell differentiation and activation	T cells, IL12, response to IL4, Wnt signaling
GO:0032735.split1	positive regulation of interleukin-12 production	3	8	SLED3.8	CD4 T cell differentiation and activation	T cells, IL12, response to IL4, Wnt signaling
GO:0045860.split1	positive regulation of protein kinase activity	3	8	SLED3.8	CD4 T cell differentiation and activation	T cells, IL12, response to IL4, Wnt signaling
GO:0051209.split3	release of sequestered calcium ion into cytosol	3	8	SLED3.8	CD4 T cell differentiation and activation	T cells, IL12, response to IL4, Wnt signaling
GO:0071353.split2	cellular response to interleukin-4	3	8	SLED3.8	CD4 T cell differentiation and activation	T cells, IL12, response to IL4, Wnt signaling
GO:0004888.split10	transmembrane signaling receptor activity	3	8	SLED3.8	CD4 T cell differentiation and activation	T cells, IL12, response to IL4, Wnt signaling
GO:0005125.split8	cytokine activity	3	8	SLED3.8	CD4 T cell differentiation and activation	T cells, IL12, response to IL4, Wnt signaling
GO:0030159.split3	signaling receptor complex adaptor activity	3	8	SLED3.8	CD4 T cell differentiation and activation	T cells, IL12, response to IL4, Wnt signaling
GO:0038023.split5	signaling receptor activity	3	8	SLED3.8	CD4 T cell differentiation and activation	T cells, IL12, response to IL4, Wnt signaling
R-HSA-1500931.split7	Cell-Cell communication	3	8	SLED3.8	CD4 T cell differentiation and activation	T cells, IL12, response to IL4, Wnt signaling
hsa04911.split7	Insulin secretion	3	8	SLED3.8	CD4 T cell differentiation and activation	T cells, IL12, response to IL4, Wnt signaling
hsa04918.split2	Thyroid hormone synthesis	3	8	SLED3.8	CD4 T cell differentiation and activation	T cells, IL12, response to IL4, Wnt signaling
WP2840.split4	Hair follicle development: cytodifferentiation - part 3 of 3	3	8	SLED3.8	CD4 T cell differentiation and activation	T cells, IL12, response to IL4, Wnt signaling
WP428.split4	Wnt signaling	3	8	SLED3.8	CD4 T cell differentiation and activation	T cells, IL12, response to IL4, Wnt signaling
WP4545.split2	Oxysterols derived from cholesterol	3	8	SLED3.8	CD4 T cell differentiation and activation	T cells, IL12, response to IL4, Wnt signaling
WP534.split1	Glycolysis and gluconeogenesis	3	8	SLED3.8	CD4 T cell differentiation and activation	T cells, IL12, response to IL4, Wnt signaling
M12.6.split1	T cells	3	8	SLED3.8	CD4 T cell differentiation and activation	T cells, IL12, response to IL4, Wnt signaling
M14.42.split1	T cells	3	8	SLED3.8	CD4 T cell differentiation and activation	T cells, IL12, response to IL4, Wnt signaling
GO:0034116.split2	positive regulation of heterotypic cell-cell adhesion	3	9	SLED3.9	CD4 T cell differentiation and activation	CD56 bright NK cells, T cell differentiation, TCR
GO:0045582.split1	positive regulation of T cell differentiation	3	9	SLED3.9	CD4 T cell differentiation and activation	CD56 bright NK cells, T cell differentiation, TCR
GO:1904355.split1	positive regulation of telomere capping	3	9	SLED3.9	CD4 T cell differentiation and activation	CD56 bright NK cells, T cell differentiation, TCR
GO:0030669.split3	clathrin-coated endocytic vesicle membrane	3	9	SLED3.9	CD4 T cell differentiation and activation	CD56 bright NK cells, T cell differentiation, TCR
GO:0031226.split2	intrinsic component of plasma membrane	3	9	SLED3.9	CD4 T cell differentiation and activation	CD56 bright NK cells, T cell differentiation, TCR
R-HSA-164952.split2	The role of Nef in HIV-1 replication and disease pathogenesis	3	9	SLED3.9	CD4 T cell differentiation and activation	CD56 bright NK cells, T cell differentiation, TCR
R-HSA-202424.split2	Downstream TCR signaling	3	9	SLED3.9	CD4 T cell differentiation and activation	CD56 bright NK cells, T cell differentiation, TCR
R-HSA-202427.split1	Phosphorylation of CD3 and TCR zeta chains	3	9	SLED3.9	CD4 T cell differentiation and activation	CD56 bright NK cells, T cell differentiation, TCR
hsa04640.split5	Hematopoietic cell lineage	3	9	SLED3.9	CD4 T cell differentiation and activation	CD56 bright NK cells, T cell differentiation, TCR
NK_cells_CD56bright	NK_cells_CD56bright	3	9	SLED3.9	CD4 T cell differentiation and activation	CD56 bright NK cells, T cell differentiation, TCR
LI.M4.0.split2	cell cycle and transcription	4	1	SLED4.1	Neutrophils, monotyes, activated DCs, phagocytosis	Neutrophils, monocytes, phagocytosis, IL10, IL12, BDNF-TrkB, VEFG
LI.M11.0.split2	enriched in monocytes (II)	4	1	SLED4.1	Neutrophils, monotyes, activated DCs, phagocytosis	Neutrophils, monocytes, phagocytosis, IL10, IL12, BDNF-TrkB, VEFG
LI.M40.split1	complement and other receptors in DCs	4	1	SLED4.1	Neutrophils, monotyes, activated DCs, phagocytosis	Neutrophils, monocytes, phagocytosis, IL10, IL12, BDNF-TrkB, VEFG
LI.M49.split2	transcription regulation in cell development	4	1	SLED4.1	Neutrophils, monotyes, activated DCs, phagocytosis	Neutrophils, monocytes, phagocytosis, IL10, IL12, BDNF-TrkB, VEFG
DC.M6.13.split2	Cell Death	4	1	SLED4.1	Neutrophils, monotyes, activated DCs, phagocytosis	Neutrophils, monocytes, phagocytosis, IL10, IL12, BDNF-TrkB, VEFG
GO:0006493.split4	protein O-linked glycosylation	4	1	SLED4.1	Neutrophils, monotyes, activated DCs, phagocytosis	Neutrophils, monocytes, phagocytosis, IL10, IL12, BDNF-TrkB, VEFG
GO:0006801.split2	superoxide metabolic process	4	1	SLED4.1	Neutrophils, monotyes, activated DCs, phagocytosis	Neutrophils, monocytes, phagocytosis, IL10, IL12, BDNF-TrkB, VEFG
GO:0006953.split1	acute-phase response	4	1	SLED4.1	Neutrophils, monotyes, activated DCs, phagocytosis	Neutrophils, monocytes, phagocytosis, IL10, IL12, BDNF-TrkB, VEFG
GO:0022617.split1	extracellular matrix disassembly	4	1	SLED4.1	Neutrophils, monotyes, activated DCs, phagocytosis	Neutrophils, monocytes, phagocytosis, IL10, IL12, BDNF-TrkB, VEFG
GO:0030593.split5	neutrophil chemotaxis	4	1	SLED4.1	Neutrophils, monotyes, activated DCs, phagocytosis	Neutrophils, monocytes, phagocytosis, IL10, IL12, BDNF-TrkB, VEFG
GO:0030878.split1	thyroid gland development	4	1	SLED4.1	Neutrophils, monotyes, activated DCs, phagocytosis	Neutrophils, monocytes, phagocytosis, IL10, IL12, BDNF-TrkB, VEFG
GO:0032270.split1	positive regulation of cellular protein metabolic process	4	1	SLED4.1	Neutrophils, monotyes, activated DCs, phagocytosis	Neutrophils, monocytes, phagocytosis, IL10, IL12, BDNF-TrkB, VEFG
GO:0032735.split6	positive regulation of interleukin-12 production	4	1	SLED4.1	Neutrophils, monotyes, activated DCs, phagocytosis	Neutrophils, monocytes, phagocytosis, IL10, IL12, BDNF-TrkB, VEFG
GO:0034097.split1	response to cytokine	4	1	SLED4.1	Neutrophils, monotyes, activated DCs, phagocytosis	Neutrophils, monocytes, phagocytosis, IL10, IL12, BDNF-TrkB, VEFG
GO:0045747.split4	positive regulation of Notch signaling pathway	4	1	SLED4.1	Neutrophils, monotyes, activated DCs, phagocytosis	Neutrophils, monocytes, phagocytosis, IL10, IL12, BDNF-TrkB, VEFG
GO:0048041.split4	focal adhesion assembly	4	1	SLED4.1	Neutrophils, monotyes, activated DCs, phagocytosis	Neutrophils, monocytes, phagocytosis, IL10, IL12, BDNF-TrkB, VEFG
GO:0048678.split3	response to axon injury	4	1	SLED4.1	Neutrophils, monotyes, activated DCs, phagocytosis	Neutrophils, monocytes, phagocytosis, IL10, IL12, BDNF-TrkB, VEFG
GO:0050728.split4	negative regulation of inflammatory response	4	1	SLED4.1	Neutrophils, monotyes, activated DCs, phagocytosis	Neutrophils, monocytes, phagocytosis, IL10, IL12, BDNF-TrkB, VEFG
GO:0072672	neutrophil extravasation	4	1	SLED4.1	Neutrophils, monotyes, activated DCs, phagocytosis	Neutrophils, monocytes, phagocytosis, IL10, IL12, BDNF-TrkB, VEFG
GO:0005901.split6	caveola	4	1	SLED4.1	Neutrophils, monotyes, activated DCs, phagocytosis	Neutrophils, monocytes, phagocytosis, IL10, IL12, BDNF-TrkB, VEFG
GO:0030864.split3	cortical actin cytoskeleton	4	1	SLED4.1	Neutrophils, monotyes, activated DCs, phagocytosis	Neutrophils, monocytes, phagocytosis, IL10, IL12, BDNF-TrkB, VEFG
GO:0031982.split10	vesicle	4	1	SLED4.1	Neutrophils, monotyes, activated DCs, phagocytosis	Neutrophils, monocytes, phagocytosis, IL10, IL12, BDNF-TrkB, VEFG
GO:0032010	phagolysosome	4	1	SLED4.1	Neutrophils, monotyes, activated DCs, phagocytosis	Neutrophils, monocytes, phagocytosis, IL10, IL12, BDNF-TrkB, VEFG
GO:0034451.split7	centriolar satellite	4	1	SLED4.1	Neutrophils, monotyes, activated DCs, phagocytosis	Neutrophils, monocytes, phagocytosis, IL10, IL12, BDNF-TrkB, VEFG
GO:0034774.split3	secretory granule lumen	4	1	SLED4.1	Neutrophils, monotyes, activated DCs, phagocytosis	Neutrophils, monocytes, phagocytosis, IL10, IL12, BDNF-TrkB, VEFG
GO:1904724.split3	tertiary granule lumen	4	1	SLED4.1	Neutrophils, monotyes, activated DCs, phagocytosis	Neutrophils, monocytes, phagocytosis, IL10, IL12, BDNF-TrkB, VEFG
GO:0000987.split4	cis-regulatory region sequence-specific DNA binding	4	1	SLED4.1	Neutrophils, monotyes, activated DCs, phagocytosis	Neutrophils, monocytes, phagocytosis, IL10, IL12, BDNF-TrkB, VEFG
GO:0005161.split2	platelet-derived growth factor receptor binding	4	1	SLED4.1	Neutrophils, monotyes, activated DCs, phagocytosis	Neutrophils, monocytes, phagocytosis, IL10, IL12, BDNF-TrkB, VEFG
GO:0032396.split1	inhibitory MHC class I receptor activity	4	1	SLED4.1	Neutrophils, monotyes, activated DCs, phagocytosis	Neutrophils, monocytes, phagocytosis, IL10, IL12, BDNF-TrkB, VEFG
R-HSA-1222556.split2	ROS and RNS production in phagocytes	4	1	SLED4.1	Neutrophils, monotyes, activated DCs, phagocytosis	Neutrophils, monocytes, phagocytosis, IL10, IL12, BDNF-TrkB, VEFG
R-HSA-1280215.split7	Cytokine Signaling in Immune system	4	1	SLED4.1	Neutrophils, monotyes, activated DCs, phagocytosis	Neutrophils, monocytes, phagocytosis, IL10, IL12, BDNF-TrkB, VEFG
R-HSA-1368108.split1	BMAL1:CLOCK,NPAS2 activates circadian gene expression	4	1	SLED4.1	Neutrophils, monotyes, activated DCs, phagocytosis	Neutrophils, monocytes, phagocytosis, IL10, IL12, BDNF-TrkB, VEFG
R-HSA-1474228.split6	Degradation of the extracellular matrix	4	1	SLED4.1	Neutrophils, monotyes, activated DCs, phagocytosis	Neutrophils, monocytes, phagocytosis, IL10, IL12, BDNF-TrkB, VEFG
R-HSA-167044.split2	Signalling to RAS	4	1	SLED4.1	Neutrophils, monotyes, activated DCs, phagocytosis	Neutrophils, monocytes, phagocytosis, IL10, IL12, BDNF-TrkB, VEFG
R-HSA-194138.split6	Signaling by VEGF	4	1	SLED4.1	Neutrophils, monotyes, activated DCs, phagocytosis	Neutrophils, monocytes, phagocytosis, IL10, IL12, BDNF-TrkB, VEFG
R-HSA-198933.split8	Immunoregulatory interactions between a Lymphoid and a non-Lymphoid cell	4	1	SLED4.1	Neutrophils, monotyes, activated DCs, phagocytosis	Neutrophils, monocytes, phagocytosis, IL10, IL12, BDNF-TrkB, VEFG
R-HSA-2559582.split4	Senescence-Associated Secretory Phenotype (SASP)	4	1	SLED4.1	Neutrophils, monotyes, activated DCs, phagocytosis	Neutrophils, monocytes, phagocytosis, IL10, IL12, BDNF-TrkB, VEFG
R-HSA-3299685.split3	Detoxification of Reactive Oxygen Species	4	1	SLED4.1	Neutrophils, monotyes, activated DCs, phagocytosis	Neutrophils, monocytes, phagocytosis, IL10, IL12, BDNF-TrkB, VEFG
R-HSA-373755.split5	Semaphorin interactions	4	1	SLED4.1	Neutrophils, monotyes, activated DCs, phagocytosis	Neutrophils, monocytes, phagocytosis, IL10, IL12, BDNF-TrkB, VEFG
R-HSA-5663084.split1	Diseases of carbohydrate metabolism	4	1	SLED4.1	Neutrophils, monotyes, activated DCs, phagocytosis	Neutrophils, monocytes, phagocytosis, IL10, IL12, BDNF-TrkB, VEFG
R-HSA-6783783.split2	Interleukin-10 signaling	4	1	SLED4.1	Neutrophils, monotyes, activated DCs, phagocytosis	Neutrophils, monocytes, phagocytosis, IL10, IL12, BDNF-TrkB, VEFG
R-HSA-8982491.split1	Glycogen metabolism	4	1	SLED4.1	Neutrophils, monotyes, activated DCs, phagocytosis	Neutrophils, monocytes, phagocytosis, IL10, IL12, BDNF-TrkB, VEFG
R-HSA-9013026.split6	RHOB GTPase cycle	4	1	SLED4.1	Neutrophils, monotyes, activated DCs, phagocytosis	Neutrophils, monocytes, phagocytosis, IL10, IL12, BDNF-TrkB, VEFG
R-HSA-9013404.split6	RAC2 GTPase cycle	4	1	SLED4.1	Neutrophils, monotyes, activated DCs, phagocytosis	Neutrophils, monocytes, phagocytosis, IL10, IL12, BDNF-TrkB, VEFG
R-HSA-9013423.split7	RAC3 GTPase cycle	4	1	SLED4.1	Neutrophils, monotyes, activated DCs, phagocytosis	Neutrophils, monocytes, phagocytosis, IL10, IL12, BDNF-TrkB, VEFG
R-HSA-9674555.split1	Signaling by CSF3 (G-CSF)	4	1	SLED4.1	Neutrophils, monotyes, activated DCs, phagocytosis	Neutrophils, monocytes, phagocytosis, IL10, IL12, BDNF-TrkB, VEFG
hsa00030.split1	Pentose phosphate pathway	4	1	SLED4.1	Neutrophils, monotyes, activated DCs, phagocytosis	Neutrophils, monocytes, phagocytosis, IL10, IL12, BDNF-TrkB, VEFG
hsa00500.split2	Starch and sucrose metabolism	4	1	SLED4.1	Neutrophils, monotyes, activated DCs, phagocytosis	Neutrophils, monocytes, phagocytosis, IL10, IL12, BDNF-TrkB, VEFG
hsa00592.split2	alpha-Linolenic acid metabolism	4	1	SLED4.1	Neutrophils, monotyes, activated DCs, phagocytosis	Neutrophils, monocytes, phagocytosis, IL10, IL12, BDNF-TrkB, VEFG
hsa04061.split6	Viral protein interaction with cytokine and cytokine receptor	4	1	SLED4.1	Neutrophils, monotyes, activated DCs, phagocytosis	Neutrophils, monocytes, phagocytosis, IL10, IL12, BDNF-TrkB, VEFG
hsa04380.split3	Osteoclast differentiation	4	1	SLED4.1	Neutrophils, monotyes, activated DCs, phagocytosis	Neutrophils, monocytes, phagocytosis, IL10, IL12, BDNF-TrkB, VEFG
hsa04666.split1	Fc gamma R-mediated phagocytosis	4	1	SLED4.1	Neutrophils, monotyes, activated DCs, phagocytosis	Neutrophils, monocytes, phagocytosis, IL10, IL12, BDNF-TrkB, VEFG
hsa04670.split3	Leukocyte transendothelial migration	4	1	SLED4.1	Neutrophils, monotyes, activated DCs, phagocytosis	Neutrophils, monocytes, phagocytosis, IL10, IL12, BDNF-TrkB, VEFG
hsa04915.split2	Estrogen signaling pathway	4	1	SLED4.1	Neutrophils, monotyes, activated DCs, phagocytosis	Neutrophils, monocytes, phagocytosis, IL10, IL12, BDNF-TrkB, VEFG
hsa04930.split3	Type II diabetes mellitus	4	1	SLED4.1	Neutrophils, monotyes, activated DCs, phagocytosis	Neutrophils, monocytes, phagocytosis, IL10, IL12, BDNF-TrkB, VEFG
hsa05120.split1	Epithelial cell signaling in Helicobacter pylori infection	4	1	SLED4.1	Neutrophils, monotyes, activated DCs, phagocytosis	Neutrophils, monocytes, phagocytosis, IL10, IL12, BDNF-TrkB, VEFG
hsa05166.split3	Human T-cell leukemia virus 1 infection	4	1	SLED4.1	Neutrophils, monotyes, activated DCs, phagocytosis	Neutrophils, monocytes, phagocytosis, IL10, IL12, BDNF-TrkB, VEFG
hsa05208.split2	Chemical carcinogenesis - reactive oxygen species	4	1	SLED4.1	Neutrophils, monotyes, activated DCs, phagocytosis	Neutrophils, monocytes, phagocytosis, IL10, IL12, BDNF-TrkB, VEFG
hsa05212.split3	Pancreatic cancer	4	1	SLED4.1	Neutrophils, monotyes, activated DCs, phagocytosis	Neutrophils, monocytes, phagocytosis, IL10, IL12, BDNF-TrkB, VEFG
hsa05221.split3	Acute myeloid leukemia	4	1	SLED4.1	Neutrophils, monotyes, activated DCs, phagocytosis	Neutrophils, monocytes, phagocytosis, IL10, IL12, BDNF-TrkB, VEFG
hsa05226.split3	Gastric cancer	4	1	SLED4.1	Neutrophils, monotyes, activated DCs, phagocytosis	Neutrophils, monocytes, phagocytosis, IL10, IL12, BDNF-TrkB, VEFG
WP167.split1	Eicosanoid synthesis	4	1	SLED4.1	Neutrophils, monotyes, activated DCs, phagocytosis	Neutrophils, monocytes, phagocytosis, IL10, IL12, BDNF-TrkB, VEFG
WP1772.split3	Apoptosis modulation and signaling	4	1	SLED4.1	Neutrophils, monotyes, activated DCs, phagocytosis	Neutrophils, monocytes, phagocytosis, IL10, IL12, BDNF-TrkB, VEFG
WP2037.split5	Prolactin signaling pathway	4	1	SLED4.1	Neutrophils, monotyes, activated DCs, phagocytosis	Neutrophils, monocytes, phagocytosis, IL10, IL12, BDNF-TrkB, VEFG
WP2526.split4	PDGF pathway	4	1	SLED4.1	Neutrophils, monotyes, activated DCs, phagocytosis	Neutrophils, monocytes, phagocytosis, IL10, IL12, BDNF-TrkB, VEFG
WP262.split2	Ebstein-Barr virus LMP1 signaling	4	1	SLED4.1	Neutrophils, monotyes, activated DCs, phagocytosis	Neutrophils, monocytes, phagocytosis, IL10, IL12, BDNF-TrkB, VEFG
WP3676.split3	BDNF-TrkB signaling	4	1	SLED4.1	Neutrophils, monotyes, activated DCs, phagocytosis	Neutrophils, monocytes, phagocytosis, IL10, IL12, BDNF-TrkB, VEFG
WP3929.split2	Chemokine signaling pathway	4	1	SLED4.1	Neutrophils, monotyes, activated DCs, phagocytosis	Neutrophils, monocytes, phagocytosis, IL10, IL12, BDNF-TrkB, VEFG
WP4239.split2	Epithelial to mesenchymal transition in colorectal cancer	4	1	SLED4.1	Neutrophils, monotyes, activated DCs, phagocytosis	Neutrophils, monocytes, phagocytosis, IL10, IL12, BDNF-TrkB, VEFG
WP4263.split3	Pancreatic adenocarcinoma pathway	4	1	SLED4.1	Neutrophils, monotyes, activated DCs, phagocytosis	Neutrophils, monocytes, phagocytosis, IL10, IL12, BDNF-TrkB, VEFG
WP4879.split3	Overlap between signal transduction pathways contributing to LMNA laminopathies	4	1	SLED4.1	Neutrophils, monotyes, activated DCs, phagocytosis	Neutrophils, monocytes, phagocytosis, IL10, IL12, BDNF-TrkB, VEFG
M14.28.split1	Neutrophils	4	1	SLED4.1	Neutrophils, monotyes, activated DCs, phagocytosis	Neutrophils, monocytes, phagocytosis, IL10, IL12, BDNF-TrkB, VEFG
M15.26.split2	Neutrophils	4	1	SLED4.1	Neutrophils, monotyes, activated DCs, phagocytosis	Neutrophils, monocytes, phagocytosis, IL10, IL12, BDNF-TrkB, VEFG
M16.40.split1	Monocytes	4	1	SLED4.1	Neutrophils, monotyes, activated DCs, phagocytosis	Neutrophils, monocytes, phagocytosis, IL10, IL12, BDNF-TrkB, VEFG
LI.M16.split2	TLR and inflammatory signaling	4	2	SLED4.2	Neutrophils, monotyes, activated DCs, phagocytosis	Neutrophils, monotypes, activated DCs, inflammation, GPCR activity, TLR, regulation of IKK/NFkB and ERK1/ERK2 signaling
LI.M37.0.split3	immune activation - generic cluster	4	2	SLED4.2	Neutrophils, monotyes, activated DCs, phagocytosis	Neutrophils, monotypes, activated DCs, inflammation, GPCR activity, TLR, regulation of IKK/NFkB and ERK1/ERK2 signaling
LI.M37.1	enriched in neutrophils (I)	4	2	SLED4.2	Neutrophils, monotyes, activated DCs, phagocytosis	Neutrophils, monotypes, activated DCs, inflammation, GPCR activity, TLR, regulation of IKK/NFkB and ERK1/ERK2 signaling
LI.M55.split3	TBA	4	2	SLED4.2	Neutrophils, monotyes, activated DCs, phagocytosis	Neutrophils, monotypes, activated DCs, inflammation, GPCR activity, TLR, regulation of IKK/NFkB and ERK1/ERK2 signaling
LI.M56.split1	suppression of MAPK signaling	4	2	SLED4.2	Neutrophils, monotyes, activated DCs, phagocytosis	Neutrophils, monotypes, activated DCs, inflammation, GPCR activity, TLR, regulation of IKK/NFkB and ERK1/ERK2 signaling
LI.M114.0.split2	TBA	4	2	SLED4.2	Neutrophils, monotyes, activated DCs, phagocytosis	Neutrophils, monotypes, activated DCs, inflammation, GPCR activity, TLR, regulation of IKK/NFkB and ERK1/ERK2 signaling
LI.M118.0.split1	enriched in monocytes (IV)	4	2	SLED4.2	Neutrophils, monotyes, activated DCs, phagocytosis	Neutrophils, monotypes, activated DCs, inflammation, GPCR activity, TLR, regulation of IKK/NFkB and ERK1/ERK2 signaling
LI.M163.split1	enriched in neutrophils (II)	4	2	SLED4.2	Neutrophils, monotyes, activated DCs, phagocytosis	Neutrophils, monotypes, activated DCs, inflammation, GPCR activity, TLR, regulation of IKK/NFkB and ERK1/ERK2 signaling
LI.M198.split1	TBA	4	2	SLED4.2	Neutrophils, monotyes, activated DCs, phagocytosis	Neutrophils, monotypes, activated DCs, inflammation, GPCR activity, TLR, regulation of IKK/NFkB and ERK1/ERK2 signaling
LI.M198.split2	TBA	4	2	SLED4.2	Neutrophils, monotyes, activated DCs, phagocytosis	Neutrophils, monotypes, activated DCs, inflammation, GPCR activity, TLR, regulation of IKK/NFkB and ERK1/ERK2 signaling
LI.S4.split2	Monocyte surface signature	4	2	SLED4.2	Neutrophils, monotyes, activated DCs, phagocytosis	Neutrophils, monotypes, activated DCs, inflammation, GPCR activity, TLR, regulation of IKK/NFkB and ERK1/ERK2 signaling
LI.S11.split1	Activated (LPS) dendritic cell surface signature	4	2	SLED4.2	Neutrophils, monotyes, activated DCs, phagocytosis	Neutrophils, monotypes, activated DCs, inflammation, GPCR activity, TLR, regulation of IKK/NFkB and ERK1/ERK2 signaling
DC.M4.13.split1	Inflammation	4	2	SLED4.2	Neutrophils, monotyes, activated DCs, phagocytosis	Neutrophils, monotypes, activated DCs, inflammation, GPCR activity, TLR, regulation of IKK/NFkB and ERK1/ERK2 signaling
DC.M5.14.split2	Undetermined	4	2	SLED4.2	Neutrophils, monotyes, activated DCs, phagocytosis	Neutrophils, monotypes, activated DCs, inflammation, GPCR activity, TLR, regulation of IKK/NFkB and ERK1/ERK2 signaling
DC.M7.27.split1	Undetermined	4	2	SLED4.2	Neutrophils, monotyes, activated DCs, phagocytosis	Neutrophils, monotypes, activated DCs, inflammation, GPCR activity, TLR, regulation of IKK/NFkB and ERK1/ERK2 signaling
GO:0001501.split10	skeletal system development	4	2	SLED4.2	Neutrophils, monotyes, activated DCs, phagocytosis	Neutrophils, monotypes, activated DCs, inflammation, GPCR activity, TLR, regulation of IKK/NFkB and ERK1/ERK2 signaling
GO:0001819.split3	positive regulation of cytokine production	4	2	SLED4.2	Neutrophils, monotyes, activated DCs, phagocytosis	Neutrophils, monotypes, activated DCs, inflammation, GPCR activity, TLR, regulation of IKK/NFkB and ERK1/ERK2 signaling
GO:0001890.split3	placenta development	4	2	SLED4.2	Neutrophils, monotyes, activated DCs, phagocytosis	Neutrophils, monotypes, activated DCs, inflammation, GPCR activity, TLR, regulation of IKK/NFkB and ERK1/ERK2 signaling
GO:0006644.split3	phospholipid metabolic process	4	2	SLED4.2	Neutrophils, monotyes, activated DCs, phagocytosis	Neutrophils, monotypes, activated DCs, inflammation, GPCR activity, TLR, regulation of IKK/NFkB and ERK1/ERK2 signaling
GO:0006691.split2	leukotriene metabolic process	4	2	SLED4.2	Neutrophils, monotyes, activated DCs, phagocytosis	Neutrophils, monotypes, activated DCs, inflammation, GPCR activity, TLR, regulation of IKK/NFkB and ERK1/ERK2 signaling
GO:0006865.split6	amino acid transport	4	2	SLED4.2	Neutrophils, monotyes, activated DCs, phagocytosis	Neutrophils, monotypes, activated DCs, inflammation, GPCR activity, TLR, regulation of IKK/NFkB and ERK1/ERK2 signaling
GO:0006935.split2	chemotaxis	4	2	SLED4.2	Neutrophils, monotyes, activated DCs, phagocytosis	Neutrophils, monotypes, activated DCs, inflammation, GPCR activity, TLR, regulation of IKK/NFkB and ERK1/ERK2 signaling
GO:0006954.split4	inflammatory response	4	2	SLED4.2	Neutrophils, monotyes, activated DCs, phagocytosis	Neutrophils, monotypes, activated DCs, inflammation, GPCR activity, TLR, regulation of IKK/NFkB and ERK1/ERK2 signaling
GO:0007166.split4	cell surface receptor signaling pathway	4	2	SLED4.2	Neutrophils, monotyes, activated DCs, phagocytosis	Neutrophils, monotypes, activated DCs, inflammation, GPCR activity, TLR, regulation of IKK/NFkB and ERK1/ERK2 signaling
GO:0007169.split6	transmembrane receptor protein tyrosine kinase signaling pathway	4	2	SLED4.2	Neutrophils, monotyes, activated DCs, phagocytosis	Neutrophils, monotypes, activated DCs, inflammation, GPCR activity, TLR, regulation of IKK/NFkB and ERK1/ERK2 signaling
GO:0007566.split2	embryo implantation	4	2	SLED4.2	Neutrophils, monotyes, activated DCs, phagocytosis	Neutrophils, monotypes, activated DCs, inflammation, GPCR activity, TLR, regulation of IKK/NFkB and ERK1/ERK2 signaling
GO:0007585.split3	respiratory gaseous exchange by respiratory system	4	2	SLED4.2	Neutrophils, monotyes, activated DCs, phagocytosis	Neutrophils, monotypes, activated DCs, inflammation, GPCR activity, TLR, regulation of IKK/NFkB and ERK1/ERK2 signaling
GO:0010867.split3	positive regulation of triglyceride biosynthetic process	4	2	SLED4.2	Neutrophils, monotyes, activated DCs, phagocytosis	Neutrophils, monotypes, activated DCs, inflammation, GPCR activity, TLR, regulation of IKK/NFkB and ERK1/ERK2 signaling
GO:0019233.split5	sensory perception of pain	4	2	SLED4.2	Neutrophils, monotyes, activated DCs, phagocytosis	Neutrophils, monotypes, activated DCs, inflammation, GPCR activity, TLR, regulation of IKK/NFkB and ERK1/ERK2 signaling
GO:0019369.split5	arachidonic acid metabolic process	4	2	SLED4.2	Neutrophils, monotyes, activated DCs, phagocytosis	Neutrophils, monotypes, activated DCs, inflammation, GPCR activity, TLR, regulation of IKK/NFkB and ERK1/ERK2 signaling
GO:0022900.split6	electron transport chain	4	2	SLED4.2	Neutrophils, monotyes, activated DCs, phagocytosis	Neutrophils, monotypes, activated DCs, inflammation, GPCR activity, TLR, regulation of IKK/NFkB and ERK1/ERK2 signaling
GO:0035331.split2	negative regulation of hippo signaling	4	2	SLED4.2	Neutrophils, monotyes, activated DCs, phagocytosis	Neutrophils, monotypes, activated DCs, inflammation, GPCR activity, TLR, regulation of IKK/NFkB and ERK1/ERK2 signaling
GO:0036151.split3	phosphatidylcholine acyl-chain remodeling	4	2	SLED4.2	Neutrophils, monotyes, activated DCs, phagocytosis	Neutrophils, monotypes, activated DCs, inflammation, GPCR activity, TLR, regulation of IKK/NFkB and ERK1/ERK2 signaling
GO:0038083.split2	peptidyl-tyrosine autophosphorylation	4	2	SLED4.2	Neutrophils, monotyes, activated DCs, phagocytosis	Neutrophils, monotypes, activated DCs, inflammation, GPCR activity, TLR, regulation of IKK/NFkB and ERK1/ERK2 signaling
GO:0042060.split8	wound healing	4	2	SLED4.2	Neutrophils, monotyes, activated DCs, phagocytosis	Neutrophils, monotypes, activated DCs, inflammation, GPCR activity, TLR, regulation of IKK/NFkB and ERK1/ERK2 signaling
GO:0043122.split2	regulation of I-kappaB kinase/NF-kappaB signaling	4	2	SLED4.2	Neutrophils, monotyes, activated DCs, phagocytosis	Neutrophils, monotypes, activated DCs, inflammation, GPCR activity, TLR, regulation of IKK/NFkB and ERK1/ERK2 signaling
GO:0045429.split4	positive regulation of nitric oxide biosynthetic process	4	2	SLED4.2	Neutrophils, monotyes, activated DCs, phagocytosis	Neutrophils, monotypes, activated DCs, inflammation, GPCR activity, TLR, regulation of IKK/NFkB and ERK1/ERK2 signaling
GO:0048843.split3	negative regulation of axon extension involved in axon guidance	4	2	SLED4.2	Neutrophils, monotyes, activated DCs, phagocytosis	Neutrophils, monotypes, activated DCs, inflammation, GPCR activity, TLR, regulation of IKK/NFkB and ERK1/ERK2 signaling
GO:0050776.split2	regulation of immune response	4	2	SLED4.2	Neutrophils, monotyes, activated DCs, phagocytosis	Neutrophils, monotypes, activated DCs, inflammation, GPCR activity, TLR, regulation of IKK/NFkB and ERK1/ERK2 signaling
GO:0070373.split1	negative regulation of ERK1 and ERK2 cascade	4	2	SLED4.2	Neutrophils, monotyes, activated DCs, phagocytosis	Neutrophils, monotypes, activated DCs, inflammation, GPCR activity, TLR, regulation of IKK/NFkB and ERK1/ERK2 signaling
GO:0098655.split2	cation transmembrane transport	4	2	SLED4.2	Neutrophils, monotyes, activated DCs, phagocytosis	Neutrophils, monotypes, activated DCs, inflammation, GPCR activity, TLR, regulation of IKK/NFkB and ERK1/ERK2 signaling
GO:1900016.split1	negative regulation of cytokine production involved in inflammatory response	4	2	SLED4.2	Neutrophils, monotyes, activated DCs, phagocytosis	Neutrophils, monotypes, activated DCs, inflammation, GPCR activity, TLR, regulation of IKK/NFkB and ERK1/ERK2 signaling
GO:2000463.split3	positive regulation of excitatory postsynaptic potential	4	2	SLED4.2	Neutrophils, monotyes, activated DCs, phagocytosis	Neutrophils, monotypes, activated DCs, inflammation, GPCR activity, TLR, regulation of IKK/NFkB and ERK1/ERK2 signaling
GO:0016323.split1	basolateral plasma membrane	4	2	SLED4.2	Neutrophils, monotyes, activated DCs, phagocytosis	Neutrophils, monotypes, activated DCs, inflammation, GPCR activity, TLR, regulation of IKK/NFkB and ERK1/ERK2 signaling
GO:0016324.split3	apical plasma membrane	4	2	SLED4.2	Neutrophils, monotyes, activated DCs, phagocytosis	Neutrophils, monotypes, activated DCs, inflammation, GPCR activity, TLR, regulation of IKK/NFkB and ERK1/ERK2 signaling
GO:0030139.split3	endocytic vesicle	4	2	SLED4.2	Neutrophils, monotyes, activated DCs, phagocytosis	Neutrophils, monotypes, activated DCs, inflammation, GPCR activity, TLR, regulation of IKK/NFkB and ERK1/ERK2 signaling
GO:0031012.split5	extracellular matrix	4	2	SLED4.2	Neutrophils, monotyes, activated DCs, phagocytosis	Neutrophils, monotypes, activated DCs, inflammation, GPCR activity, TLR, regulation of IKK/NFkB and ERK1/ERK2 signaling
GO:0043235.split10	receptor complex	4	2	SLED4.2	Neutrophils, monotyes, activated DCs, phagocytosis	Neutrophils, monotypes, activated DCs, inflammation, GPCR activity, TLR, regulation of IKK/NFkB and ERK1/ERK2 signaling
GO:0101003.split1	ficolin-1-rich granule membrane	4	2	SLED4.2	Neutrophils, monotyes, activated DCs, phagocytosis	Neutrophils, monotypes, activated DCs, inflammation, GPCR activity, TLR, regulation of IKK/NFkB and ERK1/ERK2 signaling
GO:0004222.split1	metalloendopeptidase activity	4	2	SLED4.2	Neutrophils, monotyes, activated DCs, phagocytosis	Neutrophils, monotypes, activated DCs, inflammation, GPCR activity, TLR, regulation of IKK/NFkB and ERK1/ERK2 signaling
GO:0004930.split6	G protein-coupled receptor activity	4	2	SLED4.2	Neutrophils, monotyes, activated DCs, phagocytosis	Neutrophils, monotypes, activated DCs, inflammation, GPCR activity, TLR, regulation of IKK/NFkB and ERK1/ERK2 signaling
GO:0015293.split2	symporter activity	4	2	SLED4.2	Neutrophils, monotyes, activated DCs, phagocytosis	Neutrophils, monotypes, activated DCs, inflammation, GPCR activity, TLR, regulation of IKK/NFkB and ERK1/ERK2 signaling
R-HSA-112310.split3	Neurotransmitter release cycle	4	2	SLED4.2	Neutrophils, monotyes, activated DCs, phagocytosis	Neutrophils, monotypes, activated DCs, inflammation, GPCR activity, TLR, regulation of IKK/NFkB and ERK1/ERK2 signaling
R-HSA-163125.split7	Post-translational modification: synthesis of GPI-anchored proteins	4	2	SLED4.2	Neutrophils, monotyes, activated DCs, phagocytosis	Neutrophils, monotypes, activated DCs, inflammation, GPCR activity, TLR, regulation of IKK/NFkB and ERK1/ERK2 signaling
R-HSA-425366.split2	Transport of bile salts and organic acids, metal ions and amine compounds	4	2	SLED4.2	Neutrophils, monotyes, activated DCs, phagocytosis	Neutrophils, monotypes, activated DCs, inflammation, GPCR activity, TLR, regulation of IKK/NFkB and ERK1/ERK2 signaling
R-HSA-449836.split2	Other interleukin signaling	4	2	SLED4.2	Neutrophils, monotyes, activated DCs, phagocytosis	Neutrophils, monotypes, activated DCs, inflammation, GPCR activity, TLR, regulation of IKK/NFkB and ERK1/ERK2 signaling
R-HSA-5173105.split6	O-linked glycosylation	4	2	SLED4.2	Neutrophils, monotyes, activated DCs, phagocytosis	Neutrophils, monotypes, activated DCs, inflammation, GPCR activity, TLR, regulation of IKK/NFkB and ERK1/ERK2 signaling
R-HSA-6794361.split1	Neurexins and neuroligins	4	2	SLED4.2	Neutrophils, monotyes, activated DCs, phagocytosis	Neutrophils, monotypes, activated DCs, inflammation, GPCR activity, TLR, regulation of IKK/NFkB and ERK1/ERK2 signaling
R-HSA-8978868.split6	Fatty acid metabolism	4	2	SLED4.2	Neutrophils, monotyes, activated DCs, phagocytosis	Neutrophils, monotypes, activated DCs, inflammation, GPCR activity, TLR, regulation of IKK/NFkB and ERK1/ERK2 signaling
hsa00564.split3	Glycerophospholipid metabolism	4	2	SLED4.2	Neutrophils, monotyes, activated DCs, phagocytosis	Neutrophils, monotypes, activated DCs, inflammation, GPCR activity, TLR, regulation of IKK/NFkB and ERK1/ERK2 signaling
hsa00590.split4	Arachidonic acid metabolism	4	2	SLED4.2	Neutrophils, monotyes, activated DCs, phagocytosis	Neutrophils, monotypes, activated DCs, inflammation, GPCR activity, TLR, regulation of IKK/NFkB and ERK1/ERK2 signaling
hsa04060.split6	Cytokine-cytokine receptor interaction	4	2	SLED4.2	Neutrophils, monotyes, activated DCs, phagocytosis	Neutrophils, monotypes, activated DCs, inflammation, GPCR activity, TLR, regulation of IKK/NFkB and ERK1/ERK2 signaling
WP117.split1	GPCRs, other	4	2	SLED4.2	Neutrophils, monotyes, activated DCs, phagocytosis	Neutrophils, monotypes, activated DCs, inflammation, GPCR activity, TLR, regulation of IKK/NFkB and ERK1/ERK2 signaling
WP24.split1	Peptide GPCRs	4	2	SLED4.2	Neutrophils, monotyes, activated DCs, phagocytosis	Neutrophils, monotypes, activated DCs, inflammation, GPCR activity, TLR, regulation of IKK/NFkB and ERK1/ERK2 signaling
WP2509.split4	Nanoparticle triggered autophagic cell death	4	2	SLED4.2	Neutrophils, monotyes, activated DCs, phagocytosis	Neutrophils, monotypes, activated DCs, inflammation, GPCR activity, TLR, regulation of IKK/NFkB and ERK1/ERK2 signaling
WP3668.split4	Hypothesized pathways in pathogenesis of cardiovascular disease	4	2	SLED4.2	Neutrophils, monotyes, activated DCs, phagocytosis	Neutrophils, monotypes, activated DCs, inflammation, GPCR activity, TLR, regulation of IKK/NFkB and ERK1/ERK2 signaling
WP3925.split6	Amino acid metabolism	4	2	SLED4.2	Neutrophils, monotyes, activated DCs, phagocytosis	Neutrophils, monotypes, activated DCs, inflammation, GPCR activity, TLR, regulation of IKK/NFkB and ERK1/ERK2 signaling
WP474.split8	Endochondral ossification	4	2	SLED4.2	Neutrophils, monotyes, activated DCs, phagocytosis	Neutrophils, monotypes, activated DCs, inflammation, GPCR activity, TLR, regulation of IKK/NFkB and ERK1/ERK2 signaling
WP4803.split2	Ciliopathies	4	2	SLED4.2	Neutrophils, monotyes, activated DCs, phagocytosis	Neutrophils, monotypes, activated DCs, inflammation, GPCR activity, TLR, regulation of IKK/NFkB and ERK1/ERK2 signaling
M13.22	Neutrophils	4	2	SLED4.2	Neutrophils, monotyes, activated DCs, phagocytosis	Neutrophils, monotypes, activated DCs, inflammation, GPCR activity, TLR, regulation of IKK/NFkB and ERK1/ERK2 signaling
M14.19	Inflammation	4	2	SLED4.2	Neutrophils, monotyes, activated DCs, phagocytosis	Neutrophils, monotypes, activated DCs, inflammation, GPCR activity, TLR, regulation of IKK/NFkB and ERK1/ERK2 signaling
M15.58.split2	Monocytes	4	2	SLED4.2	Neutrophils, monotyes, activated DCs, phagocytosis	Neutrophils, monotypes, activated DCs, inflammation, GPCR activity, TLR, regulation of IKK/NFkB and ERK1/ERK2 signaling
M15.78	TBD	4	2	SLED4.2	Neutrophils, monotyes, activated DCs, phagocytosis	Neutrophils, monotypes, activated DCs, inflammation, GPCR activity, TLR, regulation of IKK/NFkB and ERK1/ERK2 signaling
M16.102.split1	TBD	4	2	SLED4.2	Neutrophils, monotyes, activated DCs, phagocytosis	Neutrophils, monotypes, activated DCs, inflammation, GPCR activity, TLR, regulation of IKK/NFkB and ERK1/ERK2 signaling
Neutrophils.split1	Neutrophils	4	2	SLED4.2	Neutrophils, monotyes, activated DCs, phagocytosis	Neutrophils, monotypes, activated DCs, inflammation, GPCR activity, TLR, regulation of IKK/NFkB and ERK1/ERK2 signaling
LI.M37.2.split2	endoplasmic reticulum	4	3	SLED4.3	Neutrophils, monotyes, activated DCs, phagocytosis	Macrophage activation, cDC, phagocytosis, Th17 cell differentiation, response to TNF, TLR, JAK-STAT, MAPK
LI.M114.1.split1	glycerophospholipid metabolism	4	3	SLED4.3	Neutrophils, monotyes, activated DCs, phagocytosis	Macrophage activation, cDC, phagocytosis, Th17 cell differentiation, response to TNF, TLR, JAK-STAT, MAPK
DC.M4.13.split2	Inflammation	4	3	SLED4.3	Neutrophils, monotyes, activated DCs, phagocytosis	Macrophage activation, cDC, phagocytosis, Th17 cell differentiation, response to TNF, TLR, JAK-STAT, MAPK
DC.M7.27.split2	Undetermined	4	3	SLED4.3	Neutrophils, monotyes, activated DCs, phagocytosis	Macrophage activation, cDC, phagocytosis, Th17 cell differentiation, response to TNF, TLR, JAK-STAT, MAPK
DC.M8.24.split2	Undetermined	4	3	SLED4.3	Neutrophils, monotyes, activated DCs, phagocytosis	Macrophage activation, cDC, phagocytosis, Th17 cell differentiation, response to TNF, TLR, JAK-STAT, MAPK
DC.M8.37.split1	Undetermined	4	3	SLED4.3	Neutrophils, monotyes, activated DCs, phagocytosis	Macrophage activation, cDC, phagocytosis, Th17 cell differentiation, response to TNF, TLR, JAK-STAT, MAPK
DC.M9.22.split2	Undetermined	4	3	SLED4.3	Neutrophils, monotyes, activated DCs, phagocytosis	Macrophage activation, cDC, phagocytosis, Th17 cell differentiation, response to TNF, TLR, JAK-STAT, MAPK
GO:0005975.split4	carbohydrate metabolic process	4	3	SLED4.3	Neutrophils, monotyes, activated DCs, phagocytosis	Macrophage activation, cDC, phagocytosis, Th17 cell differentiation, response to TNF, TLR, JAK-STAT, MAPK
GO:0006091.split3	generation of precursor metabolites and energy	4	3	SLED4.3	Neutrophils, monotyes, activated DCs, phagocytosis	Macrophage activation, cDC, phagocytosis, Th17 cell differentiation, response to TNF, TLR, JAK-STAT, MAPK
GO:0006631.split3	fatty acid metabolic process	4	3	SLED4.3	Neutrophils, monotyes, activated DCs, phagocytosis	Macrophage activation, cDC, phagocytosis, Th17 cell differentiation, response to TNF, TLR, JAK-STAT, MAPK
GO:0007018.split1	microtubule-based movement	4	3	SLED4.3	Neutrophils, monotyes, activated DCs, phagocytosis	Macrophage activation, cDC, phagocytosis, Th17 cell differentiation, response to TNF, TLR, JAK-STAT, MAPK
GO:0007162.split4	negative regulation of cell adhesion	4	3	SLED4.3	Neutrophils, monotyes, activated DCs, phagocytosis	Macrophage activation, cDC, phagocytosis, Th17 cell differentiation, response to TNF, TLR, JAK-STAT, MAPK
GO:0007173.split1	epidermal growth factor receptor signaling pathway	4	3	SLED4.3	Neutrophils, monotyes, activated DCs, phagocytosis	Macrophage activation, cDC, phagocytosis, Th17 cell differentiation, response to TNF, TLR, JAK-STAT, MAPK
GO:0007190.split2	activation of adenylate cyclase activity	4	3	SLED4.3	Neutrophils, monotyes, activated DCs, phagocytosis	Macrophage activation, cDC, phagocytosis, Th17 cell differentiation, response to TNF, TLR, JAK-STAT, MAPK
GO:0007584.split5	response to nutrient	4	3	SLED4.3	Neutrophils, monotyes, activated DCs, phagocytosis	Macrophage activation, cDC, phagocytosis, Th17 cell differentiation, response to TNF, TLR, JAK-STAT, MAPK
GO:0007611.split7	learning or memory	4	3	SLED4.3	Neutrophils, monotyes, activated DCs, phagocytosis	Macrophage activation, cDC, phagocytosis, Th17 cell differentiation, response to TNF, TLR, JAK-STAT, MAPK
GO:0007612.split6	learning	4	3	SLED4.3	Neutrophils, monotyes, activated DCs, phagocytosis	Macrophage activation, cDC, phagocytosis, Th17 cell differentiation, response to TNF, TLR, JAK-STAT, MAPK
GO:0008654.split3	phospholipid biosynthetic process	4	3	SLED4.3	Neutrophils, monotyes, activated DCs, phagocytosis	Macrophage activation, cDC, phagocytosis, Th17 cell differentiation, response to TNF, TLR, JAK-STAT, MAPK
GO:0010718.split4	positive regulation of epithelial to mesenchymal transition	4	3	SLED4.3	Neutrophils, monotyes, activated DCs, phagocytosis	Macrophage activation, cDC, phagocytosis, Th17 cell differentiation, response to TNF, TLR, JAK-STAT, MAPK
GO:0010941.split1	regulation of cell death	4	3	SLED4.3	Neutrophils, monotyes, activated DCs, phagocytosis	Macrophage activation, cDC, phagocytosis, Th17 cell differentiation, response to TNF, TLR, JAK-STAT, MAPK
GO:0019221.split1	cytokine-mediated signaling pathway	4	3	SLED4.3	Neutrophils, monotyes, activated DCs, phagocytosis	Macrophage activation, cDC, phagocytosis, Th17 cell differentiation, response to TNF, TLR, JAK-STAT, MAPK
GO:0019432.split1	triglyceride biosynthetic process	4	3	SLED4.3	Neutrophils, monotyes, activated DCs, phagocytosis	Macrophage activation, cDC, phagocytosis, Th17 cell differentiation, response to TNF, TLR, JAK-STAT, MAPK
GO:0034612.split4	response to tumor necrosis factor	4	3	SLED4.3	Neutrophils, monotyes, activated DCs, phagocytosis	Macrophage activation, cDC, phagocytosis, Th17 cell differentiation, response to TNF, TLR, JAK-STAT, MAPK
GO:0035019.split4	somatic stem cell population maintenance	4	3	SLED4.3	Neutrophils, monotyes, activated DCs, phagocytosis	Macrophage activation, cDC, phagocytosis, Th17 cell differentiation, response to TNF, TLR, JAK-STAT, MAPK
GO:0035024.split3	negative regulation of Rho protein signal transduction	4	3	SLED4.3	Neutrophils, monotyes, activated DCs, phagocytosis	Macrophage activation, cDC, phagocytosis, Th17 cell differentiation, response to TNF, TLR, JAK-STAT, MAPK
GO:0035176.split5	social behavior	4	3	SLED4.3	Neutrophils, monotyes, activated DCs, phagocytosis	Macrophage activation, cDC, phagocytosis, Th17 cell differentiation, response to TNF, TLR, JAK-STAT, MAPK
GO:0042116.split1	macrophage activation	4	3	SLED4.3	Neutrophils, monotyes, activated DCs, phagocytosis	Macrophage activation, cDC, phagocytosis, Th17 cell differentiation, response to TNF, TLR, JAK-STAT, MAPK
GO:0043032.split3	positive regulation of macrophage activation	4	3	SLED4.3	Neutrophils, monotyes, activated DCs, phagocytosis	Macrophage activation, cDC, phagocytosis, Th17 cell differentiation, response to TNF, TLR, JAK-STAT, MAPK
GO:0045089.split1	positive regulation of innate immune response	4	3	SLED4.3	Neutrophils, monotyes, activated DCs, phagocytosis	Macrophage activation, cDC, phagocytosis, Th17 cell differentiation, response to TNF, TLR, JAK-STAT, MAPK
GO:0048143.split2	astrocyte activation	4	3	SLED4.3	Neutrophils, monotyes, activated DCs, phagocytosis	Macrophage activation, cDC, phagocytosis, Th17 cell differentiation, response to TNF, TLR, JAK-STAT, MAPK
GO:0048854.split3	brain morphogenesis	4	3	SLED4.3	Neutrophils, monotyes, activated DCs, phagocytosis	Macrophage activation, cDC, phagocytosis, Th17 cell differentiation, response to TNF, TLR, JAK-STAT, MAPK
GO:0060100.split1	positive regulation of phagocytosis, engulfment	4	3	SLED4.3	Neutrophils, monotyes, activated DCs, phagocytosis	Macrophage activation, cDC, phagocytosis, Th17 cell differentiation, response to TNF, TLR, JAK-STAT, MAPK
GO:0060291.split4	long-term synaptic potentiation	4	3	SLED4.3	Neutrophils, monotyes, activated DCs, phagocytosis	Macrophage activation, cDC, phagocytosis, Th17 cell differentiation, response to TNF, TLR, JAK-STAT, MAPK
GO:0060324.split2	face development	4	3	SLED4.3	Neutrophils, monotyes, activated DCs, phagocytosis	Macrophage activation, cDC, phagocytosis, Th17 cell differentiation, response to TNF, TLR, JAK-STAT, MAPK
GO:0065003.split6	protein-containing complex assembly	4	3	SLED4.3	Neutrophils, monotyes, activated DCs, phagocytosis	Macrophage activation, cDC, phagocytosis, Th17 cell differentiation, response to TNF, TLR, JAK-STAT, MAPK
GO:0070542.split3	response to fatty acid	4	3	SLED4.3	Neutrophils, monotyes, activated DCs, phagocytosis	Macrophage activation, cDC, phagocytosis, Th17 cell differentiation, response to TNF, TLR, JAK-STAT, MAPK
GO:0071276.split2	cellular response to cadmium ion	4	3	SLED4.3	Neutrophils, monotyes, activated DCs, phagocytosis	Macrophage activation, cDC, phagocytosis, Th17 cell differentiation, response to TNF, TLR, JAK-STAT, MAPK
GO:0097190.split5	apoptotic signaling pathway	4	3	SLED4.3	Neutrophils, monotyes, activated DCs, phagocytosis	Macrophage activation, cDC, phagocytosis, Th17 cell differentiation, response to TNF, TLR, JAK-STAT, MAPK
GO:2000785.split2	regulation of autophagosome assembly	4	3	SLED4.3	Neutrophils, monotyes, activated DCs, phagocytosis	Macrophage activation, cDC, phagocytosis, Th17 cell differentiation, response to TNF, TLR, JAK-STAT, MAPK
GO:0000164.split1	protein phosphatase type 1 complex	4	3	SLED4.3	Neutrophils, monotyes, activated DCs, phagocytosis	Macrophage activation, cDC, phagocytosis, Th17 cell differentiation, response to TNF, TLR, JAK-STAT, MAPK
GO:0005639.split1	integral component of nuclear inner membrane	4	3	SLED4.3	Neutrophils, monotyes, activated DCs, phagocytosis	Macrophage activation, cDC, phagocytosis, Th17 cell differentiation, response to TNF, TLR, JAK-STAT, MAPK
GO:0005640.split5	nuclear outer membrane	4	3	SLED4.3	Neutrophils, monotyes, activated DCs, phagocytosis	Macrophage activation, cDC, phagocytosis, Th17 cell differentiation, response to TNF, TLR, JAK-STAT, MAPK
GO:0005657.split3	replication fork	4	3	SLED4.3	Neutrophils, monotyes, activated DCs, phagocytosis	Macrophage activation, cDC, phagocytosis, Th17 cell differentiation, response to TNF, TLR, JAK-STAT, MAPK
GO:0098982.split4	GABA-ergic synapse	4	3	SLED4.3	Neutrophils, monotyes, activated DCs, phagocytosis	Macrophage activation, cDC, phagocytosis, Th17 cell differentiation, response to TNF, TLR, JAK-STAT, MAPK
GO:0001540.split8	amyloid-beta binding	4	3	SLED4.3	Neutrophils, monotyes, activated DCs, phagocytosis	Macrophage activation, cDC, phagocytosis, Th17 cell differentiation, response to TNF, TLR, JAK-STAT, MAPK
GO:0003841.split3	1-acylglycerol-3-phosphate O-acyltransferase activity	4	3	SLED4.3	Neutrophils, monotyes, activated DCs, phagocytosis	Macrophage activation, cDC, phagocytosis, Th17 cell differentiation, response to TNF, TLR, JAK-STAT, MAPK
GO:0004553.split2	hydrolase activity, hydrolyzing O-glycosyl compounds	4	3	SLED4.3	Neutrophils, monotyes, activated DCs, phagocytosis	Macrophage activation, cDC, phagocytosis, Th17 cell differentiation, response to TNF, TLR, JAK-STAT, MAPK
GO:0004896.split2	cytokine receptor activity	4	3	SLED4.3	Neutrophils, monotyes, activated DCs, phagocytosis	Macrophage activation, cDC, phagocytosis, Th17 cell differentiation, response to TNF, TLR, JAK-STAT, MAPK
GO:0008656.split2	cysteine-type endopeptidase activator activity involved in apoptotic process	4	3	SLED4.3	Neutrophils, monotyes, activated DCs, phagocytosis	Macrophage activation, cDC, phagocytosis, Th17 cell differentiation, response to TNF, TLR, JAK-STAT, MAPK
GO:0019955.split5	cytokine binding	4	3	SLED4.3	Neutrophils, monotyes, activated DCs, phagocytosis	Macrophage activation, cDC, phagocytosis, Th17 cell differentiation, response to TNF, TLR, JAK-STAT, MAPK
GO:0020037.split6	heme binding	4	3	SLED4.3	Neutrophils, monotyes, activated DCs, phagocytosis	Macrophage activation, cDC, phagocytosis, Th17 cell differentiation, response to TNF, TLR, JAK-STAT, MAPK
GO:0035497.split1	cAMP response element binding	4	3	SLED4.3	Neutrophils, monotyes, activated DCs, phagocytosis	Macrophage activation, cDC, phagocytosis, Th17 cell differentiation, response to TNF, TLR, JAK-STAT, MAPK
R-HSA-187687.split3	Signalling to ERKs	4	3	SLED4.3	Neutrophils, monotyes, activated DCs, phagocytosis	Macrophage activation, cDC, phagocytosis, Th17 cell differentiation, response to TNF, TLR, JAK-STAT, MAPK
R-HSA-193648.split1	NRAGE signals death through JNK	4	3	SLED4.3	Neutrophils, monotyes, activated DCs, phagocytosis	Macrophage activation, cDC, phagocytosis, Th17 cell differentiation, response to TNF, TLR, JAK-STAT, MAPK
R-HSA-2559585.split3	Oncogene Induced Senescence	4	3	SLED4.3	Neutrophils, monotyes, activated DCs, phagocytosis	Macrophage activation, cDC, phagocytosis, Th17 cell differentiation, response to TNF, TLR, JAK-STAT, MAPK
R-HSA-375165.split2	NCAM signaling for neurite out-growth	4	3	SLED4.3	Neutrophils, monotyes, activated DCs, phagocytosis	Macrophage activation, cDC, phagocytosis, Th17 cell differentiation, response to TNF, TLR, JAK-STAT, MAPK
R-HSA-381042.split4	PERK regulates gene expression	4	3	SLED4.3	Neutrophils, monotyes, activated DCs, phagocytosis	Macrophage activation, cDC, phagocytosis, Th17 cell differentiation, response to TNF, TLR, JAK-STAT, MAPK
R-HSA-5675221.split4	Negative regulation of MAPK pathway	4	3	SLED4.3	Neutrophils, monotyes, activated DCs, phagocytosis	Macrophage activation, cDC, phagocytosis, Th17 cell differentiation, response to TNF, TLR, JAK-STAT, MAPK
R-HSA-9696264.split1	RND3 GTPase cycle	4	3	SLED4.3	Neutrophils, monotyes, activated DCs, phagocytosis	Macrophage activation, cDC, phagocytosis, Th17 cell differentiation, response to TNF, TLR, JAK-STAT, MAPK
R-HSA-9696273.split1	RND1 GTPase cycle	4	3	SLED4.3	Neutrophils, monotyes, activated DCs, phagocytosis	Macrophage activation, cDC, phagocytosis, Th17 cell differentiation, response to TNF, TLR, JAK-STAT, MAPK
hsa00561.split2	Glycerolipid metabolism	4	3	SLED4.3	Neutrophils, monotyes, activated DCs, phagocytosis	Macrophage activation, cDC, phagocytosis, Th17 cell differentiation, response to TNF, TLR, JAK-STAT, MAPK
hsa04072.split3	Phospholipase D signaling pathway	4	3	SLED4.3	Neutrophils, monotyes, activated DCs, phagocytosis	Macrophage activation, cDC, phagocytosis, Th17 cell differentiation, response to TNF, TLR, JAK-STAT, MAPK
hsa04261.split5	Adrenergic signaling in cardiomyocytes	4	3	SLED4.3	Neutrophils, monotyes, activated DCs, phagocytosis	Macrophage activation, cDC, phagocytosis, Th17 cell differentiation, response to TNF, TLR, JAK-STAT, MAPK
hsa04620.split3	Toll-like receptor signaling pathway	4	3	SLED4.3	Neutrophils, monotyes, activated DCs, phagocytosis	Macrophage activation, cDC, phagocytosis, Th17 cell differentiation, response to TNF, TLR, JAK-STAT, MAPK
hsa04630.split7	JAK-STAT signaling pathway	4	3	SLED4.3	Neutrophils, monotyes, activated DCs, phagocytosis	Macrophage activation, cDC, phagocytosis, Th17 cell differentiation, response to TNF, TLR, JAK-STAT, MAPK
hsa04659.split5	Th17 cell differentiation	4	3	SLED4.3	Neutrophils, monotyes, activated DCs, phagocytosis	Macrophage activation, cDC, phagocytosis, Th17 cell differentiation, response to TNF, TLR, JAK-STAT, MAPK
hsa04926.split8	Relaxin signaling pathway	4	3	SLED4.3	Neutrophils, monotyes, activated DCs, phagocytosis	Macrophage activation, cDC, phagocytosis, Th17 cell differentiation, response to TNF, TLR, JAK-STAT, MAPK
hsa05200.split3	Pathways in cancer	4	3	SLED4.3	Neutrophils, monotyes, activated DCs, phagocytosis	Macrophage activation, cDC, phagocytosis, Th17 cell differentiation, response to TNF, TLR, JAK-STAT, MAPK
hsa05225.split4	Hepatocellular carcinoma	4	3	SLED4.3	Neutrophils, monotyes, activated DCs, phagocytosis	Macrophage activation, cDC, phagocytosis, Th17 cell differentiation, response to TNF, TLR, JAK-STAT, MAPK
hsa05226.split4	Gastric cancer	4	3	SLED4.3	Neutrophils, monotyes, activated DCs, phagocytosis	Macrophage activation, cDC, phagocytosis, Th17 cell differentiation, response to TNF, TLR, JAK-STAT, MAPK
WP1539.split3	Angiogenesis	4	3	SLED4.3	Neutrophils, monotyes, activated DCs, phagocytosis	Macrophage activation, cDC, phagocytosis, Th17 cell differentiation, response to TNF, TLR, JAK-STAT, MAPK
WP2870.split2	Extracellular vesicle-mediated signaling in recipient cells	4	3	SLED4.3	Neutrophils, monotyes, activated DCs, phagocytosis	Macrophage activation, cDC, phagocytosis, Th17 cell differentiation, response to TNF, TLR, JAK-STAT, MAPK
WP313.split3	Hepatocyte growth factor receptor signaling	4	3	SLED4.3	Neutrophils, monotyes, activated DCs, phagocytosis	Macrophage activation, cDC, phagocytosis, Th17 cell differentiation, response to TNF, TLR, JAK-STAT, MAPK
WP4155.split3	Endometrial cancer	4	3	SLED4.3	Neutrophils, monotyes, activated DCs, phagocytosis	Macrophage activation, cDC, phagocytosis, Th17 cell differentiation, response to TNF, TLR, JAK-STAT, MAPK
WP422.split2	MAPK cascade	4	3	SLED4.3	Neutrophils, monotyes, activated DCs, phagocytosis	Macrophage activation, cDC, phagocytosis, Th17 cell differentiation, response to TNF, TLR, JAK-STAT, MAPK
WP4255.split3	Non-small cell lung cancer	4	3	SLED4.3	Neutrophils, monotyes, activated DCs, phagocytosis	Macrophage activation, cDC, phagocytosis, Th17 cell differentiation, response to TNF, TLR, JAK-STAT, MAPK
WP4262.split5	Breast cancer pathway	4	3	SLED4.3	Neutrophils, monotyes, activated DCs, phagocytosis	Macrophage activation, cDC, phagocytosis, Th17 cell differentiation, response to TNF, TLR, JAK-STAT, MAPK
WP4535.split3	Envelope proteins and their potential roles in EDMD physiopathology	4	3	SLED4.3	Neutrophils, monotyes, activated DCs, phagocytosis	Macrophage activation, cDC, phagocytosis, Th17 cell differentiation, response to TNF, TLR, JAK-STAT, MAPK
WP4719.split5	Eicosanoid metabolism via cyclooxygenases (COX)	4	3	SLED4.3	Neutrophils, monotyes, activated DCs, phagocytosis	Macrophage activation, cDC, phagocytosis, Th17 cell differentiation, response to TNF, TLR, JAK-STAT, MAPK
WP4767.split3	FGFR3 signaling in chondrocyte proliferation and terminal differentiation	4	3	SLED4.3	Neutrophils, monotyes, activated DCs, phagocytosis	Macrophage activation, cDC, phagocytosis, Th17 cell differentiation, response to TNF, TLR, JAK-STAT, MAPK
WP4838.split1	Regucalcin in proximal tubule epithelial kidney cells	4	3	SLED4.3	Neutrophils, monotyes, activated DCs, phagocytosis	Macrophage activation, cDC, phagocytosis, Th17 cell differentiation, response to TNF, TLR, JAK-STAT, MAPK
WP5074.split3	Kallmann syndrome	4	3	SLED4.3	Neutrophils, monotyes, activated DCs, phagocytosis	Macrophage activation, cDC, phagocytosis, Th17 cell differentiation, response to TNF, TLR, JAK-STAT, MAPK
WP5111.split1	Familial hyperlipidemia type 4	4	3	SLED4.3	Neutrophils, monotyes, activated DCs, phagocytosis	Macrophage activation, cDC, phagocytosis, Th17 cell differentiation, response to TNF, TLR, JAK-STAT, MAPK
WP5122.split2	Prostaglandin and leukotriene metabolism in senescence	4	3	SLED4.3	Neutrophils, monotyes, activated DCs, phagocytosis	Macrophage activation, cDC, phagocytosis, Th17 cell differentiation, response to TNF, TLR, JAK-STAT, MAPK
M12.10.split2	Inflammation	4	3	SLED4.3	Neutrophils, monotyes, activated DCs, phagocytosis	Macrophage activation, cDC, phagocytosis, Th17 cell differentiation, response to TNF, TLR, JAK-STAT, MAPK
M15.66.split2	TBD	4	3	SLED4.3	Neutrophils, monotyes, activated DCs, phagocytosis	Macrophage activation, cDC, phagocytosis, Th17 cell differentiation, response to TNF, TLR, JAK-STAT, MAPK
M16.101.split1	TBD	4	3	SLED4.3	Neutrophils, monotyes, activated DCs, phagocytosis	Macrophage activation, cDC, phagocytosis, Th17 cell differentiation, response to TNF, TLR, JAK-STAT, MAPK
cDC.split4	cDC	4	3	SLED4.3	Neutrophils, monotyes, activated DCs, phagocytosis	Macrophage activation, cDC, phagocytosis, Th17 cell differentiation, response to TNF, TLR, JAK-STAT, MAPK
LI.M55.split1	TBA	4	4	SLED4.4	Neutrophils, monotyes, activated DCs, phagocytosis	NKT cells, IL1b production, CD40 signaling, PI3K signaling
LI.M140.split2	extracellular matrix, complement	4	4	SLED4.4	Neutrophils, monotyes, activated DCs, phagocytosis	NKT cells, IL1b production, CD40 signaling, PI3K signaling
LI.M192.split1	TBA	4	4	SLED4.4	Neutrophils, monotyes, activated DCs, phagocytosis	NKT cells, IL1b production, CD40 signaling, PI3K signaling
DC.M8.69.split1	Undetermined	4	4	SLED4.4	Neutrophils, monotyes, activated DCs, phagocytosis	NKT cells, IL1b production, CD40 signaling, PI3K signaling
GO:0019395.split1	fatty acid oxidation	4	4	SLED4.4	Neutrophils, monotyes, activated DCs, phagocytosis	NKT cells, IL1b production, CD40 signaling, PI3K signaling
GO:0023035.split2	CD40 signaling pathway	4	4	SLED4.4	Neutrophils, monotyes, activated DCs, phagocytosis	NKT cells, IL1b production, CD40 signaling, PI3K signaling
GO:0030100.split4	regulation of endocytosis	4	4	SLED4.4	Neutrophils, monotyes, activated DCs, phagocytosis	NKT cells, IL1b production, CD40 signaling, PI3K signaling
GO:0030534.split3	adult behavior	4	4	SLED4.4	Neutrophils, monotyes, activated DCs, phagocytosis	NKT cells, IL1b production, CD40 signaling, PI3K signaling
GO:0030866.split4	cortical actin cytoskeleton organization	4	4	SLED4.4	Neutrophils, monotyes, activated DCs, phagocytosis	NKT cells, IL1b production, CD40 signaling, PI3K signaling
GO:0032226	positive regulation of synaptic transmission, dopaminergic	4	4	SLED4.4	Neutrophils, monotyes, activated DCs, phagocytosis	NKT cells, IL1b production, CD40 signaling, PI3K signaling
GO:0032515.split2	negative regulation of phosphoprotein phosphatase activity	4	4	SLED4.4	Neutrophils, monotyes, activated DCs, phagocytosis	NKT cells, IL1b production, CD40 signaling, PI3K signaling
GO:0032731.split5	positive regulation of interleukin-1 beta production	4	4	SLED4.4	Neutrophils, monotyes, activated DCs, phagocytosis	NKT cells, IL1b production, CD40 signaling, PI3K signaling
GO:0060291.split1	long-term synaptic potentiation	4	4	SLED4.4	Neutrophils, monotyes, activated DCs, phagocytosis	NKT cells, IL1b production, CD40 signaling, PI3K signaling
GO:0071364.split5	cellular response to epidermal growth factor stimulus	4	4	SLED4.4	Neutrophils, monotyes, activated DCs, phagocytosis	NKT cells, IL1b production, CD40 signaling, PI3K signaling
GO:2000363	positive regulation of prostaglandin-E synthase activity	4	4	SLED4.4	Neutrophils, monotyes, activated DCs, phagocytosis	NKT cells, IL1b production, CD40 signaling, PI3K signaling
GO:2001243.split3	negative regulation of intrinsic apoptotic signaling pathway	4	4	SLED4.4	Neutrophils, monotyes, activated DCs, phagocytosis	NKT cells, IL1b production, CD40 signaling, PI3K signaling
GO:0031093.split1	platelet alpha granule lumen	4	4	SLED4.4	Neutrophils, monotyes, activated DCs, phagocytosis	NKT cells, IL1b production, CD40 signaling, PI3K signaling
GO:0032580.split4	Golgi cisterna membrane	4	4	SLED4.4	Neutrophils, monotyes, activated DCs, phagocytosis	NKT cells, IL1b production, CD40 signaling, PI3K signaling
GO:0045171.split7	intercellular bridge	4	4	SLED4.4	Neutrophils, monotyes, activated DCs, phagocytosis	NKT cells, IL1b production, CD40 signaling, PI3K signaling
GO:0004435.split4	phosphatidylinositol phospholipase C activity	4	4	SLED4.4	Neutrophils, monotyes, activated DCs, phagocytosis	NKT cells, IL1b production, CD40 signaling, PI3K signaling
GO:0017166.split2	vinculin binding	4	4	SLED4.4	Neutrophils, monotyes, activated DCs, phagocytosis	NKT cells, IL1b production, CD40 signaling, PI3K signaling
GO:0019900.split9	kinase binding	4	4	SLED4.4	Neutrophils, monotyes, activated DCs, phagocytosis	NKT cells, IL1b production, CD40 signaling, PI3K signaling
GO:0032266.split2	phosphatidylinositol-3-phosphate binding	4	4	SLED4.4	Neutrophils, monotyes, activated DCs, phagocytosis	NKT cells, IL1b production, CD40 signaling, PI3K signaling
R-HSA-1592389.split3	Activation of Matrix Metalloproteinases	4	4	SLED4.4	Neutrophils, monotyes, activated DCs, phagocytosis	NKT cells, IL1b production, CD40 signaling, PI3K signaling
R-HSA-917977.split2	Transferrin endocytosis and recycling	4	4	SLED4.4	Neutrophils, monotyes, activated DCs, phagocytosis	NKT cells, IL1b production, CD40 signaling, PI3K signaling
R-HSA-9614657.split2	FOXO-mediated transcription of cell death genes	4	4	SLED4.4	Neutrophils, monotyes, activated DCs, phagocytosis	NKT cells, IL1b production, CD40 signaling, PI3K signaling
WP4342	Vitamins A and D - action mechanisms	4	4	SLED4.4	Neutrophils, monotyes, activated DCs, phagocytosis	NKT cells, IL1b production, CD40 signaling, PI3K signaling
NKT.split1	NKT	4	4	SLED4.4	Neutrophils, monotyes, activated DCs, phagocytosis	NKT cells, IL1b production, CD40 signaling, PI3K signaling
LI.M79.split2	TBA	4	5	SLED4.5	Neutrophils, monotyes, activated DCs, phagocytosis	Mast cell degranulation, complement and coagulation cascades, MAP2K/MAPK and PI3K activation
DC.M2.1.split5	Undetermined	4	5	SLED4.5	Neutrophils, monotyes, activated DCs, phagocytosis	Mast cell degranulation, complement and coagulation cascades, MAP2K/MAPK and PI3K activation
GO:0006654.split4	phosphatidic acid biosynthetic process	4	5	SLED4.5	Neutrophils, monotyes, activated DCs, phagocytosis	Mast cell degranulation, complement and coagulation cascades, MAP2K/MAPK and PI3K activation
GO:0008286.split2	insulin receptor signaling pathway	4	5	SLED4.5	Neutrophils, monotyes, activated DCs, phagocytosis	Mast cell degranulation, complement and coagulation cascades, MAP2K/MAPK and PI3K activation
GO:0031333.split2	negative regulation of protein-containing complex assembly	4	5	SLED4.5	Neutrophils, monotyes, activated DCs, phagocytosis	Mast cell degranulation, complement and coagulation cascades, MAP2K/MAPK and PI3K activation
GO:0035023.split2	regulation of Rho protein signal transduction	4	5	SLED4.5	Neutrophils, monotyes, activated DCs, phagocytosis	Mast cell degranulation, complement and coagulation cascades, MAP2K/MAPK and PI3K activation
GO:0036152.split3	phosphatidylethanolamine acyl-chain remodeling	4	5	SLED4.5	Neutrophils, monotyes, activated DCs, phagocytosis	Mast cell degranulation, complement and coagulation cascades, MAP2K/MAPK and PI3K activation
GO:0042531.split3	positive regulation of tyrosine phosphorylation of STAT protein	4	5	SLED4.5	Neutrophils, monotyes, activated DCs, phagocytosis	Mast cell degranulation, complement and coagulation cascades, MAP2K/MAPK and PI3K activation
GO:0043306.split1	positive regulation of mast cell degranulation	4	5	SLED4.5	Neutrophils, monotyes, activated DCs, phagocytosis	Mast cell degranulation, complement and coagulation cascades, MAP2K/MAPK and PI3K activation
GO:0048814.split3	regulation of dendrite morphogenesis	4	5	SLED4.5	Neutrophils, monotyes, activated DCs, phagocytosis	Mast cell degranulation, complement and coagulation cascades, MAP2K/MAPK and PI3K activation
GO:0097242.split3	amyloid-beta clearance	4	5	SLED4.5	Neutrophils, monotyes, activated DCs, phagocytosis	Mast cell degranulation, complement and coagulation cascades, MAP2K/MAPK and PI3K activation
GO:1900026.split5	positive regulation of substrate adhesion-dependent cell spreading	4	5	SLED4.5	Neutrophils, monotyes, activated DCs, phagocytosis	Mast cell degranulation, complement and coagulation cascades, MAP2K/MAPK and PI3K activation
GO:1900029.split3	positive regulation of ruffle assembly	4	5	SLED4.5	Neutrophils, monotyes, activated DCs, phagocytosis	Mast cell degranulation, complement and coagulation cascades, MAP2K/MAPK and PI3K activation
GO:0055037.split10	recycling endosome	4	5	SLED4.5	Neutrophils, monotyes, activated DCs, phagocytosis	Mast cell degranulation, complement and coagulation cascades, MAP2K/MAPK and PI3K activation
GO:0070821.split4	tertiary granule membrane	4	5	SLED4.5	Neutrophils, monotyes, activated DCs, phagocytosis	Mast cell degranulation, complement and coagulation cascades, MAP2K/MAPK and PI3K activation
GO:0005041.split3	low-density lipoprotein particle receptor activity	4	5	SLED4.5	Neutrophils, monotyes, activated DCs, phagocytosis	Mast cell degranulation, complement and coagulation cascades, MAP2K/MAPK and PI3K activation
GO:0008237.split1	metallopeptidase activity	4	5	SLED4.5	Neutrophils, monotyes, activated DCs, phagocytosis	Mast cell degranulation, complement and coagulation cascades, MAP2K/MAPK and PI3K activation
GO:0008374.split2	O-acyltransferase activity	4	5	SLED4.5	Neutrophils, monotyes, activated DCs, phagocytosis	Mast cell degranulation, complement and coagulation cascades, MAP2K/MAPK and PI3K activation
GO:0030246.split6	carbohydrate binding	4	5	SLED4.5	Neutrophils, monotyes, activated DCs, phagocytosis	Mast cell degranulation, complement and coagulation cascades, MAP2K/MAPK and PI3K activation
R-HSA-211897.split3	Cytochrome P450 - arranged by substrate type	4	5	SLED4.5	Neutrophils, monotyes, activated DCs, phagocytosis	Mast cell degranulation, complement and coagulation cascades, MAP2K/MAPK and PI3K activation
R-HSA-2142691.split2	Synthesis of Leukotrienes (LT) and Eoxins (EX)	4	5	SLED4.5	Neutrophils, monotyes, activated DCs, phagocytosis	Mast cell degranulation, complement and coagulation cascades, MAP2K/MAPK and PI3K activation
R-HSA-5674135.split4	MAP2K and MAPK activation	4	5	SLED4.5	Neutrophils, monotyes, activated DCs, phagocytosis	Mast cell degranulation, complement and coagulation cascades, MAP2K/MAPK and PI3K activation
R-HSA-8980692.split8	RHOA GTPase cycle	4	5	SLED4.5	Neutrophils, monotyes, activated DCs, phagocytosis	Mast cell degranulation, complement and coagulation cascades, MAP2K/MAPK and PI3K activation
R-HSA-9027276.split1	Erythropoietin activates Phosphoinositide-3-kinase (PI3K)	4	5	SLED4.5	Neutrophils, monotyes, activated DCs, phagocytosis	Mast cell degranulation, complement and coagulation cascades, MAP2K/MAPK and PI3K activation
hsa05219.split3	Bladder cancer	4	5	SLED4.5	Neutrophils, monotyes, activated DCs, phagocytosis	Mast cell degranulation, complement and coagulation cascades, MAP2K/MAPK and PI3K activation
WP2828.split4	Bladder cancer	4	5	SLED4.5	Neutrophils, monotyes, activated DCs, phagocytosis	Mast cell degranulation, complement and coagulation cascades, MAP2K/MAPK and PI3K activation
WP2880.split2	Glucocorticoid receptor pathway	4	5	SLED4.5	Neutrophils, monotyes, activated DCs, phagocytosis	Mast cell degranulation, complement and coagulation cascades, MAP2K/MAPK and PI3K activation
WP4553.split3	FBXL10 enhancement of MAP/ERK signaling in diffuse large B-cell lymphoma	4	5	SLED4.5	Neutrophils, monotyes, activated DCs, phagocytosis	Mast cell degranulation, complement and coagulation cascades, MAP2K/MAPK and PI3K activation
WP558.split4	Complement and coagulation cascades	4	5	SLED4.5	Neutrophils, monotyes, activated DCs, phagocytosis	Mast cell degranulation, complement and coagulation cascades, MAP2K/MAPK and PI3K activation
M12.10.split1	Inflammation	4	5	SLED4.5	Neutrophils, monotyes, activated DCs, phagocytosis	Mast cell degranulation, complement and coagulation cascades, MAP2K/MAPK and PI3K activation
M15.13.split3	TBD	4	5	SLED4.5	Neutrophils, monotyes, activated DCs, phagocytosis	Mast cell degranulation, complement and coagulation cascades, MAP2K/MAPK and PI3K activation
M16.20.split6	TBD	4	5	SLED4.5	Neutrophils, monotyes, activated DCs, phagocytosis	Mast cell degranulation, complement and coagulation cascades, MAP2K/MAPK and PI3K activation
M16.70.split1	TBD	4	5	SLED4.5	Neutrophils, monotyes, activated DCs, phagocytosis	Mast cell degranulation, complement and coagulation cascades, MAP2K/MAPK and PI3K activation
M16.101.split2	TBD	4	5	SLED4.5	Neutrophils, monotyes, activated DCs, phagocytosis	Mast cell degranulation, complement and coagulation cascades, MAP2K/MAPK and PI3K activation
DC.M8.31.split3	Undetermined	4	6	SLED4.6	Neutrophils, monotyes, activated DCs, phagocytosis	IGF1R signaling
GO:0048013.split2	ephrin receptor signaling pathway	4	6	SLED4.6	Neutrophils, monotyes, activated DCs, phagocytosis	IGF1R signaling
GO:0008146.split4	sulfotransferase activity	4	6	SLED4.6	Neutrophils, monotyes, activated DCs, phagocytosis	IGF1R signaling
R-HSA-2404192.split1	Signaling by Type 1 Insulin-like Growth Factor 1 Receptor (IGF1R)	4	6	SLED4.6	Neutrophils, monotyes, activated DCs, phagocytosis	IGF1R signaling
R-HSA-74713	IRS activation	4	6	SLED4.6	Neutrophils, monotyes, activated DCs, phagocytosis	IGF1R signaling
R-HSA-74749.split1	Signal attenuation	4	6	SLED4.6	Neutrophils, monotyes, activated DCs, phagocytosis	IGF1R signaling
WP2879.split1	Farnesoid X receptor pathway	4	6	SLED4.6	Neutrophils, monotyes, activated DCs, phagocytosis	IGF1R signaling
WP3935.split3	Leptin-insulin signaling overlap	4	6	SLED4.6	Neutrophils, monotyes, activated DCs, phagocytosis	IGF1R signaling
LI.M4.0.split3	cell cycle and transcription	5	1	SLED5.1	Cell cycle, cell division in stimulated CD4 T cells, plasma cells	Cell cycle, pro-B cells, plasma cells, erythrocytes
LI.M4.1.split1	cell cycle (I)	5	1	SLED5.1	Cell cycle, cell division in stimulated CD4 T cells, plasma cells	Cell cycle, pro-B cells, plasma cells, erythrocytes
LI.M4.1.split2	cell cycle (I)	5	1	SLED5.1	Cell cycle, cell division in stimulated CD4 T cells, plasma cells	Cell cycle, pro-B cells, plasma cells, erythrocytes
LI.M4.12	C-MYC transcriptional network	5	1	SLED5.1	Cell cycle, cell division in stimulated CD4 T cells, plasma cells	Cell cycle, pro-B cells, plasma cells, erythrocytes
DC.M3.3.split1	Cell Cycle	5	1	SLED5.1	Cell cycle, cell division in stimulated CD4 T cells, plasma cells	Cell cycle, pro-B cells, plasma cells, erythrocytes
GO:0006235	dTTP biosynthetic process	5	1	SLED5.1	Cell cycle, cell division in stimulated CD4 T cells, plasma cells	Cell cycle, pro-B cells, plasma cells, erythrocytes
GO:0051301.split4	cell division	5	1	SLED5.1	Cell cycle, cell division in stimulated CD4 T cells, plasma cells	Cell cycle, pro-B cells, plasma cells, erythrocytes
GO:0005694.split4	chromosome	5	1	SLED5.1	Cell cycle, cell division in stimulated CD4 T cells, plasma cells	Cell cycle, pro-B cells, plasma cells, erythrocytes
GO:0005813.split3	centrosome	5	1	SLED5.1	Cell cycle, cell division in stimulated CD4 T cells, plasma cells	Cell cycle, pro-B cells, plasma cells, erythrocytes
GO:0000987.split3	cis-regulatory region sequence-specific DNA binding	5	1	SLED5.1	Cell cycle, cell division in stimulated CD4 T cells, plasma cells	Cell cycle, pro-B cells, plasma cells, erythrocytes
R-HSA-1640170.split4	Cell Cycle	5	1	SLED5.1	Cell cycle, cell division in stimulated CD4 T cells, plasma cells	Cell cycle, pro-B cells, plasma cells, erythrocytes
R-HSA-176409.split5	APC/C:Cdc20 mediated degradation of mitotic proteins	5	1	SLED5.1	Cell cycle, cell division in stimulated CD4 T cells, plasma cells	Cell cycle, pro-B cells, plasma cells, erythrocytes
R-HSA-179409.split1	APC-Cdc20 mediated degradation of Nek2A	5	1	SLED5.1	Cell cycle, cell division in stimulated CD4 T cells, plasma cells	Cell cycle, pro-B cells, plasma cells, erythrocytes
R-HSA-2555396.split3	Mitotic Metaphase and Anaphase	5	1	SLED5.1	Cell cycle, cell division in stimulated CD4 T cells, plasma cells	Cell cycle, pro-B cells, plasma cells, erythrocytes
R-HSA-453276.split2	Regulation of mitotic cell cycle	5	1	SLED5.1	Cell cycle, cell division in stimulated CD4 T cells, plasma cells	Cell cycle, pro-B cells, plasma cells, erythrocytes
R-HSA-453279.split2	Mitotic G1 phase and G1/S transition	5	1	SLED5.1	Cell cycle, cell division in stimulated CD4 T cells, plasma cells	Cell cycle, pro-B cells, plasma cells, erythrocytes
R-HSA-68867.split2	Assembly of the pre-replicative complex	5	1	SLED5.1	Cell cycle, cell division in stimulated CD4 T cells, plasma cells	Cell cycle, pro-B cells, plasma cells, erythrocytes
R-HSA-68882.split4	Mitotic Anaphase	5	1	SLED5.1	Cell cycle, cell division in stimulated CD4 T cells, plasma cells	Cell cycle, pro-B cells, plasma cells, erythrocytes
R-HSA-68886.split5	M Phase	5	1	SLED5.1	Cell cycle, cell division in stimulated CD4 T cells, plasma cells	Cell cycle, pro-B cells, plasma cells, erythrocytes
R-HSA-69205.split2	G1/S-Specific Transcription	5	1	SLED5.1	Cell cycle, cell division in stimulated CD4 T cells, plasma cells	Cell cycle, pro-B cells, plasma cells, erythrocytes
R-HSA-69206.split4	G1/S Transition	5	1	SLED5.1	Cell cycle, cell division in stimulated CD4 T cells, plasma cells	Cell cycle, pro-B cells, plasma cells, erythrocytes
R-HSA-69242.split3	S Phase	5	1	SLED5.1	Cell cycle, cell division in stimulated CD4 T cells, plasma cells	Cell cycle, pro-B cells, plasma cells, erythrocytes
R-HSA-69278.split5	Cell Cycle, Mitotic	5	1	SLED5.1	Cell cycle, cell division in stimulated CD4 T cells, plasma cells	Cell cycle, pro-B cells, plasma cells, erythrocytes
R-HSA-69306.split3	DNA Replication	5	1	SLED5.1	Cell cycle, cell division in stimulated CD4 T cells, plasma cells	Cell cycle, pro-B cells, plasma cells, erythrocytes
R-HSA-69620.split3	Cell Cycle Checkpoints	5	1	SLED5.1	Cell cycle, cell division in stimulated CD4 T cells, plasma cells	Cell cycle, pro-B cells, plasma cells, erythrocytes
R-HSA-73886.split4	Chromosome Maintenance	5	1	SLED5.1	Cell cycle, cell division in stimulated CD4 T cells, plasma cells	Cell cycle, pro-B cells, plasma cells, erythrocytes
hsa00983.split4	Drug metabolism - other enzymes	5	1	SLED5.1	Cell cycle, cell division in stimulated CD4 T cells, plasma cells	Cell cycle, pro-B cells, plasma cells, erythrocytes
hsa05166.split6	Human T-cell leukemia virus 1 infection	5	1	SLED5.1	Cell cycle, cell division in stimulated CD4 T cells, plasma cells	Cell cycle, pro-B cells, plasma cells, erythrocytes
WP179.split1	Cell cycle	5	1	SLED5.1	Cell cycle, cell division in stimulated CD4 T cells, plasma cells	Cell cycle, pro-B cells, plasma cells, erythrocytes
WP2446.split1	Retinoblastoma gene in cancer	5	1	SLED5.1	Cell cycle, cell division in stimulated CD4 T cells, plasma cells	Cell cycle, pro-B cells, plasma cells, erythrocytes
M12.15.split1	Plasma cells	5	1	SLED5.1	Cell cycle, cell division in stimulated CD4 T cells, plasma cells	Cell cycle, pro-B cells, plasma cells, erythrocytes
Erythrocytes.split2	Erythrocytes	5	1	SLED5.1	Cell cycle, cell division in stimulated CD4 T cells, plasma cells	Cell cycle, pro-B cells, plasma cells, erythrocytes
pro_B_cells.split6	pro_B_cells	5	1	SLED5.1	Cell cycle, cell division in stimulated CD4 T cells, plasma cells	Cell cycle, pro-B cells, plasma cells, erythrocytes
LI.M4.1.split3	cell cycle (I)	5	2	SLED5.2	Cell cycle, cell division in stimulated CD4 T cells, plasma cells	Cell cycle, plasma cells, complement,cell division in stimulated CD4 T cells
LI.M4.6.split3	cell division in stimulated CD4 T cells	5	2	SLED5.2	Cell cycle, cell division in stimulated CD4 T cells, plasma cells	Cell cycle, plasma cells, complement,cell division in stimulated CD4 T cells
LI.M4.7.split2	mitotic cell cycle	5	2	SLED5.2	Cell cycle, cell division in stimulated CD4 T cells, plasma cells	Cell cycle, plasma cells, complement,cell division in stimulated CD4 T cells
LI.M4.10.split2	cell cycle (II)	5	2	SLED5.2	Cell cycle, cell division in stimulated CD4 T cells, plasma cells	Cell cycle, plasma cells, complement,cell division in stimulated CD4 T cells
LI.M103.split3	cell cycle (III)	5	2	SLED5.2	Cell cycle, cell division in stimulated CD4 T cells, plasma cells	Cell cycle, plasma cells, complement,cell division in stimulated CD4 T cells
DC.M3.3.split2	Cell Cycle	5	2	SLED5.2	Cell cycle, cell division in stimulated CD4 T cells, plasma cells	Cell cycle, plasma cells, complement,cell division in stimulated CD4 T cells
DC.M6.16.split3	Cell Cycle	5	2	SLED5.2	Cell cycle, cell division in stimulated CD4 T cells, plasma cells	Cell cycle, plasma cells, complement,cell division in stimulated CD4 T cells
DC.M9.35.split1	Undetermined	5	2	SLED5.2	Cell cycle, cell division in stimulated CD4 T cells, plasma cells	Cell cycle, plasma cells, complement,cell division in stimulated CD4 T cells
DC.M9.42.split3	Cell Cycle	5	2	SLED5.2	Cell cycle, cell division in stimulated CD4 T cells, plasma cells	Cell cycle, plasma cells, complement,cell division in stimulated CD4 T cells
GO:0000070.split1	mitotic sister chromatid segregation	5	2	SLED5.2	Cell cycle, cell division in stimulated CD4 T cells, plasma cells	Cell cycle, plasma cells, complement,cell division in stimulated CD4 T cells
GO:0000082.split5	G1/S transition of mitotic cell cycle	5	2	SLED5.2	Cell cycle, cell division in stimulated CD4 T cells, plasma cells	Cell cycle, plasma cells, complement,cell division in stimulated CD4 T cells
GO:0000727.split1	double-strand break repair via break-induced replication	5	2	SLED5.2	Cell cycle, cell division in stimulated CD4 T cells, plasma cells	Cell cycle, plasma cells, complement,cell division in stimulated CD4 T cells
GO:0007049.split1	cell cycle	5	2	SLED5.2	Cell cycle, cell division in stimulated CD4 T cells, plasma cells	Cell cycle, plasma cells, complement,cell division in stimulated CD4 T cells
GO:0007052.split3	mitotic spindle organization	5	2	SLED5.2	Cell cycle, cell division in stimulated CD4 T cells, plasma cells	Cell cycle, plasma cells, complement,cell division in stimulated CD4 T cells
GO:0007080.split3	mitotic metaphase plate congression	5	2	SLED5.2	Cell cycle, cell division in stimulated CD4 T cells, plasma cells	Cell cycle, plasma cells, complement,cell division in stimulated CD4 T cells
GO:0010389.split2	regulation of G2/M transition of mitotic cell cycle	5	2	SLED5.2	Cell cycle, cell division in stimulated CD4 T cells, plasma cells	Cell cycle, plasma cells, complement,cell division in stimulated CD4 T cells
GO:0034644.split2	cellular response to UV	5	2	SLED5.2	Cell cycle, cell division in stimulated CD4 T cells, plasma cells	Cell cycle, plasma cells, complement,cell division in stimulated CD4 T cells
GO:0036120.split4	cellular response to platelet-derived growth factor stimulus	5	2	SLED5.2	Cell cycle, cell division in stimulated CD4 T cells, plasma cells	Cell cycle, plasma cells, complement,cell division in stimulated CD4 T cells
GO:0044772.split1	mitotic cell cycle phase transition	5	2	SLED5.2	Cell cycle, cell division in stimulated CD4 T cells, plasma cells	Cell cycle, plasma cells, complement,cell division in stimulated CD4 T cells
GO:0045143	homologous chromosome segregation	5	2	SLED5.2	Cell cycle, cell division in stimulated CD4 T cells, plasma cells	Cell cycle, plasma cells, complement,cell division in stimulated CD4 T cells
GO:0051256	mitotic spindle midzone assembly	5	2	SLED5.2	Cell cycle, cell division in stimulated CD4 T cells, plasma cells	Cell cycle, plasma cells, complement,cell division in stimulated CD4 T cells
GO:1900264.split2	positive regulation of DNA-directed DNA polymerase activity	5	2	SLED5.2	Cell cycle, cell division in stimulated CD4 T cells, plasma cells	Cell cycle, plasma cells, complement,cell division in stimulated CD4 T cells
GO:0000776.split2	kinetochore	5	2	SLED5.2	Cell cycle, cell division in stimulated CD4 T cells, plasma cells	Cell cycle, plasma cells, complement,cell division in stimulated CD4 T cells
GO:0000811	GINS complex	5	2	SLED5.2	Cell cycle, cell division in stimulated CD4 T cells, plasma cells	Cell cycle, plasma cells, complement,cell division in stimulated CD4 T cells
GO:0005819.split3	spindle	5	2	SLED5.2	Cell cycle, cell division in stimulated CD4 T cells, plasma cells	Cell cycle, plasma cells, complement,cell division in stimulated CD4 T cells
GO:0005876.split1	spindle microtubule	5	2	SLED5.2	Cell cycle, cell division in stimulated CD4 T cells, plasma cells	Cell cycle, plasma cells, complement,cell division in stimulated CD4 T cells
GO:0031616.split1	spindle pole centrosome	5	2	SLED5.2	Cell cycle, cell division in stimulated CD4 T cells, plasma cells	Cell cycle, plasma cells, complement,cell division in stimulated CD4 T cells
GO:0032133	chromosome passenger complex	5	2	SLED5.2	Cell cycle, cell division in stimulated CD4 T cells, plasma cells	Cell cycle, plasma cells, complement,cell division in stimulated CD4 T cells
GO:0045120	pronucleus	5	2	SLED5.2	Cell cycle, cell division in stimulated CD4 T cells, plasma cells	Cell cycle, plasma cells, complement,cell division in stimulated CD4 T cells
GO:1990023.split1	mitotic spindle midzone	5	2	SLED5.2	Cell cycle, cell division in stimulated CD4 T cells, plasma cells	Cell cycle, plasma cells, complement,cell division in stimulated CD4 T cells
GO:0003774.split5	cytoskeletal motor activity	5	2	SLED5.2	Cell cycle, cell division in stimulated CD4 T cells, plasma cells	Cell cycle, plasma cells, complement,cell division in stimulated CD4 T cells
R-HSA-113510.split1	E2F mediated regulation of DNA replication	5	2	SLED5.2	Cell cycle, cell division in stimulated CD4 T cells, plasma cells	Cell cycle, plasma cells, complement,cell division in stimulated CD4 T cells
R-HSA-1362300.split2	Transcription of E2F targets under negative control by p107 (RBL1) and p130 (RBL2) in complex with HDAC1	5	2	SLED5.2	Cell cycle, cell division in stimulated CD4 T cells, plasma cells	Cell cycle, plasma cells, complement,cell division in stimulated CD4 T cells
R-HSA-176412.split1	Phosphorylation of the APC/C	5	2	SLED5.2	Cell cycle, cell division in stimulated CD4 T cells, plasma cells	Cell cycle, plasma cells, complement,cell division in stimulated CD4 T cells
R-HSA-176417	Phosphorylation of Emi1	5	2	SLED5.2	Cell cycle, cell division in stimulated CD4 T cells, plasma cells	Cell cycle, plasma cells, complement,cell division in stimulated CD4 T cells
R-HSA-176974.split2	Unwinding of DNA	5	2	SLED5.2	Cell cycle, cell division in stimulated CD4 T cells, plasma cells	Cell cycle, plasma cells, complement,cell division in stimulated CD4 T cells
R-HSA-2467813.split2	Separation of Sister Chromatids	5	2	SLED5.2	Cell cycle, cell division in stimulated CD4 T cells, plasma cells	Cell cycle, plasma cells, complement,cell division in stimulated CD4 T cells
R-HSA-380259.split3	Loss of Nlp from mitotic centrosomes	5	2	SLED5.2	Cell cycle, cell division in stimulated CD4 T cells, plasma cells	Cell cycle, plasma cells, complement,cell division in stimulated CD4 T cells
R-HSA-453274.split4	Mitotic G2-G2/M phases	5	2	SLED5.2	Cell cycle, cell division in stimulated CD4 T cells, plasma cells	Cell cycle, plasma cells, complement,cell division in stimulated CD4 T cells
R-HSA-6804114.split2	TP53 Regulates Transcription of Genes Involved in G2 Cell Cycle Arrest	5	2	SLED5.2	Cell cycle, cell division in stimulated CD4 T cells, plasma cells	Cell cycle, plasma cells, complement,cell division in stimulated CD4 T cells
R-HSA-69478	G2/M DNA replication checkpoint	5	2	SLED5.2	Cell cycle, cell division in stimulated CD4 T cells, plasma cells	Cell cycle, plasma cells, complement,cell division in stimulated CD4 T cells
R-HSA-75035.split1	Chk1/Chk2(Cds1) mediated inactivation of Cyclin B:Cdk1 complex	5	2	SLED5.2	Cell cycle, cell division in stimulated CD4 T cells, plasma cells	Cell cycle, plasma cells, complement,cell division in stimulated CD4 T cells
R-HSA-9696270.split1	RND2 GTPase cycle	5	2	SLED5.2	Cell cycle, cell division in stimulated CD4 T cells, plasma cells	Cell cycle, plasma cells, complement,cell division in stimulated CD4 T cells
WP1530.split2	miRNA regulation of DNA damage response	5	2	SLED5.2	Cell cycle, cell division in stimulated CD4 T cells, plasma cells	Cell cycle, plasma cells, complement,cell division in stimulated CD4 T cells
WP1601.split2	Fluoropyrimidine activity	5	2	SLED5.2	Cell cycle, cell division in stimulated CD4 T cells, plasma cells	Cell cycle, plasma cells, complement,cell division in stimulated CD4 T cells
WP2038.split5	Microtubule cytoskeleton regulation	5	2	SLED5.2	Cell cycle, cell division in stimulated CD4 T cells, plasma cells	Cell cycle, plasma cells, complement,cell division in stimulated CD4 T cells
WP2363.split3	Gastric cancer network 2	5	2	SLED5.2	Cell cycle, cell division in stimulated CD4 T cells, plasma cells	Cell cycle, plasma cells, complement,cell division in stimulated CD4 T cells
WP2516.split2	ATM signaling pathway	5	2	SLED5.2	Cell cycle, cell division in stimulated CD4 T cells, plasma cells	Cell cycle, plasma cells, complement,cell division in stimulated CD4 T cells
WP3611.split4	Photodynamic therapy-induced AP-1 survival signaling	5	2	SLED5.2	Cell cycle, cell division in stimulated CD4 T cells, plasma cells	Cell cycle, plasma cells, complement,cell division in stimulated CD4 T cells
WP5117.split1	Cohesin complex - Cornelia de Lange syndrome	5	2	SLED5.2	Cell cycle, cell division in stimulated CD4 T cells, plasma cells	Cell cycle, plasma cells, complement,cell division in stimulated CD4 T cells
M15.110.split1	Plasma cells	5	2	SLED5.2	Cell cycle, cell division in stimulated CD4 T cells, plasma cells	Cell cycle, plasma cells, complement,cell division in stimulated CD4 T cells
M16.30.split2	Complement	5	2	SLED5.2	Cell cycle, cell division in stimulated CD4 T cells, plasma cells	Cell cycle, plasma cells, complement,cell division in stimulated CD4 T cells
M16.60.split3	Plasma cells	5	2	SLED5.2	Cell cycle, cell division in stimulated CD4 T cells, plasma cells	Cell cycle, plasma cells, complement,cell division in stimulated CD4 T cells
M16.92.split2	Plasma cells	5	2	SLED5.2	Cell cycle, cell division in stimulated CD4 T cells, plasma cells	Cell cycle, plasma cells, complement,cell division in stimulated CD4 T cells
M16.92.split3	Plasma cells	5	2	SLED5.2	Cell cycle, cell division in stimulated CD4 T cells, plasma cells	Cell cycle, plasma cells, complement,cell division in stimulated CD4 T cells
LI.M4.2.split1	PLK1 signaling events	5	3	SLED5.3	Cell cycle, cell division in stimulated CD4 T cells, plasma cells	Cell cycle, cell division in stimulated CD4 T cells, Tgd cells, plasma cells, MHC-II signaling
LI.M4.2.split2	PLK1 signaling events	5	3	SLED5.3	Cell cycle, cell division in stimulated CD4 T cells, plasma cells	Cell cycle, cell division in stimulated CD4 T cells, Tgd cells, plasma cells, MHC-II signaling
LI.M4.4.split2	mitotic cell cycle - DNA replication	5	3	SLED5.3	Cell cycle, cell division in stimulated CD4 T cells, plasma cells	Cell cycle, cell division in stimulated CD4 T cells, Tgd cells, plasma cells, MHC-II signaling
LI.M4.6.split2	cell division in stimulated CD4 T cells	5	3	SLED5.3	Cell cycle, cell division in stimulated CD4 T cells, plasma cells	Cell cycle, cell division in stimulated CD4 T cells, Tgd cells, plasma cells, MHC-II signaling
LI.M4.8.split1	cell division - E2F transcription network	5	3	SLED5.3	Cell cycle, cell division in stimulated CD4 T cells, plasma cells	Cell cycle, cell division in stimulated CD4 T cells, Tgd cells, plasma cells, MHC-II signaling
LI.M4.11.split1	mitotic cell cycle in stimulated CD4 T cells	5	3	SLED5.3	Cell cycle, cell division in stimulated CD4 T cells, plasma cells	Cell cycle, cell division in stimulated CD4 T cells, Tgd cells, plasma cells, MHC-II signaling
LI.M6.split2	mitotic cell division	5	3	SLED5.3	Cell cycle, cell division in stimulated CD4 T cells, plasma cells	Cell cycle, cell division in stimulated CD4 T cells, Tgd cells, plasma cells, MHC-II signaling
LI.M6.split3	mitotic cell division	5	3	SLED5.3	Cell cycle, cell division in stimulated CD4 T cells, plasma cells	Cell cycle, cell division in stimulated CD4 T cells, Tgd cells, plasma cells, MHC-II signaling
LI.M8.split1	E2F transcription factor network	5	3	SLED5.3	Cell cycle, cell division in stimulated CD4 T cells, plasma cells	Cell cycle, cell division in stimulated CD4 T cells, Tgd cells, plasma cells, MHC-II signaling
LI.M10.0.split4	E2F1 targets (Q3)	5	3	SLED5.3	Cell cycle, cell division in stimulated CD4 T cells, plasma cells	Cell cycle, cell division in stimulated CD4 T cells, Tgd cells, plasma cells, MHC-II signaling
LI.M10.1.split1	E2F1 targets (Q4)	5	3	SLED5.3	Cell cycle, cell division in stimulated CD4 T cells, plasma cells	Cell cycle, cell division in stimulated CD4 T cells, Tgd cells, plasma cells, MHC-II signaling
LI.M46.split4	cell division stimulated CD4+ T cells	5	3	SLED5.3	Cell cycle, cell division in stimulated CD4 T cells, plasma cells	Cell cycle, cell division in stimulated CD4 T cells, Tgd cells, plasma cells, MHC-II signaling
DC.M3.3.split3	Cell Cycle	5	3	SLED5.3	Cell cycle, cell division in stimulated CD4 T cells, plasma cells	Cell cycle, cell division in stimulated CD4 T cells, Tgd cells, plasma cells, MHC-II signaling
DC.M6.11.split1	Cell Cycle	5	3	SLED5.3	Cell cycle, cell division in stimulated CD4 T cells, plasma cells	Cell cycle, cell division in stimulated CD4 T cells, Tgd cells, plasma cells, MHC-II signaling
DC.M6.11.split3	Cell Cycle	5	3	SLED5.3	Cell cycle, cell division in stimulated CD4 T cells, plasma cells	Cell cycle, cell division in stimulated CD4 T cells, Tgd cells, plasma cells, MHC-II signaling
DC.M6.16.split1	Cell Cycle	5	3	SLED5.3	Cell cycle, cell division in stimulated CD4 T cells, plasma cells	Cell cycle, cell division in stimulated CD4 T cells, Tgd cells, plasma cells, MHC-II signaling
GO:0000079.split2	regulation of cyclin-dependent protein serine/threonine kinase activity	5	3	SLED5.3	Cell cycle, cell division in stimulated CD4 T cells, plasma cells	Cell cycle, cell division in stimulated CD4 T cells, Tgd cells, plasma cells, MHC-II signaling
GO:0000086.split3	G2/M transition of mitotic cell cycle	5	3	SLED5.3	Cell cycle, cell division in stimulated CD4 T cells, plasma cells	Cell cycle, cell division in stimulated CD4 T cells, Tgd cells, plasma cells, MHC-II signaling
GO:0000226.split9	microtubule cytoskeleton organization	5	3	SLED5.3	Cell cycle, cell division in stimulated CD4 T cells, plasma cells	Cell cycle, cell division in stimulated CD4 T cells, Tgd cells, plasma cells, MHC-II signaling
GO:0000278.split3	mitotic cell cycle	5	3	SLED5.3	Cell cycle, cell division in stimulated CD4 T cells, plasma cells	Cell cycle, cell division in stimulated CD4 T cells, Tgd cells, plasma cells, MHC-II signaling
GO:0000281.split1	mitotic cytokinesis	5	3	SLED5.3	Cell cycle, cell division in stimulated CD4 T cells, plasma cells	Cell cycle, cell division in stimulated CD4 T cells, Tgd cells, plasma cells, MHC-II signaling
GO:0006260.split2	DNA replication	5	3	SLED5.3	Cell cycle, cell division in stimulated CD4 T cells, plasma cells	Cell cycle, cell division in stimulated CD4 T cells, Tgd cells, plasma cells, MHC-II signaling
GO:0006270.split2	DNA replication initiation	5	3	SLED5.3	Cell cycle, cell division in stimulated CD4 T cells, plasma cells	Cell cycle, cell division in stimulated CD4 T cells, Tgd cells, plasma cells, MHC-II signaling
GO:0007018.split4	microtubule-based movement	5	3	SLED5.3	Cell cycle, cell division in stimulated CD4 T cells, plasma cells	Cell cycle, cell division in stimulated CD4 T cells, Tgd cells, plasma cells, MHC-II signaling
GO:0007051.split2	spindle organization	5	3	SLED5.3	Cell cycle, cell division in stimulated CD4 T cells, plasma cells	Cell cycle, cell division in stimulated CD4 T cells, Tgd cells, plasma cells, MHC-II signaling
GO:0007052.split2	mitotic spindle organization	5	3	SLED5.3	Cell cycle, cell division in stimulated CD4 T cells, plasma cells	Cell cycle, cell division in stimulated CD4 T cells, Tgd cells, plasma cells, MHC-II signaling
GO:0007057	spindle assembly involved in female meiosis I	5	3	SLED5.3	Cell cycle, cell division in stimulated CD4 T cells, plasma cells	Cell cycle, cell division in stimulated CD4 T cells, Tgd cells, plasma cells, MHC-II signaling
GO:0007059.split2	chromosome segregation	5	3	SLED5.3	Cell cycle, cell division in stimulated CD4 T cells, plasma cells	Cell cycle, cell division in stimulated CD4 T cells, Tgd cells, plasma cells, MHC-II signaling
GO:0007076.split1	mitotic chromosome condensation	5	3	SLED5.3	Cell cycle, cell division in stimulated CD4 T cells, plasma cells	Cell cycle, cell division in stimulated CD4 T cells, Tgd cells, plasma cells, MHC-II signaling
GO:0007094.split1	mitotic spindle assembly checkpoint signaling	5	3	SLED5.3	Cell cycle, cell division in stimulated CD4 T cells, plasma cells	Cell cycle, cell division in stimulated CD4 T cells, Tgd cells, plasma cells, MHC-II signaling
GO:0008283.split4	cell population proliferation	5	3	SLED5.3	Cell cycle, cell division in stimulated CD4 T cells, plasma cells	Cell cycle, cell division in stimulated CD4 T cells, Tgd cells, plasma cells, MHC-II signaling
GO:0032465.split2	regulation of cytokinesis	5	3	SLED5.3	Cell cycle, cell division in stimulated CD4 T cells, plasma cells	Cell cycle, cell division in stimulated CD4 T cells, Tgd cells, plasma cells, MHC-II signaling
GO:0045184.split4	establishment of protein localization	5	3	SLED5.3	Cell cycle, cell division in stimulated CD4 T cells, plasma cells	Cell cycle, cell division in stimulated CD4 T cells, Tgd cells, plasma cells, MHC-II signaling
GO:0051310.split1	metaphase plate congression	5	3	SLED5.3	Cell cycle, cell division in stimulated CD4 T cells, plasma cells	Cell cycle, cell division in stimulated CD4 T cells, Tgd cells, plasma cells, MHC-II signaling
GO:0051321.split6	meiotic cell cycle	5	3	SLED5.3	Cell cycle, cell division in stimulated CD4 T cells, plasma cells	Cell cycle, cell division in stimulated CD4 T cells, Tgd cells, plasma cells, MHC-II signaling
GO:0051382.split2	kinetochore assembly	5	3	SLED5.3	Cell cycle, cell division in stimulated CD4 T cells, plasma cells	Cell cycle, cell division in stimulated CD4 T cells, Tgd cells, plasma cells, MHC-II signaling
GO:0051983.split1	regulation of chromosome segregation	5	3	SLED5.3	Cell cycle, cell division in stimulated CD4 T cells, plasma cells	Cell cycle, cell division in stimulated CD4 T cells, Tgd cells, plasma cells, MHC-II signaling
GO:0090307.split4	mitotic spindle assembly	5	3	SLED5.3	Cell cycle, cell division in stimulated CD4 T cells, plasma cells	Cell cycle, cell division in stimulated CD4 T cells, Tgd cells, plasma cells, MHC-II signaling
GO:0000228.split3	nuclear chromosome	5	3	SLED5.3	Cell cycle, cell division in stimulated CD4 T cells, plasma cells	Cell cycle, cell division in stimulated CD4 T cells, Tgd cells, plasma cells, MHC-II signaling
GO:0000307.split2	cyclin-dependent protein kinase holoenzyme complex	5	3	SLED5.3	Cell cycle, cell division in stimulated CD4 T cells, plasma cells	Cell cycle, cell division in stimulated CD4 T cells, Tgd cells, plasma cells, MHC-II signaling
GO:0000775.split3	chromosome, centromeric region	5	3	SLED5.3	Cell cycle, cell division in stimulated CD4 T cells, plasma cells	Cell cycle, cell division in stimulated CD4 T cells, Tgd cells, plasma cells, MHC-II signaling
GO:0000779.split1	condensed chromosome, centromeric region	5	3	SLED5.3	Cell cycle, cell division in stimulated CD4 T cells, plasma cells	Cell cycle, cell division in stimulated CD4 T cells, Tgd cells, plasma cells, MHC-II signaling
GO:0000794.split2	condensed nuclear chromosome	5	3	SLED5.3	Cell cycle, cell division in stimulated CD4 T cells, plasma cells	Cell cycle, cell division in stimulated CD4 T cells, Tgd cells, plasma cells, MHC-II signaling
GO:0000922.split1	spindle pole	5	3	SLED5.3	Cell cycle, cell division in stimulated CD4 T cells, plasma cells	Cell cycle, cell division in stimulated CD4 T cells, Tgd cells, plasma cells, MHC-II signaling
GO:0000940.split1	outer kinetochore	5	3	SLED5.3	Cell cycle, cell division in stimulated CD4 T cells, plasma cells	Cell cycle, cell division in stimulated CD4 T cells, Tgd cells, plasma cells, MHC-II signaling
GO:0005814.split2	centriole	5	3	SLED5.3	Cell cycle, cell division in stimulated CD4 T cells, plasma cells	Cell cycle, cell division in stimulated CD4 T cells, Tgd cells, plasma cells, MHC-II signaling
GO:0015630.split2	microtubule cytoskeleton	5	3	SLED5.3	Cell cycle, cell division in stimulated CD4 T cells, plasma cells	Cell cycle, cell division in stimulated CD4 T cells, Tgd cells, plasma cells, MHC-II signaling
GO:0030496.split2	midbody	5	3	SLED5.3	Cell cycle, cell division in stimulated CD4 T cells, plasma cells	Cell cycle, cell division in stimulated CD4 T cells, Tgd cells, plasma cells, MHC-II signaling
GO:0051233.split1	spindle midzone	5	3	SLED5.3	Cell cycle, cell division in stimulated CD4 T cells, plasma cells	Cell cycle, cell division in stimulated CD4 T cells, Tgd cells, plasma cells, MHC-II signaling
GO:0072686.split1	mitotic spindle	5	3	SLED5.3	Cell cycle, cell division in stimulated CD4 T cells, plasma cells	Cell cycle, cell division in stimulated CD4 T cells, Tgd cells, plasma cells, MHC-II signaling
GO:0097431.split1	mitotic spindle pole	5	3	SLED5.3	Cell cycle, cell division in stimulated CD4 T cells, plasma cells	Cell cycle, cell division in stimulated CD4 T cells, Tgd cells, plasma cells, MHC-II signaling
GO:0003697.split6	single-stranded DNA binding	5	3	SLED5.3	Cell cycle, cell division in stimulated CD4 T cells, plasma cells	Cell cycle, cell division in stimulated CD4 T cells, Tgd cells, plasma cells, MHC-II signaling
GO:0008017.split1	microtubule binding	5	3	SLED5.3	Cell cycle, cell division in stimulated CD4 T cells, plasma cells	Cell cycle, cell division in stimulated CD4 T cells, Tgd cells, plasma cells, MHC-II signaling
R-HSA-176187.split3	Activation of ATR in response to replication stress	5	3	SLED5.3	Cell cycle, cell division in stimulated CD4 T cells, plasma cells	Cell cycle, cell division in stimulated CD4 T cells, Tgd cells, plasma cells, MHC-II signaling
R-HSA-195258.split4	RHO GTPase Effectors	5	3	SLED5.3	Cell cycle, cell division in stimulated CD4 T cells, plasma cells	Cell cycle, cell division in stimulated CD4 T cells, Tgd cells, plasma cells, MHC-II signaling
R-HSA-2299718.split2	Condensation of Prophase Chromosomes	5	3	SLED5.3	Cell cycle, cell division in stimulated CD4 T cells, plasma cells	Cell cycle, cell division in stimulated CD4 T cells, Tgd cells, plasma cells, MHC-II signaling
R-HSA-2500257.split4	Resolution of Sister Chromatid Cohesion	5	3	SLED5.3	Cell cycle, cell division in stimulated CD4 T cells, plasma cells	Cell cycle, cell division in stimulated CD4 T cells, Tgd cells, plasma cells, MHC-II signaling
R-HSA-2565942.split3	Regulation of PLK1 Activity at G2/M Transition	5	3	SLED5.3	Cell cycle, cell division in stimulated CD4 T cells, plasma cells	Cell cycle, cell division in stimulated CD4 T cells, Tgd cells, plasma cells, MHC-II signaling
R-HSA-5663220.split3	RHO GTPases Activate Formins	5	3	SLED5.3	Cell cycle, cell division in stimulated CD4 T cells, plasma cells	Cell cycle, cell division in stimulated CD4 T cells, Tgd cells, plasma cells, MHC-II signaling
R-HSA-5693538.split2	Homology Directed Repair	5	3	SLED5.3	Cell cycle, cell division in stimulated CD4 T cells, plasma cells	Cell cycle, cell division in stimulated CD4 T cells, Tgd cells, plasma cells, MHC-II signaling
R-HSA-606279.split3	Deposition of new CENPA-containing nucleosomes at the centromere	5	3	SLED5.3	Cell cycle, cell division in stimulated CD4 T cells, plasma cells	Cell cycle, cell division in stimulated CD4 T cells, Tgd cells, plasma cells, MHC-II signaling
R-HSA-68877.split4	Mitotic Prometaphase	5	3	SLED5.3	Cell cycle, cell division in stimulated CD4 T cells, plasma cells	Cell cycle, cell division in stimulated CD4 T cells, Tgd cells, plasma cells, MHC-II signaling
R-HSA-68949.split5	Orc1 removal from chromatin	5	3	SLED5.3	Cell cycle, cell division in stimulated CD4 T cells, plasma cells	Cell cycle, cell division in stimulated CD4 T cells, Tgd cells, plasma cells, MHC-II signaling
R-HSA-69052.split5	Switching of origins to a post-replicative state	5	3	SLED5.3	Cell cycle, cell division in stimulated CD4 T cells, plasma cells	Cell cycle, cell division in stimulated CD4 T cells, Tgd cells, plasma cells, MHC-II signaling
R-HSA-69190.split4	DNA strand elongation	5	3	SLED5.3	Cell cycle, cell division in stimulated CD4 T cells, plasma cells	Cell cycle, cell division in stimulated CD4 T cells, Tgd cells, plasma cells, MHC-II signaling
R-HSA-69273.split2	Cyclin A/B1/B2 associated events during G2/M transition	5	3	SLED5.3	Cell cycle, cell division in stimulated CD4 T cells, plasma cells	Cell cycle, cell division in stimulated CD4 T cells, Tgd cells, plasma cells, MHC-II signaling
R-HSA-69275.split5	G2/M Transition	5	3	SLED5.3	Cell cycle, cell division in stimulated CD4 T cells, plasma cells	Cell cycle, cell division in stimulated CD4 T cells, Tgd cells, plasma cells, MHC-II signaling
R-HSA-69618.split1	Mitotic Spindle Checkpoint	5	3	SLED5.3	Cell cycle, cell division in stimulated CD4 T cells, plasma cells	Cell cycle, cell division in stimulated CD4 T cells, Tgd cells, plasma cells, MHC-II signaling
R-HSA-774815.split3	Nucleosome assembly	5	3	SLED5.3	Cell cycle, cell division in stimulated CD4 T cells, plasma cells	Cell cycle, cell division in stimulated CD4 T cells, Tgd cells, plasma cells, MHC-II signaling
R-HSA-8854518.split3	AURKA Activation by TPX2	5	3	SLED5.3	Cell cycle, cell division in stimulated CD4 T cells, plasma cells	Cell cycle, cell division in stimulated CD4 T cells, Tgd cells, plasma cells, MHC-II signaling
R-HSA-983231.split3	Factors involved in megakaryocyte development and platelet production	5	3	SLED5.3	Cell cycle, cell division in stimulated CD4 T cells, plasma cells	Cell cycle, cell division in stimulated CD4 T cells, Tgd cells, plasma cells, MHC-II signaling
hsa04110.split3	Cell cycle	5	3	SLED5.3	Cell cycle, cell division in stimulated CD4 T cells, plasma cells	Cell cycle, cell division in stimulated CD4 T cells, Tgd cells, plasma cells, MHC-II signaling
hsa04914.split6	Progesterone-mediated oocyte maturation	5	3	SLED5.3	Cell cycle, cell division in stimulated CD4 T cells, plasma cells	Cell cycle, cell division in stimulated CD4 T cells, Tgd cells, plasma cells, MHC-II signaling
WP2361.split3	Gastric cancer network 1	5	3	SLED5.3	Cell cycle, cell division in stimulated CD4 T cells, plasma cells	Cell cycle, cell division in stimulated CD4 T cells, Tgd cells, plasma cells, MHC-II signaling
WP4240.split1	Regulation of sister chromatid separation at the metaphase-anaphase transition	5	3	SLED5.3	Cell cycle, cell division in stimulated CD4 T cells, plasma cells	Cell cycle, cell division in stimulated CD4 T cells, Tgd cells, plasma cells, MHC-II signaling
WP45.split4	G1 to S cell cycle control	5	3	SLED5.3	Cell cycle, cell division in stimulated CD4 T cells, plasma cells	Cell cycle, cell division in stimulated CD4 T cells, Tgd cells, plasma cells, MHC-II signaling
WP466.split1	DNA replication	5	3	SLED5.3	Cell cycle, cell division in stimulated CD4 T cells, plasma cells	Cell cycle, cell division in stimulated CD4 T cells, Tgd cells, plasma cells, MHC-II signaling
WP707.split5	DNA damage response	5	3	SLED5.3	Cell cycle, cell division in stimulated CD4 T cells, plasma cells	Cell cycle, cell division in stimulated CD4 T cells, Tgd cells, plasma cells, MHC-II signaling
M13.32	Plasma cells	5	3	SLED5.3	Cell cycle, cell division in stimulated CD4 T cells, plasma cells	Cell cycle, cell division in stimulated CD4 T cells, Tgd cells, plasma cells, MHC-II signaling
Tgd_cells.split4	Tgd_cells	5	3	SLED5.3	Cell cycle, cell division in stimulated CD4 T cells, plasma cells	Cell cycle, cell division in stimulated CD4 T cells, Tgd cells, plasma cells, MHC-II signaling
LI.M4.2.split3	PLK1 signaling events	5	4	SLED5.4	Cell cycle, cell division in stimulated CD4 T cells, plasma cells	Cell cycle, cell division in stimulated CD4 T cells, plasma cells
LI.M4.5.split2	mitotic cell cycle in stimulated CD4 T cells	5	4	SLED5.4	Cell cycle, cell division in stimulated CD4 T cells, plasma cells	Cell cycle, cell division in stimulated CD4 T cells, plasma cells
LI.M4.7.split1	mitotic cell cycle	5	4	SLED5.4	Cell cycle, cell division in stimulated CD4 T cells, plasma cells	Cell cycle, cell division in stimulated CD4 T cells, plasma cells
LI.M4.10.split1	cell cycle (II)	5	4	SLED5.4	Cell cycle, cell division in stimulated CD4 T cells, plasma cells	Cell cycle, cell division in stimulated CD4 T cells, plasma cells
LI.M46.split2	cell division stimulated CD4+ T cells	5	4	SLED5.4	Cell cycle, cell division in stimulated CD4 T cells, plasma cells	Cell cycle, cell division in stimulated CD4 T cells, plasma cells
LI.M103.split2	cell cycle (III)	5	4	SLED5.4	Cell cycle, cell division in stimulated CD4 T cells, plasma cells	Cell cycle, cell division in stimulated CD4 T cells, plasma cells
GO:0007095.split2	mitotic G2 DNA damage checkpoint signaling	5	4	SLED5.4	Cell cycle, cell division in stimulated CD4 T cells, plasma cells	Cell cycle, cell division in stimulated CD4 T cells, plasma cells
GO:0019985.split2	translesion synthesis	5	4	SLED5.4	Cell cycle, cell division in stimulated CD4 T cells, plasma cells	Cell cycle, cell division in stimulated CD4 T cells, plasma cells
GO:0030261.split3	chromosome condensation	5	4	SLED5.4	Cell cycle, cell division in stimulated CD4 T cells, plasma cells	Cell cycle, cell division in stimulated CD4 T cells, plasma cells
GO:0071897.split5	DNA biosynthetic process	5	4	SLED5.4	Cell cycle, cell division in stimulated CD4 T cells, plasma cells	Cell cycle, cell division in stimulated CD4 T cells, plasma cells
GO:0045171.split5	intercellular bridge	5	4	SLED5.4	Cell cycle, cell division in stimulated CD4 T cells, plasma cells	Cell cycle, cell division in stimulated CD4 T cells, plasma cells
R-HSA-1362277.split2	Transcription of E2F targets under negative control by DREAM complex	5	4	SLED5.4	Cell cycle, cell division in stimulated CD4 T cells, plasma cells	Cell cycle, cell division in stimulated CD4 T cells, plasma cells
R-HSA-1538133.split2	G0 and Early G1	5	4	SLED5.4	Cell cycle, cell division in stimulated CD4 T cells, plasma cells	Cell cycle, cell division in stimulated CD4 T cells, plasma cells
R-HSA-162658.split1	Golgi Cisternae Pericentriolar Stack Reorganization	5	4	SLED5.4	Cell cycle, cell division in stimulated CD4 T cells, plasma cells	Cell cycle, cell division in stimulated CD4 T cells, plasma cells
R-HSA-6804116.split3	TP53 Regulates Transcription of Genes Involved in G1 Cell Cycle Arrest	5	4	SLED5.4	Cell cycle, cell division in stimulated CD4 T cells, plasma cells	Cell cycle, cell division in stimulated CD4 T cells, plasma cells
WP2525.split2	Trans-sulfuration and one-carbon metabolism	5	4	SLED5.4	Cell cycle, cell division in stimulated CD4 T cells, plasma cells	Cell cycle, cell division in stimulated CD4 T cells, plasma cells
M16.92.split4	Plasma cells	5	4	SLED5.4	Cell cycle, cell division in stimulated CD4 T cells, plasma cells	Cell cycle, cell division in stimulated CD4 T cells, plasma cells
LI.M4.6.split1	cell division in stimulated CD4 T cells	5	5	SLED5.5	Cell cycle, cell division in stimulated CD4 T cells, plasma cells	DNA replication and repair, cell division in stimulated CD4 T cells, plasma cells
DC.M9.1.split6	Undetermined	5	5	SLED5.5	Cell cycle, cell division in stimulated CD4 T cells, plasma cells	DNA replication and repair, cell division in stimulated CD4 T cells, plasma cells
DC.M9.32.split3	Undetermined	5	5	SLED5.5	Cell cycle, cell division in stimulated CD4 T cells, plasma cells	DNA replication and repair, cell division in stimulated CD4 T cells, plasma cells
GO:0000076.split1	DNA replication checkpoint signaling	5	5	SLED5.5	Cell cycle, cell division in stimulated CD4 T cells, plasma cells	DNA replication and repair, cell division in stimulated CD4 T cells, plasma cells
GO:0006265.split2	DNA topological change	5	5	SLED5.5	Cell cycle, cell division in stimulated CD4 T cells, plasma cells	DNA replication and repair, cell division in stimulated CD4 T cells, plasma cells
GO:0010569.split3	regulation of double-strand break repair via homologous recombination	5	5	SLED5.5	Cell cycle, cell division in stimulated CD4 T cells, plasma cells	DNA replication and repair, cell division in stimulated CD4 T cells, plasma cells
GO:0030071.split1	regulation of mitotic metaphase/anaphase transition	5	5	SLED5.5	Cell cycle, cell division in stimulated CD4 T cells, plasma cells	DNA replication and repair, cell division in stimulated CD4 T cells, plasma cells
GO:0032147.split5	activation of protein kinase activity	5	5	SLED5.5	Cell cycle, cell division in stimulated CD4 T cells, plasma cells	DNA replication and repair, cell division in stimulated CD4 T cells, plasma cells
GO:0032467.split2	positive regulation of cytokinesis	5	5	SLED5.5	Cell cycle, cell division in stimulated CD4 T cells, plasma cells	DNA replication and repair, cell division in stimulated CD4 T cells, plasma cells
GO:0000793.split2	condensed chromosome	5	5	SLED5.5	Cell cycle, cell division in stimulated CD4 T cells, plasma cells	DNA replication and repair, cell division in stimulated CD4 T cells, plasma cells
GO:0090543.split1	Flemming body	5	5	SLED5.5	Cell cycle, cell division in stimulated CD4 T cells, plasma cells	DNA replication and repair, cell division in stimulated CD4 T cells, plasma cells
R-HSA-380320.split4	Recruitment of NuMA to mitotic centrosomes	5	5	SLED5.5	Cell cycle, cell division in stimulated CD4 T cells, plasma cells	DNA replication and repair, cell division in stimulated CD4 T cells, plasma cells
R-HSA-73894.split9	DNA Repair	5	5	SLED5.5	Cell cycle, cell division in stimulated CD4 T cells, plasma cells	DNA replication and repair, cell division in stimulated CD4 T cells, plasma cells
R-HSA-9696273.split5	RND1 GTPase cycle	5	5	SLED5.5	Cell cycle, cell division in stimulated CD4 T cells, plasma cells	DNA replication and repair, cell division in stimulated CD4 T cells, plasma cells
M16.92.split1	Plasma cells	5	5	SLED5.5	Cell cycle, cell division in stimulated CD4 T cells, plasma cells	DNA replication and repair, cell division in stimulated CD4 T cells, plasma cells
LI.M4.9	mitotic cell cycle in stimulated CD4 T cells	5	6	SLED5.6	Cell cycle, cell division in stimulated CD4 T cells, plasma cells	Cell cycle, cell division in stimulated CD4 T cells, plasma cells, somatic hypermutation
LI.M4.14	Rho GTPase cycle	5	6	SLED5.6	Cell cycle, cell division in stimulated CD4 T cells, plasma cells	Cell cycle, cell division in stimulated CD4 T cells, plasma cells, somatic hypermutation
LI.M15	Ran mediated mitosis	5	6	SLED5.6	Cell cycle, cell division in stimulated CD4 T cells, plasma cells	Cell cycle, cell division in stimulated CD4 T cells, plasma cells, somatic hypermutation
DC.M7.7.split7	Undetermined	5	6	SLED5.6	Cell cycle, cell division in stimulated CD4 T cells, plasma cells	Cell cycle, cell division in stimulated CD4 T cells, plasma cells, somatic hypermutation
GO:0006275.split2	regulation of DNA replication	5	6	SLED5.6	Cell cycle, cell division in stimulated CD4 T cells, plasma cells	Cell cycle, cell division in stimulated CD4 T cells, plasma cells, somatic hypermutation
GO:0006281.split2	DNA repair	5	6	SLED5.6	Cell cycle, cell division in stimulated CD4 T cells, plasma cells	Cell cycle, cell division in stimulated CD4 T cells, plasma cells, somatic hypermutation
GO:0006284.split2	base-excision repair	5	6	SLED5.6	Cell cycle, cell division in stimulated CD4 T cells, plasma cells	Cell cycle, cell division in stimulated CD4 T cells, plasma cells, somatic hypermutation
GO:0016310.split7	phosphorylation	5	6	SLED5.6	Cell cycle, cell division in stimulated CD4 T cells, plasma cells	Cell cycle, cell division in stimulated CD4 T cells, plasma cells, somatic hypermutation
GO:0016446.split3	somatic hypermutation of immunoglobulin genes	5	6	SLED5.6	Cell cycle, cell division in stimulated CD4 T cells, plasma cells	Cell cycle, cell division in stimulated CD4 T cells, plasma cells, somatic hypermutation
GO:0036297.split2	interstrand cross-link repair	5	6	SLED5.6	Cell cycle, cell division in stimulated CD4 T cells, plasma cells	Cell cycle, cell division in stimulated CD4 T cells, plasma cells, somatic hypermutation
GO:0046602	regulation of mitotic centrosome separation	5	6	SLED5.6	Cell cycle, cell division in stimulated CD4 T cells, plasma cells	Cell cycle, cell division in stimulated CD4 T cells, plasma cells, somatic hypermutation
GO:0051298.split3	centrosome duplication	5	6	SLED5.6	Cell cycle, cell division in stimulated CD4 T cells, plasma cells	Cell cycle, cell division in stimulated CD4 T cells, plasma cells, somatic hypermutation
GO:0051383	kinetochore organization	5	6	SLED5.6	Cell cycle, cell division in stimulated CD4 T cells, plasma cells	Cell cycle, cell division in stimulated CD4 T cells, plasma cells, somatic hypermutation
GO:0051444.split2	negative regulation of ubiquitin-protein transferase activity	5	6	SLED5.6	Cell cycle, cell division in stimulated CD4 T cells, plasma cells	Cell cycle, cell division in stimulated CD4 T cells, plasma cells, somatic hypermutation
GO:0097421.split3	liver regeneration	5	6	SLED5.6	Cell cycle, cell division in stimulated CD4 T cells, plasma cells	Cell cycle, cell division in stimulated CD4 T cells, plasma cells, somatic hypermutation
GO:1905820	positive regulation of chromosome separation	5	6	SLED5.6	Cell cycle, cell division in stimulated CD4 T cells, plasma cells	Cell cycle, cell division in stimulated CD4 T cells, plasma cells, somatic hypermutation
GO:0005856.split12	cytoskeleton	5	6	SLED5.6	Cell cycle, cell division in stimulated CD4 T cells, plasma cells	Cell cycle, cell division in stimulated CD4 T cells, plasma cells, somatic hypermutation
GO:0031262	Ndc80 complex	5	6	SLED5.6	Cell cycle, cell division in stimulated CD4 T cells, plasma cells	Cell cycle, cell division in stimulated CD4 T cells, plasma cells, somatic hypermutation
GO:0097124	cyclin A2-CDK2 complex	5	6	SLED5.6	Cell cycle, cell division in stimulated CD4 T cells, plasma cells	Cell cycle, cell division in stimulated CD4 T cells, plasma cells, somatic hypermutation
GO:0003690.split7	double-stranded DNA binding	5	6	SLED5.6	Cell cycle, cell division in stimulated CD4 T cells, plasma cells	Cell cycle, cell division in stimulated CD4 T cells, plasma cells, somatic hypermutation
GO:0004672.split4	protein kinase activity	5	6	SLED5.6	Cell cycle, cell division in stimulated CD4 T cells, plasma cells	Cell cycle, cell division in stimulated CD4 T cells, plasma cells, somatic hypermutation
GO:0008574.split1	plus-end-directed microtubule motor activity	5	6	SLED5.6	Cell cycle, cell division in stimulated CD4 T cells, plasma cells	Cell cycle, cell division in stimulated CD4 T cells, plasma cells, somatic hypermutation
GO:0019904.split9	protein domain specific binding	5	6	SLED5.6	Cell cycle, cell division in stimulated CD4 T cells, plasma cells	Cell cycle, cell division in stimulated CD4 T cells, plasma cells, somatic hypermutation
GO:0106310.split2	protein serine kinase activity	5	6	SLED5.6	Cell cycle, cell division in stimulated CD4 T cells, plasma cells	Cell cycle, cell division in stimulated CD4 T cells, plasma cells, somatic hypermutation
R-HSA-194315.split5	Signaling by Rho GTPases	5	6	SLED5.6	Cell cycle, cell division in stimulated CD4 T cells, plasma cells	Cell cycle, cell division in stimulated CD4 T cells, plasma cells, somatic hypermutation
R-HSA-2980767	Activation of NIMA Kinases NEK9, NEK6, NEK7	5	6	SLED5.6	Cell cycle, cell division in stimulated CD4 T cells, plasma cells	Cell cycle, cell division in stimulated CD4 T cells, plasma cells, somatic hypermutation
R-HSA-380270.split3	Recruitment of mitotic centrosome proteins and complexes	5	6	SLED5.6	Cell cycle, cell division in stimulated CD4 T cells, plasma cells	Cell cycle, cell division in stimulated CD4 T cells, plasma cells, somatic hypermutation
R-HSA-5685939.split2	HDR through MMEJ (alt-NHEJ)	5	6	SLED5.6	Cell cycle, cell division in stimulated CD4 T cells, plasma cells	Cell cycle, cell division in stimulated CD4 T cells, plasma cells, somatic hypermutation
R-HSA-5685942.split4	HDR through Homologous Recombination (HRR)	5	6	SLED5.6	Cell cycle, cell division in stimulated CD4 T cells, plasma cells	Cell cycle, cell division in stimulated CD4 T cells, plasma cells, somatic hypermutation
R-HSA-5693532.split2	DNA Double-Strand Break Repair	5	6	SLED5.6	Cell cycle, cell division in stimulated CD4 T cells, plasma cells	Cell cycle, cell division in stimulated CD4 T cells, plasma cells, somatic hypermutation
R-HSA-5693537.split4	Resolution of D-Loop Structures	5	6	SLED5.6	Cell cycle, cell division in stimulated CD4 T cells, plasma cells	Cell cycle, cell division in stimulated CD4 T cells, plasma cells, somatic hypermutation
R-HSA-5693567.split4	HDR through Homologous Recombination (HRR) or Single Strand Annealing (SSA)	5	6	SLED5.6	Cell cycle, cell division in stimulated CD4 T cells, plasma cells	Cell cycle, cell division in stimulated CD4 T cells, plasma cells, somatic hypermutation
R-HSA-5693579.split4	Homologous DNA Pairing and Strand Exchange	5	6	SLED5.6	Cell cycle, cell division in stimulated CD4 T cells, plasma cells	Cell cycle, cell division in stimulated CD4 T cells, plasma cells, somatic hypermutation
R-HSA-5693607.split6	Processing of DNA double-strand break ends	5	6	SLED5.6	Cell cycle, cell division in stimulated CD4 T cells, plasma cells	Cell cycle, cell division in stimulated CD4 T cells, plasma cells, somatic hypermutation
R-HSA-5693616.split4	Presynaptic phase of homologous DNA pairing and strand exchange	5	6	SLED5.6	Cell cycle, cell division in stimulated CD4 T cells, plasma cells	Cell cycle, cell division in stimulated CD4 T cells, plasma cells, somatic hypermutation
R-HSA-6804756.split4	Regulation of TP53 Activity through Phosphorylation	5	6	SLED5.6	Cell cycle, cell division in stimulated CD4 T cells, plasma cells	Cell cycle, cell division in stimulated CD4 T cells, plasma cells, somatic hypermutation
R-HSA-6806003.split6	Regulation of TP53 Expression and Degradation	5	6	SLED5.6	Cell cycle, cell division in stimulated CD4 T cells, plasma cells	Cell cycle, cell division in stimulated CD4 T cells, plasma cells, somatic hypermutation
R-HSA-68911	G2 Phase	5	6	SLED5.6	Cell cycle, cell division in stimulated CD4 T cells, plasma cells	Cell cycle, cell division in stimulated CD4 T cells, plasma cells, somatic hypermutation
R-HSA-69202.split4	Cyclin E associated events during G1/S transition	5	6	SLED5.6	Cell cycle, cell division in stimulated CD4 T cells, plasma cells	Cell cycle, cell division in stimulated CD4 T cells, plasma cells, somatic hypermutation
R-HSA-69473.split4	G2/M DNA damage checkpoint	5	6	SLED5.6	Cell cycle, cell division in stimulated CD4 T cells, plasma cells	Cell cycle, cell division in stimulated CD4 T cells, plasma cells, somatic hypermutation
R-HSA-69481.split3	G2/M Checkpoints	5	6	SLED5.6	Cell cycle, cell division in stimulated CD4 T cells, plasma cells	Cell cycle, cell division in stimulated CD4 T cells, plasma cells, somatic hypermutation
hsa03320.split1	PPAR signaling pathway	5	6	SLED5.6	Cell cycle, cell division in stimulated CD4 T cells, plasma cells	Cell cycle, cell division in stimulated CD4 T cells, plasma cells, somatic hypermutation
hsa03410.split3	Base excision repair	5	6	SLED5.6	Cell cycle, cell division in stimulated CD4 T cells, plasma cells	Cell cycle, cell division in stimulated CD4 T cells, plasma cells, somatic hypermutation
WP3942.split6	PPAR signaling pathway	5	6	SLED5.6	Cell cycle, cell division in stimulated CD4 T cells, plasma cells	Cell cycle, cell division in stimulated CD4 T cells, plasma cells, somatic hypermutation
WP4946.split5	DNA repair pathways, full network	5	6	SLED5.6	Cell cycle, cell division in stimulated CD4 T cells, plasma cells	Cell cycle, cell division in stimulated CD4 T cells, plasma cells, somatic hypermutation
M16.32.split4	TBD	5	6	SLED5.6	Cell cycle, cell division in stimulated CD4 T cells, plasma cells	Cell cycle, cell division in stimulated CD4 T cells, plasma cells, somatic hypermutation
M16.60.split1	Plasma cells	5	6	SLED5.6	Cell cycle, cell division in stimulated CD4 T cells, plasma cells	Cell cycle, cell division in stimulated CD4 T cells, plasma cells, somatic hypermutation
LI.M4.3.split1	myeloid cell enriched receptors and transporters	6	1	SLED6.1	Monocytes, low-density lipoprotein particle invovled activity	Monocytes, chemokine production
LI.M4.15.split2	enriched in monocytes (I)	6	1	SLED6.1	Monocytes, low-density lipoprotein particle invovled activity	Monocytes, chemokine production
LI.M56.split2	suppression of MAPK signaling	6	1	SLED6.1	Monocytes, low-density lipoprotein particle invovled activity	Monocytes, chemokine production
LI.M66.split2	TBA	6	1	SLED6.1	Monocytes, low-density lipoprotein particle invovled activity	Monocytes, chemokine production
DC.M4.14.split1	Monocytes	6	1	SLED6.1	Monocytes, low-density lipoprotein particle invovled activity	Monocytes, chemokine production
GO:0006900.split1	vesicle budding from membrane	6	1	SLED6.1	Monocytes, low-density lipoprotein particle invovled activity	Monocytes, chemokine production
GO:0032722.split2	positive regulation of chemokine production	6	1	SLED6.1	Monocytes, low-density lipoprotein particle invovled activity	Monocytes, chemokine production
GO:0045429.split5	positive regulation of nitric oxide biosynthetic process	6	1	SLED6.1	Monocytes, low-density lipoprotein particle invovled activity	Monocytes, chemokine production
GO:0045664.split1	regulation of neuron differentiation	6	1	SLED6.1	Monocytes, low-density lipoprotein particle invovled activity	Monocytes, chemokine production
GO:0046185	aldehyde catabolic process	6	1	SLED6.1	Monocytes, low-density lipoprotein particle invovled activity	Monocytes, chemokine production
GO:0051453.split1	regulation of intracellular pH	6	1	SLED6.1	Monocytes, low-density lipoprotein particle invovled activity	Monocytes, chemokine production
GO:0060079.split4	excitatory postsynaptic potential	6	1	SLED6.1	Monocytes, low-density lipoprotein particle invovled activity	Monocytes, chemokine production
GO:1903238.split2	positive regulation of leukocyte tethering or rolling	6	1	SLED6.1	Monocytes, low-density lipoprotein particle invovled activity	Monocytes, chemokine production
GO:0004029.split1	aldehyde dehydrogenase (NAD+) activity	6	1	SLED6.1	Monocytes, low-density lipoprotein particle invovled activity	Monocytes, chemokine production
R-HSA-418555.split12	G alpha (s) signalling events	6	1	SLED6.1	Monocytes, low-density lipoprotein particle invovled activity	Monocytes, chemokine production
R-HSA-8964038.split4	LDL clearance	6	1	SLED6.1	Monocytes, low-density lipoprotein particle invovled activity	Monocytes, chemokine production
WP3612.split1	Photodynamic therapy-induced NFE2L2 (NRF2) survival signaling	6	1	SLED6.1	Monocytes, low-density lipoprotein particle invovled activity	Monocytes, chemokine production
WP465.split2	Tryptophan metabolism	6	1	SLED6.1	Monocytes, low-density lipoprotein particle invovled activity	Monocytes, chemokine production
M12.2.split1	Monocytes	6	1	SLED6.1	Monocytes, low-density lipoprotein particle invovled activity	Monocytes, chemokine production
LI.M66.split3	TBA	6	2	SLED6.2	Monocytes, low-density lipoprotein particle invovled activity	Monocytes, DCs, low-density lipoprotein particle invovled activity
LI.M139.split1	lysosomal/endosomal proteins	6	2	SLED6.2	Monocytes, low-density lipoprotein particle invovled activity	Monocytes, DCs, low-density lipoprotein particle invovled activity
LI.M168.split3	enriched in dendritic cells	6	2	SLED6.2	Monocytes, low-density lipoprotein particle invovled activity	Monocytes, DCs, low-density lipoprotein particle invovled activity
DC.M4.14.split2	Monocytes	6	2	SLED6.2	Monocytes, low-density lipoprotein particle invovled activity	Monocytes, DCs, low-density lipoprotein particle invovled activity
DC.M6.6.split1	Apoptosis / Survival	6	2	SLED6.2	Monocytes, low-density lipoprotein particle invovled activity	Monocytes, DCs, low-density lipoprotein particle invovled activity
DC.M7.22.split3	Undetermined	6	2	SLED6.2	Monocytes, low-density lipoprotein particle invovled activity	Monocytes, DCs, low-density lipoprotein particle invovled activity
DC.M8.35.split1	Undetermined	6	2	SLED6.2	Monocytes, low-density lipoprotein particle invovled activity	Monocytes, DCs, low-density lipoprotein particle invovled activity
GO:0034383.split2	low-density lipoprotein particle clearance	6	2	SLED6.2	Monocytes, low-density lipoprotein particle invovled activity	Monocytes, DCs, low-density lipoprotein particle invovled activity
GO:0042102.split4	positive regulation of T cell proliferation	6	2	SLED6.2	Monocytes, low-density lipoprotein particle invovled activity	Monocytes, DCs, low-density lipoprotein particle invovled activity
GO:0045766.split3	positive regulation of angiogenesis	6	2	SLED6.2	Monocytes, low-density lipoprotein particle invovled activity	Monocytes, DCs, low-density lipoprotein particle invovled activity
GO:0051602.split1	response to electrical stimulus	6	2	SLED6.2	Monocytes, low-density lipoprotein particle invovled activity	Monocytes, DCs, low-density lipoprotein particle invovled activity
GO:0005581.split3	collagen trimer	6	2	SLED6.2	Monocytes, low-density lipoprotein particle invovled activity	Monocytes, DCs, low-density lipoprotein particle invovled activity
GO:0005604.split1	basement membrane	6	2	SLED6.2	Monocytes, low-density lipoprotein particle invovled activity	Monocytes, DCs, low-density lipoprotein particle invovled activity
GO:0002020.split7	protease binding	6	2	SLED6.2	Monocytes, low-density lipoprotein particle invovled activity	Monocytes, DCs, low-density lipoprotein particle invovled activity
GO:0005041.split2	low-density lipoprotein particle receptor activity	6	2	SLED6.2	Monocytes, low-density lipoprotein particle invovled activity	Monocytes, DCs, low-density lipoprotein particle invovled activity
GO:0016798.split7	hydrolase activity, acting on glycosyl bonds	6	2	SLED6.2	Monocytes, low-density lipoprotein particle invovled activity	Monocytes, DCs, low-density lipoprotein particle invovled activity
GO:0016936.split2	galactoside binding	6	2	SLED6.2	Monocytes, low-density lipoprotein particle invovled activity	Monocytes, DCs, low-density lipoprotein particle invovled activity
GO:0030169.split2	low-density lipoprotein particle binding	6	2	SLED6.2	Monocytes, low-density lipoprotein particle invovled activity	Monocytes, DCs, low-density lipoprotein particle invovled activity
GO:0030246.split12	carbohydrate binding	6	2	SLED6.2	Monocytes, low-density lipoprotein particle invovled activity	Monocytes, DCs, low-density lipoprotein particle invovled activity
R-HSA-975138.split5	TRAF6 mediated induction of NFkB and MAP kinases upon TLR7/8 or 9 activation	6	2	SLED6.2	Monocytes, low-density lipoprotein particle invovled activity	Monocytes, DCs, low-density lipoprotein particle invovled activity
WP98.split6	Prostaglandin synthesis and regulation	6	2	SLED6.2	Monocytes, low-density lipoprotein particle invovled activity	Monocytes, DCs, low-density lipoprotein particle invovled activity
DC.M7.22.split4	Undetermined	6	3	SLED6.3	Monocytes, low-density lipoprotein particle invovled activity	DN3 B cells, neutrophil activation, glycosaminoglycan metabolism
GO:0002265	astrocyte activation involved in immune response	6	3	SLED6.3	Monocytes, low-density lipoprotein particle invovled activity	DN3 B cells, neutrophil activation, glycosaminoglycan metabolism
GO:0006027.split3	glycosaminoglycan catabolic process	6	3	SLED6.3	Monocytes, low-density lipoprotein particle invovled activity	DN3 B cells, neutrophil activation, glycosaminoglycan metabolism
GO:0006099.split3	tricarboxylic acid cycle	6	3	SLED6.3	Monocytes, low-density lipoprotein particle invovled activity	DN3 B cells, neutrophil activation, glycosaminoglycan metabolism
GO:0019369.split1	arachidonic acid metabolic process	6	3	SLED6.3	Monocytes, low-density lipoprotein particle invovled activity	DN3 B cells, neutrophil activation, glycosaminoglycan metabolism
GO:0021697	cerebellar cortex formation	6	3	SLED6.3	Monocytes, low-density lipoprotein particle invovled activity	DN3 B cells, neutrophil activation, glycosaminoglycan metabolism
GO:0042119.split3	neutrophil activation	6	3	SLED6.3	Monocytes, low-density lipoprotein particle invovled activity	DN3 B cells, neutrophil activation, glycosaminoglycan metabolism
GO:0050807.split2	regulation of synapse organization	6	3	SLED6.3	Monocytes, low-density lipoprotein particle invovled activity	DN3 B cells, neutrophil activation, glycosaminoglycan metabolism
GO:1904154	positive regulation of retrograde protein transport, ER to cytosol	6	3	SLED6.3	Monocytes, low-density lipoprotein particle invovled activity	DN3 B cells, neutrophil activation, glycosaminoglycan metabolism
GO:0005740.split3	mitochondrial envelope	6	3	SLED6.3	Monocytes, low-density lipoprotein particle invovled activity	DN3 B cells, neutrophil activation, glycosaminoglycan metabolism
GO:0005782.split7	peroxisomal matrix	6	3	SLED6.3	Monocytes, low-density lipoprotein particle invovled activity	DN3 B cells, neutrophil activation, glycosaminoglycan metabolism
GO:0005790.split3	smooth endoplasmic reticulum	6	3	SLED6.3	Monocytes, low-density lipoprotein particle invovled activity	DN3 B cells, neutrophil activation, glycosaminoglycan metabolism
GO:0030286.split2	dynein complex	6	3	SLED6.3	Monocytes, low-density lipoprotein particle invovled activity	DN3 B cells, neutrophil activation, glycosaminoglycan metabolism
GO:0030663.split2	COPI-coated vesicle membrane	6	3	SLED6.3	Monocytes, low-density lipoprotein particle invovled activity	DN3 B cells, neutrophil activation, glycosaminoglycan metabolism
GO:0031966.split8	mitochondrial membrane	6	3	SLED6.3	Monocytes, low-density lipoprotein particle invovled activity	DN3 B cells, neutrophil activation, glycosaminoglycan metabolism
GO:0008201.split10	heparin binding	6	3	SLED6.3	Monocytes, low-density lipoprotein particle invovled activity	DN3 B cells, neutrophil activation, glycosaminoglycan metabolism
R-HSA-157858.split1	Gap junction trafficking and regulation	6	3	SLED6.3	Monocytes, low-density lipoprotein particle invovled activity	DN3 B cells, neutrophil activation, glycosaminoglycan metabolism
R-HSA-1630316.split4	Glycosaminoglycan metabolism	6	3	SLED6.3	Monocytes, low-density lipoprotein particle invovled activity	DN3 B cells, neutrophil activation, glycosaminoglycan metabolism
R-HSA-169911.split3	Regulation of Apoptosis	6	3	SLED6.3	Monocytes, low-density lipoprotein particle invovled activity	DN3 B cells, neutrophil activation, glycosaminoglycan metabolism
R-HSA-71403.split2	Citric acid cycle (TCA cycle)	6	3	SLED6.3	Monocytes, low-density lipoprotein particle invovled activity	DN3 B cells, neutrophil activation, glycosaminoglycan metabolism
R-HSA-75205.split1	Dissolution of Fibrin Clot	6	3	SLED6.3	Monocytes, low-density lipoprotein particle invovled activity	DN3 B cells, neutrophil activation, glycosaminoglycan metabolism
R-HSA-8878159.split4	Transcriptional regulation by RUNX3	6	3	SLED6.3	Monocytes, low-density lipoprotein particle invovled activity	DN3 B cells, neutrophil activation, glycosaminoglycan metabolism
R-HSA-9646399.split1	Aggrephagy	6	3	SLED6.3	Monocytes, low-density lipoprotein particle invovled activity	DN3 B cells, neutrophil activation, glycosaminoglycan metabolism
hsa00480.split1	Glutathione metabolism	6	3	SLED6.3	Monocytes, low-density lipoprotein particle invovled activity	DN3 B cells, neutrophil activation, glycosaminoglycan metabolism
hsa00531.split1	Glycosaminoglycan degradation	6	3	SLED6.3	Monocytes, low-density lipoprotein particle invovled activity	DN3 B cells, neutrophil activation, glycosaminoglycan metabolism
WP4018.split2	Clear cell renal cell carcinoma pathways	6	3	SLED6.3	Monocytes, low-density lipoprotein particle invovled activity	DN3 B cells, neutrophil activation, glycosaminoglycan metabolism
WP408.split1	Oxidative stress response	6	3	SLED6.3	Monocytes, low-density lipoprotein particle invovled activity	DN3 B cells, neutrophil activation, glycosaminoglycan metabolism
M13.11.split4	TBD	6	3	SLED6.3	Monocytes, low-density lipoprotein particle invovled activity	DN3 B cells, neutrophil activation, glycosaminoglycan metabolism
M14.18.split3	TBD	6	3	SLED6.3	Monocytes, low-density lipoprotein particle invovled activity	DN3 B cells, neutrophil activation, glycosaminoglycan metabolism
B_cells_DN3	B_cells_DN3	6	3	SLED6.3	Monocytes, low-density lipoprotein particle invovled activity	DN3 B cells, neutrophil activation, glycosaminoglycan metabolism
LI.M4.4.split3	mitotic cell cycle - DNA replication	7	1	SLED7.1	Plasma cells, B cells, immunoglobulin production, DNA replication and repair, cell cycle	Cell cycle, DNA replication and repair, Th2 cells
DC.M6.16.split4	Cell Cycle	7	1	SLED7.1	Plasma cells, B cells, immunoglobulin production, DNA replication and repair, cell cycle	Cell cycle, DNA replication and repair, Th2 cells
DC.M7.7.split3	Undetermined	7	1	SLED7.1	Plasma cells, B cells, immunoglobulin production, DNA replication and repair, cell cycle	Cell cycle, DNA replication and repair, Th2 cells
GO:0000077.split5	DNA damage checkpoint signaling	7	1	SLED7.1	Plasma cells, B cells, immunoglobulin production, DNA replication and repair, cell cycle	Cell cycle, DNA replication and repair, Th2 cells
GO:0006259.split2	DNA metabolic process	7	1	SLED7.1	Plasma cells, B cells, immunoglobulin production, DNA replication and repair, cell cycle	Cell cycle, DNA replication and repair, Th2 cells
GO:0006306.split3	DNA methylation	7	1	SLED7.1	Plasma cells, B cells, immunoglobulin production, DNA replication and repair, cell cycle	Cell cycle, DNA replication and repair, Th2 cells
GO:0043111	replication fork arrest	7	1	SLED7.1	Plasma cells, B cells, immunoglobulin production, DNA replication and repair, cell cycle	Cell cycle, DNA replication and repair, Th2 cells
GO:0046601	positive regulation of centriole replication	7	1	SLED7.1	Plasma cells, B cells, immunoglobulin production, DNA replication and repair, cell cycle	Cell cycle, DNA replication and repair, Th2 cells
GO:0048478.split2	replication fork protection	7	1	SLED7.1	Plasma cells, B cells, immunoglobulin production, DNA replication and repair, cell cycle	Cell cycle, DNA replication and repair, Th2 cells
GO:0051754	meiotic sister chromatid cohesion, centromeric	7	1	SLED7.1	Plasma cells, B cells, immunoglobulin production, DNA replication and repair, cell cycle	Cell cycle, DNA replication and repair, Th2 cells
GO:0033597	mitotic checkpoint complex	7	1	SLED7.1	Plasma cells, B cells, immunoglobulin production, DNA replication and repair, cell cycle	Cell cycle, DNA replication and repair, Th2 cells
GO:0004488	methylenetetrahydrofolate dehydrogenase (NADP+) activity	7	1	SLED7.1	Plasma cells, B cells, immunoglobulin production, DNA replication and repair, cell cycle	Cell cycle, DNA replication and repair, Th2 cells
GO:0008409.split1	5'-3' exonuclease activity	7	1	SLED7.1	Plasma cells, B cells, immunoglobulin production, DNA replication and repair, cell cycle	Cell cycle, DNA replication and repair, Th2 cells
R-HSA-2468052.split2	Establishment of Sister Chromatid Cohesion	7	1	SLED7.1	Plasma cells, B cells, immunoglobulin production, DNA replication and repair, cell cycle	Cell cycle, DNA replication and repair, Th2 cells
R-HSA-69200	Phosphorylation of proteins involved in G1/S transition by active Cyclin E:Cdk2 complexes	7	1	SLED7.1	Plasma cells, B cells, immunoglobulin production, DNA replication and repair, cell cycle	Cell cycle, DNA replication and repair, Th2 cells
Th2_cells.split2	Th2_cells	7	1	SLED7.1	Plasma cells, B cells, immunoglobulin production, DNA replication and repair, cell cycle	Cell cycle, DNA replication and repair, Th2 cells
LI.M10.0.split2	E2F1 targets (Q3)	7	2	SLED7.2	Plasma cells, B cells, immunoglobulin production, DNA replication and repair, cell cycle	DNA replication and repair
LI.M22.0.split3	mismatch repair (I)	7	2	SLED7.2	Plasma cells, B cells, immunoglobulin production, DNA replication and repair, cell cycle	DNA replication and repair
LI.M76.split1	DNA repair	7	2	SLED7.2	Plasma cells, B cells, immunoglobulin production, DNA replication and repair, cell cycle	DNA replication and repair
GO:0006260.split4	DNA replication	7	2	SLED7.2	Plasma cells, B cells, immunoglobulin production, DNA replication and repair, cell cycle	DNA replication and repair
GO:0032508.split2	DNA duplex unwinding	7	2	SLED7.2	Plasma cells, B cells, immunoglobulin production, DNA replication and repair, cell cycle	DNA replication and repair
GO:0042127.split6	regulation of cell population proliferation	7	2	SLED7.2	Plasma cells, B cells, immunoglobulin production, DNA replication and repair, cell cycle	DNA replication and repair
GO:0043137	DNA replication, removal of RNA primer	7	2	SLED7.2	Plasma cells, B cells, immunoglobulin production, DNA replication and repair, cell cycle	DNA replication and repair
R-HSA-110314.split2	Recognition of DNA damage by PCNA-containing replication complex	7	2	SLED7.2	Plasma cells, B cells, immunoglobulin production, DNA replication and repair, cell cycle	DNA replication and repair
R-HSA-157579.split4	Telomere Maintenance	7	2	SLED7.2	Plasma cells, B cells, immunoglobulin production, DNA replication and repair, cell cycle	DNA replication and repair
R-HSA-174417.split2	Telomere C-strand (Lagging Strand) Synthesis	7	2	SLED7.2	Plasma cells, B cells, immunoglobulin production, DNA replication and repair, cell cycle	DNA replication and repair
R-HSA-180786.split2	Extension of Telomeres	7	2	SLED7.2	Plasma cells, B cells, immunoglobulin production, DNA replication and repair, cell cycle	DNA replication and repair
R-HSA-5358508.split2	Mismatch Repair	7	2	SLED7.2	Plasma cells, B cells, immunoglobulin production, DNA replication and repair, cell cycle	DNA replication and repair
R-HSA-69166.split2	Removal of the Flap Intermediate	7	2	SLED7.2	Plasma cells, B cells, immunoglobulin production, DNA replication and repair, cell cycle	DNA replication and repair
R-HSA-73884.split3	Base Excision Repair	7	2	SLED7.2	Plasma cells, B cells, immunoglobulin production, DNA replication and repair, cell cycle	DNA replication and repair
hsa03030.split2	DNA replication	7	2	SLED7.2	Plasma cells, B cells, immunoglobulin production, DNA replication and repair, cell cycle	DNA replication and repair
WP45.split1	G1 to S cell cycle control	7	2	SLED7.2	Plasma cells, B cells, immunoglobulin production, DNA replication and repair, cell cycle	DNA replication and repair
LI.M47.1.split1	enriched in B cells (II)	7	3	SLED7.3	Plasma cells, B cells, immunoglobulin production, DNA replication and repair, cell cycle	B cells, DN1 B cells, memory B cells, plasma cells
LI.M47.2.split1	enriched in B cells (III)	7	3	SLED7.3	Plasma cells, B cells, immunoglobulin production, DNA replication and repair, cell cycle	B cells, DN1 B cells, memory B cells, plasma cells
LI.M156.1.split2	plasma cells, immunoglobulins	7	3	SLED7.3	Plasma cells, B cells, immunoglobulin production, DNA replication and repair, cell cycle	B cells, DN1 B cells, memory B cells, plasma cells
LI.S9.split2	Memory B cell surface signature	7	3	SLED7.3	Plasma cells, B cells, immunoglobulin production, DNA replication and repair, cell cycle	B cells, DN1 B cells, memory B cells, plasma cells
DC.M7.32.split1	Undetermined	7	3	SLED7.3	Plasma cells, B cells, immunoglobulin production, DNA replication and repair, cell cycle	B cells, DN1 B cells, memory B cells, plasma cells
B_cells_DN1	B_cells_DN1	7	3	SLED7.3	Plasma cells, B cells, immunoglobulin production, DNA replication and repair, cell cycle	B cells, DN1 B cells, memory B cells, plasma cells
LI.M156.0.split2	plasma cells & B cells, immunoglobulins	7	4	SLED7.4	Plasma cells, B cells, immunoglobulin production, DNA replication and repair, cell cycle	Plasma cells, immunoglobulin production, BCR, adaptive immune response
LI.M156.1.split1	plasma cells, immunoglobulins	7	4	SLED7.4	Plasma cells, B cells, immunoglobulin production, DNA replication and repair, cell cycle	Plasma cells, immunoglobulin production, BCR, adaptive immune response
DC.M4.11.split1	Plasma Cells	7	4	SLED7.4	Plasma cells, B cells, immunoglobulin production, DNA replication and repair, cell cycle	Plasma cells, immunoglobulin production, BCR, adaptive immune response
GO:0002250.split3	adaptive immune response	7	4	SLED7.4	Plasma cells, B cells, immunoglobulin production, DNA replication and repair, cell cycle	Plasma cells, immunoglobulin production, BCR, adaptive immune response
GO:0002377.split1	immunoglobulin production	7	4	SLED7.4	Plasma cells, B cells, immunoglobulin production, DNA replication and repair, cell cycle	Plasma cells, immunoglobulin production, BCR, adaptive immune response
GO:0003094.split1	glomerular filtration	7	4	SLED7.4	Plasma cells, B cells, immunoglobulin production, DNA replication and repair, cell cycle	Plasma cells, immunoglobulin production, BCR, adaptive immune response
GO:0006955.split6	immune response	7	4	SLED7.4	Plasma cells, B cells, immunoglobulin production, DNA replication and repair, cell cycle	Plasma cells, immunoglobulin production, BCR, adaptive immune response
GO:0019731.split1	antibacterial humoral response	7	4	SLED7.4	Plasma cells, B cells, immunoglobulin production, DNA replication and repair, cell cycle	Plasma cells, immunoglobulin production, BCR, adaptive immune response
GO:0050853.split2	B cell receptor signaling pathway	7	4	SLED7.4	Plasma cells, B cells, immunoglobulin production, DNA replication and repair, cell cycle	Plasma cells, immunoglobulin production, BCR, adaptive immune response
GO:0071751	secretory IgA immunoglobulin complex	7	4	SLED7.4	Plasma cells, B cells, immunoglobulin production, DNA replication and repair, cell cycle	Plasma cells, immunoglobulin production, BCR, adaptive immune response
GO:0072562.split6	blood microparticle	7	4	SLED7.4	Plasma cells, B cells, immunoglobulin production, DNA replication and repair, cell cycle	Plasma cells, immunoglobulin production, BCR, adaptive immune response
GO:0003823.split2	antigen binding	7	4	SLED7.4	Plasma cells, B cells, immunoglobulin production, DNA replication and repair, cell cycle	Plasma cells, immunoglobulin production, BCR, adaptive immune response
GO:0034987.split2	immunoglobulin receptor binding	7	4	SLED7.4	Plasma cells, B cells, immunoglobulin production, DNA replication and repair, cell cycle	Plasma cells, immunoglobulin production, BCR, adaptive immune response
DC.M7.7.split2	Undetermined	7	5	SLED7.5	Plasma cells, B cells, immunoglobulin production, DNA replication and repair, cell cycle	ER lumen, protein-disulfide reductase activity
GO:0005788.split9	endoplasmic reticulum lumen	7	5	SLED7.5	Plasma cells, B cells, immunoglobulin production, DNA replication and repair, cell cycle	ER lumen, protein-disulfide reductase activity
GO:0033018.split1	sarcoplasmic reticulum lumen	7	5	SLED7.5	Plasma cells, B cells, immunoglobulin production, DNA replication and repair, cell cycle	ER lumen, protein-disulfide reductase activity
GO:0015035.split2	protein-disulfide reductase activity	7	5	SLED7.5	Plasma cells, B cells, immunoglobulin production, DNA replication and repair, cell cycle	ER lumen, protein-disulfide reductase activity
M16.54.split4	TBD	7	5	SLED7.5	Plasma cells, B cells, immunoglobulin production, DNA replication and repair, cell cycle	ER lumen, protein-disulfide reductase activity
GO:0006231	dTMP biosynthetic process	7	6	SLED7.6	Plasma cells, B cells, immunoglobulin production, DNA replication and repair, cell cycle	IFN-I, Plasma cells, nucleotide metabolism
GO:0006287.split3	base-excision repair, gap-filling	7	6	SLED7.6	Plasma cells, B cells, immunoglobulin production, DNA replication and repair, cell cycle	IFN-I, Plasma cells, nucleotide metabolism
GO:0009185	ribonucleoside diphosphate metabolic process	7	6	SLED7.6	Plasma cells, B cells, immunoglobulin production, DNA replication and repair, cell cycle	IFN-I, Plasma cells, nucleotide metabolism
GO:0032355.split5	response to estradiol	7	6	SLED7.6	Plasma cells, B cells, immunoglobulin production, DNA replication and repair, cell cycle	IFN-I, Plasma cells, nucleotide metabolism
GO:1901363.split1	heterocyclic compound binding	7	6	SLED7.6	Plasma cells, B cells, immunoglobulin production, DNA replication and repair, cell cycle	IFN-I, Plasma cells, nucleotide metabolism
R-HSA-432720.split3	Lysosome Vesicle Biogenesis	7	6	SLED7.6	Plasma cells, B cells, immunoglobulin production, DNA replication and repair, cell cycle	IFN-I, Plasma cells, nucleotide metabolism
hsa01523.split2	Antifolate resistance	7	6	SLED7.6	Plasma cells, B cells, immunoglobulin production, DNA replication and repair, cell cycle	IFN-I, Plasma cells, nucleotide metabolism
WP4688	Serine metabolism	7	6	SLED7.6	Plasma cells, B cells, immunoglobulin production, DNA replication and repair, cell cycle	IFN-I, Plasma cells, nucleotide metabolism
IFN_I.split2	IFN_I	7	6	SLED7.6	Plasma cells, B cells, immunoglobulin production, DNA replication and repair, cell cycle	IFN-I, Plasma cells, nucleotide metabolism
M15.110.split2	Plasma cells	7	6	SLED7.6	Plasma cells, B cells, immunoglobulin production, DNA replication and repair, cell cycle	IFN-I, Plasma cells, nucleotide metabolism
GO:0007346.split1	regulation of mitotic cell cycle	7	7	SLED7.7	Plasma cells, B cells, immunoglobulin production, DNA replication and repair, cell cycle	DNA replication and repair, regulation of cell cycle
GO:0045737.split2	positive regulation of cyclin-dependent protein serine/threonine kinase activity	7	7	SLED7.7	Plasma cells, B cells, immunoglobulin production, DNA replication and repair, cell cycle	DNA replication and repair, regulation of cell cycle
GO:1902975	mitotic DNA replication initiation	7	7	SLED7.7	Plasma cells, B cells, immunoglobulin production, DNA replication and repair, cell cycle	DNA replication and repair, regulation of cell cycle
GO:1905448	positive regulation of mitochondrial ATP synthesis coupled electron transport	7	7	SLED7.7	Plasma cells, B cells, immunoglobulin production, DNA replication and repair, cell cycle	DNA replication and repair, regulation of cell cycle
GO:0042555.split1	MCM complex	7	7	SLED7.7	Plasma cells, B cells, immunoglobulin production, DNA replication and repair, cell cycle	DNA replication and repair, regulation of cell cycle
GO:0004869.split2	cysteine-type endopeptidase inhibitor activity	7	7	SLED7.7	Plasma cells, B cells, immunoglobulin production, DNA replication and repair, cell cycle	DNA replication and repair, regulation of cell cycle
GO:0043138.split3	3'-5' DNA helicase activity	7	7	SLED7.7	Plasma cells, B cells, immunoglobulin production, DNA replication and repair, cell cycle	DNA replication and repair, regulation of cell cycle
R-HSA-2514853	Condensation of Prometaphase Chromosomes	7	7	SLED7.7	Plasma cells, B cells, immunoglobulin production, DNA replication and repair, cell cycle	DNA replication and repair, regulation of cell cycle
R-HSA-6783310.split3	Fanconi Anemia Pathway	7	7	SLED7.7	Plasma cells, B cells, immunoglobulin production, DNA replication and repair, cell cycle	DNA replication and repair, regulation of cell cycle
R-HSA-73894.split8	DNA Repair	7	7	SLED7.7	Plasma cells, B cells, immunoglobulin production, DNA replication and repair, cell cycle	DNA replication and repair, regulation of cell cycle
LI.M4.8.split3	cell division - E2F transcription network	8	1	SLED8.1	Transcription, translation, IFN-II and -III	Transcription, spliceosome, fatty acid metabolism
DC.M7.24.split5	Undetermined	8	1	SLED8.1	Transcription, translation, IFN-II and -III	Transcription, spliceosome, fatty acid metabolism
GO:0000387.split4	spliceosomal snRNP assembly	8	1	SLED8.1	Transcription, translation, IFN-II and -III	Transcription, spliceosome, fatty acid metabolism
GO:1905168.split4	positive regulation of double-strand break repair via homologous recombination	8	1	SLED8.1	Transcription, translation, IFN-II and -III	Transcription, spliceosome, fatty acid metabolism
GO:0005847.split2	mRNA cleavage and polyadenylation specificity factor complex	8	1	SLED8.1	Transcription, translation, IFN-II and -III	Transcription, spliceosome, fatty acid metabolism
GO:0070545	PeBoW complex	8	1	SLED8.1	Transcription, translation, IFN-II and -III	Transcription, spliceosome, fatty acid metabolism
GO:0043139.split2	5'-3' DNA helicase activity	8	1	SLED8.1	Transcription, translation, IFN-II and -III	Transcription, spliceosome, fatty acid metabolism
R-HSA-1614558.split2	Degradation of cysteine and homocysteine	8	1	SLED8.1	Transcription, translation, IFN-II and -III	Transcription, spliceosome, fatty acid metabolism
R-HSA-196757.split2	Metabolism of folate and pterines	8	1	SLED8.1	Transcription, translation, IFN-II and -III	Transcription, spliceosome, fatty acid metabolism
R-HSA-499943.split1	Interconversion of nucleotide di- and triphosphates	8	1	SLED8.1	Transcription, translation, IFN-II and -III	Transcription, spliceosome, fatty acid metabolism
R-HSA-70263.split3	Gluconeogenesis	8	1	SLED8.1	Transcription, translation, IFN-II and -III	Transcription, spliceosome, fatty acid metabolism
R-HSA-75067.split4	Processing of Capped Intronless Pre-mRNA	8	1	SLED8.1	Transcription, translation, IFN-II and -III	Transcription, spliceosome, fatty acid metabolism
hsa01212.split7	Fatty acid metabolism	8	1	SLED8.1	Transcription, translation, IFN-II and -III	Transcription, spliceosome, fatty acid metabolism
M14.25.split1	TBD	8	1	SLED8.1	Transcription, translation, IFN-II and -III	Transcription, spliceosome, fatty acid metabolism
LI.M32.2.split2	CORO1A-DEF6 network (I)	8	2	SLED8.2	Transcription, translation, IFN-II and -III	Transcription, fructose, mannose, and branched-chain amino acid metabolism, CORO1A-DEF6 network
DC.M6.8.split4	Undetermined	8	2	SLED8.2	Transcription, translation, IFN-II and -III	Transcription, fructose, mannose, and branched-chain amino acid metabolism, CORO1A-DEF6 network
DC.M7.5.split4	Undetermined	8	2	SLED8.2	Transcription, translation, IFN-II and -III	Transcription, fructose, mannose, and branched-chain amino acid metabolism, CORO1A-DEF6 network
GO:0032021	NELF complex	8	2	SLED8.2	Transcription, translation, IFN-II and -III	Transcription, fructose, mannose, and branched-chain amino acid metabolism, CORO1A-DEF6 network
GO:0042645.split2	mitochondrial nucleoid	8	2	SLED8.2	Transcription, translation, IFN-II and -III	Transcription, fructose, mannose, and branched-chain amino acid metabolism, CORO1A-DEF6 network
R-HSA-167169.split4	HIV Transcription Elongation	8	2	SLED8.2	Transcription, translation, IFN-II and -III	Transcription, fructose, mannose, and branched-chain amino acid metabolism, CORO1A-DEF6 network
R-HSA-6782315.split4	tRNA modification in the nucleus and cytosol	8	2	SLED8.2	Transcription, translation, IFN-II and -III	Transcription, fructose, mannose, and branched-chain amino acid metabolism, CORO1A-DEF6 network
R-HSA-70895.split2	Branched-chain amino acid catabolism	8	2	SLED8.2	Transcription, translation, IFN-II and -III	Transcription, fructose, mannose, and branched-chain amino acid metabolism, CORO1A-DEF6 network
hsa00051.split1	Fructose and mannose metabolism	8	2	SLED8.2	Transcription, translation, IFN-II and -III	Transcription, fructose, mannose, and branched-chain amino acid metabolism, CORO1A-DEF6 network
M12.4.split2	Gene transcription	8	2	SLED8.2	Transcription, translation, IFN-II and -III	Transcription, fructose, mannose, and branched-chain amino acid metabolism, CORO1A-DEF6 network
LI.M234.split1	transcription elongation, RNA polymerase II	8	3	SLED8.3	Transcription, translation, IFN-II and -III	IFN-II and -III, transcription elongation, oxidative phophorylation, translation, steroid metabolism
DC.M6.2.split3	Mitochondrial Respiration	8	3	SLED8.3	Transcription, translation, IFN-II and -III	IFN-II and -III, transcription elongation, oxidative phophorylation, translation, steroid metabolism
DC.M8.53.split3	Undetermined	8	3	SLED8.3	Transcription, translation, IFN-II and -III	IFN-II and -III, transcription elongation, oxidative phophorylation, translation, steroid metabolism
GO:0008202.split7	steroid metabolic process	8	3	SLED8.3	Transcription, translation, IFN-II and -III	IFN-II and -III, transcription elongation, oxidative phophorylation, translation, steroid metabolism
GO:0032543.split3	mitochondrial translation	8	3	SLED8.3	Transcription, translation, IFN-II and -III	IFN-II and -III, transcription elongation, oxidative phophorylation, translation, steroid metabolism
GO:0005747.split3	mitochondrial respiratory chain complex I	8	3	SLED8.3	Transcription, translation, IFN-II and -III	IFN-II and -III, transcription elongation, oxidative phophorylation, translation, steroid metabolism
GO:0005750.split2	mitochondrial respiratory chain complex III	8	3	SLED8.3	Transcription, translation, IFN-II and -III	IFN-II and -III, transcription elongation, oxidative phophorylation, translation, steroid metabolism
GO:0005763.split2	mitochondrial small ribosomal subunit	8	3	SLED8.3	Transcription, translation, IFN-II and -III	IFN-II and -III, transcription elongation, oxidative phophorylation, translation, steroid metabolism
GO:0070469.split1	respirasome	8	3	SLED8.3	Transcription, translation, IFN-II and -III	IFN-II and -III, transcription elongation, oxidative phophorylation, translation, steroid metabolism
R-HSA-156581.split2	Methylation	8	3	SLED8.3	Transcription, translation, IFN-II and -III	IFN-II and -III, transcription elongation, oxidative phophorylation, translation, steroid metabolism
R-HSA-6799198.split4	Complex I biogenesis	8	3	SLED8.3	Transcription, translation, IFN-II and -III	IFN-II and -III, transcription elongation, oxidative phophorylation, translation, steroid metabolism
hsa05010.split3	Alzheimer disease	8	3	SLED8.3	Transcription, translation, IFN-II and -III	IFN-II and -III, transcription elongation, oxidative phophorylation, translation, steroid metabolism
WP3580.split1	Methionine de novo and salvage pathway	8	3	SLED8.3	Transcription, translation, IFN-II and -III	IFN-II and -III, transcription elongation, oxidative phophorylation, translation, steroid metabolism
WP4921.split1	Mitochondrial complex III assembly	8	3	SLED8.3	Transcription, translation, IFN-II and -III	IFN-II and -III, transcription elongation, oxidative phophorylation, translation, steroid metabolism
WP623.split2	Oxidative phosphorylation	8	3	SLED8.3	Transcription, translation, IFN-II and -III	IFN-II and -III, transcription elongation, oxidative phophorylation, translation, steroid metabolism
IFN_II_III.split4	IFN_II_III	8	3	SLED8.3	Transcription, translation, IFN-II and -III	IFN-II and -III, transcription elongation, oxidative phophorylation, translation, steroid metabolism
M14.30.split1	Oxidative phosphorylation	8	3	SLED8.3	Transcription, translation, IFN-II and -III	IFN-II and -III, transcription elongation, oxidative phophorylation, translation, steroid metabolism
DC.M5.10.split2	Mitochondrial Respiration	8	4	SLED8.4	Transcription, translation, IFN-II and -III	IFN-II and -III, transcription, translation, response to reactive oxygen species, purine and nucleotide metabolism
GO:0000302.split2	response to reactive oxygen species	8	4	SLED8.4	Transcription, translation, IFN-II and -III	IFN-II and -III, transcription, translation, response to reactive oxygen species, purine and nucleotide metabolism
GO:0006183.split1	GTP biosynthetic process	8	4	SLED8.4	Transcription, translation, IFN-II and -III	IFN-II and -III, transcription, translation, response to reactive oxygen species, purine and nucleotide metabolism
GO:0009117.split3	nucleotide metabolic process	8	4	SLED8.4	Transcription, translation, IFN-II and -III	IFN-II and -III, transcription, translation, response to reactive oxygen species, purine and nucleotide metabolism
GO:0090297	positive regulation of mitochondrial DNA replication	8	4	SLED8.4	Transcription, translation, IFN-II and -III	IFN-II and -III, transcription, translation, response to reactive oxygen species, purine and nucleotide metabolism
GO:0005758.split1	mitochondrial intermembrane space	8	4	SLED8.4	Transcription, translation, IFN-II and -III	IFN-II and -III, transcription, translation, response to reactive oxygen species, purine and nucleotide metabolism
GO:0005761.split1	mitochondrial ribosome	8	4	SLED8.4	Transcription, translation, IFN-II and -III	IFN-II and -III, transcription, translation, response to reactive oxygen species, purine and nucleotide metabolism
GO:0005762.split2	mitochondrial large ribosomal subunit	8	4	SLED8.4	Transcription, translation, IFN-II and -III	IFN-II and -III, transcription, translation, response to reactive oxygen species, purine and nucleotide metabolism
GO:0030684	preribosome	8	4	SLED8.4	Transcription, translation, IFN-II and -III	IFN-II and -III, transcription, translation, response to reactive oxygen species, purine and nucleotide metabolism
GO:0071005.split4	U2-type precatalytic spliceosome	8	4	SLED8.4	Transcription, translation, IFN-II and -III	IFN-II and -III, transcription, translation, response to reactive oxygen species, purine and nucleotide metabolism
GO:0071944.split2	cell periphery	8	4	SLED8.4	Transcription, translation, IFN-II and -III	IFN-II and -III, transcription, translation, response to reactive oxygen species, purine and nucleotide metabolism
GO:0097255	R2TP complex	8	4	SLED8.4	Transcription, translation, IFN-II and -III	IFN-II and -III, transcription, translation, response to reactive oxygen species, purine and nucleotide metabolism
GO:0097526	spliceosomal tri-snRNP complex	8	4	SLED8.4	Transcription, translation, IFN-II and -III	IFN-II and -III, transcription, translation, response to reactive oxygen species, purine and nucleotide metabolism
GO:0008276.split2	protein methyltransferase activity	8	4	SLED8.4	Transcription, translation, IFN-II and -III	IFN-II and -III, transcription, translation, response to reactive oxygen species, purine and nucleotide metabolism
R-HSA-5368287.split2	Mitochondrial translation	8	4	SLED8.4	Transcription, translation, IFN-II and -III	IFN-II and -III, transcription, translation, response to reactive oxygen species, purine and nucleotide metabolism
R-HSA-5419276.split1	Mitochondrial translation termination	8	4	SLED8.4	Transcription, translation, IFN-II and -III	IFN-II and -III, transcription, translation, response to reactive oxygen species, purine and nucleotide metabolism
hsa00230.split5	Purine metabolism	8	4	SLED8.4	Transcription, translation, IFN-II and -III	IFN-II and -III, transcription, translation, response to reactive oxygen species, purine and nucleotide metabolism
hsa00983.split3	Drug metabolism - other enzymes	8	4	SLED8.4	Transcription, translation, IFN-II and -III	IFN-II and -III, transcription, translation, response to reactive oxygen species, purine and nucleotide metabolism
WP111.split1	Electron transport chain: OXPHOS system in mitochondria	8	4	SLED8.4	Transcription, translation, IFN-II and -III	IFN-II and -III, transcription, translation, response to reactive oxygen species, purine and nucleotide metabolism
IFN_II_III.split7	IFN_II_III	8	4	SLED8.4	Transcription, translation, IFN-II and -III	IFN-II and -III, transcription, translation, response to reactive oxygen species, purine and nucleotide metabolism
M14.20.split3	Gene transcription	8	4	SLED8.4	Transcription, translation, IFN-II and -III	IFN-II and -III, transcription, translation, response to reactive oxygen species, purine and nucleotide metabolism
M14.72.split1	TBD	8	4	SLED8.4	Transcription, translation, IFN-II and -III	IFN-II and -III, transcription, translation, response to reactive oxygen species, purine and nucleotide metabolism
M15.51.split1	Protein synthesis	8	4	SLED8.4	Transcription, translation, IFN-II and -III	IFN-II and -III, transcription, translation, response to reactive oxygen species, purine and nucleotide metabolism
DC.M7.4.split1	Undetermined	8	5	SLED8.5	Transcription, translation, IFN-II and -III	Transcription, translation, protein modification, response to IL7, glutahione, glucose, and purine metabolism
GO:0001824.split2	blastocyst development	8	5	SLED8.5	Transcription, translation, IFN-II and -III	Transcription, translation, protein modification, response to IL7, glutahione, glucose, and purine metabolism
GO:0006006.split5	glucose metabolic process	8	5	SLED8.5	Transcription, translation, IFN-II and -III	Transcription, translation, protein modification, response to IL7, glutahione, glucose, and purine metabolism
GO:0006413.split1	translational initiation	8	5	SLED8.5	Transcription, translation, IFN-II and -III	Transcription, translation, protein modification, response to IL7, glutahione, glucose, and purine metabolism
GO:0006900.split3	vesicle budding from membrane	8	5	SLED8.5	Transcription, translation, IFN-II and -III	Transcription, translation, protein modification, response to IL7, glutahione, glucose, and purine metabolism
GO:0033619.split1	membrane protein proteolysis	8	5	SLED8.5	Transcription, translation, IFN-II and -III	Transcription, translation, protein modification, response to IL7, glutahione, glucose, and purine metabolism
GO:0045727.split5	positive regulation of translation	8	5	SLED8.5	Transcription, translation, IFN-II and -III	Transcription, translation, protein modification, response to IL7, glutahione, glucose, and purine metabolism
GO:0071375.split1	cellular response to peptide hormone stimulus	8	5	SLED8.5	Transcription, translation, IFN-II and -III	Transcription, translation, protein modification, response to IL7, glutahione, glucose, and purine metabolism
GO:0098761.split1	cellular response to interleukin-7	8	5	SLED8.5	Transcription, translation, IFN-II and -III	Transcription, translation, protein modification, response to IL7, glutahione, glucose, and purine metabolism
GO:0005681.split4	spliceosomal complex	8	5	SLED8.5	Transcription, translation, IFN-II and -III	Transcription, translation, protein modification, response to IL7, glutahione, glucose, and purine metabolism
GO:0005682.split2	U5 snRNP	8	5	SLED8.5	Transcription, translation, IFN-II and -III	Transcription, translation, protein modification, response to IL7, glutahione, glucose, and purine metabolism
GO:0005684.split3	U2-type spliceosomal complex	8	5	SLED8.5	Transcription, translation, IFN-II and -III	Transcription, translation, protein modification, response to IL7, glutahione, glucose, and purine metabolism
GO:0043229.split5	intracellular organelle	8	5	SLED8.5	Transcription, translation, IFN-II and -III	Transcription, translation, protein modification, response to IL7, glutahione, glucose, and purine metabolism
GO:0071006.split1	U2-type catalytic step 1 spliceosome	8	5	SLED8.5	Transcription, translation, IFN-II and -III	Transcription, translation, protein modification, response to IL7, glutahione, glucose, and purine metabolism
GO:0071817	MMXD complex	8	5	SLED8.5	Transcription, translation, IFN-II and -III	Transcription, translation, protein modification, response to IL7, glutahione, glucose, and purine metabolism
GO:0099524.split1	postsynaptic cytosol	8	5	SLED8.5	Transcription, translation, IFN-II and -III	Transcription, translation, protein modification, response to IL7, glutahione, glucose, and purine metabolism
GO:0003743.split1	translation initiation factor activity	8	5	SLED8.5	Transcription, translation, IFN-II and -III	Transcription, translation, protein modification, response to IL7, glutahione, glucose, and purine metabolism
GO:0003755.split3	peptidyl-prolyl cis-trans isomerase activity	8	5	SLED8.5	Transcription, translation, IFN-II and -III	Transcription, translation, protein modification, response to IL7, glutahione, glucose, and purine metabolism
GO:0004519.split2	endonuclease activity	8	5	SLED8.5	Transcription, translation, IFN-II and -III	Transcription, translation, protein modification, response to IL7, glutahione, glucose, and purine metabolism
GO:0009055.split2	electron transfer activity	8	5	SLED8.5	Transcription, translation, IFN-II and -III	Transcription, translation, protein modification, response to IL7, glutahione, glucose, and purine metabolism
GO:0019843.split3	rRNA binding	8	5	SLED8.5	Transcription, translation, IFN-II and -III	Transcription, translation, protein modification, response to IL7, glutahione, glucose, and purine metabolism
R-HSA-72766.split1	Translation	8	5	SLED8.5	Transcription, translation, IFN-II and -III	Transcription, translation, protein modification, response to IL7, glutahione, glucose, and purine metabolism
R-HSA-73856.split2	RNA Polymerase II Transcription Termination	8	5	SLED8.5	Transcription, translation, IFN-II and -III	Transcription, translation, protein modification, response to IL7, glutahione, glucose, and purine metabolism
hsa00030.split2	Pentose phosphate pathway	8	5	SLED8.5	Transcription, translation, IFN-II and -III	Transcription, translation, protein modification, response to IL7, glutahione, glucose, and purine metabolism
hsa00480.split3	Glutathione metabolism	8	5	SLED8.5	Transcription, translation, IFN-II and -III	Transcription, translation, protein modification, response to IL7, glutahione, glucose, and purine metabolism
hsa01240.split5	Biosynthesis of cofactors	8	5	SLED8.5	Transcription, translation, IFN-II and -III	Transcription, translation, protein modification, response to IL7, glutahione, glucose, and purine metabolism
WP465.split4	Tryptophan metabolism	8	5	SLED8.5	Transcription, translation, IFN-II and -III	Transcription, translation, protein modification, response to IL7, glutahione, glucose, and purine metabolism
WP4792.split1	Purine metabolism	8	5	SLED8.5	Transcription, translation, IFN-II and -III	Transcription, translation, protein modification, response to IL7, glutahione, glucose, and purine metabolism
M12.4.split3	Gene transcription	8	5	SLED8.5	Transcription, translation, IFN-II and -III	Transcription, translation, protein modification, response to IL7, glutahione, glucose, and purine metabolism
M13.4.split4	Protein synthesis	8	5	SLED8.5	Transcription, translation, IFN-II and -III	Transcription, translation, protein modification, response to IL7, glutahione, glucose, and purine metabolism
M14.3.split3	Protein modification	8	5	SLED8.5	Transcription, translation, IFN-II and -III	Transcription, translation, protein modification, response to IL7, glutahione, glucose, and purine metabolism
M15.23.split1	Cell death	8	5	SLED8.5	Transcription, translation, IFN-II and -III	Transcription, translation, protein modification, response to IL7, glutahione, glucose, and purine metabolism
Pericytes.split4	Pericytes	8	5	SLED8.5	Transcription, translation, IFN-II and -III	Transcription, translation, protein modification, response to IL7, glutahione, glucose, and purine metabolism
DC.M8.61.split3	Undetermined	8	6	SLED8.6	Transcription, translation, IFN-II and -III	mRNA processing, mitotic spindle organization
GO:0030155.split1	regulation of cell adhesion	8	6	SLED8.6	Transcription, translation, IFN-II and -III	mRNA processing, mitotic spindle organization
GO:0032922.split5	circadian regulation of gene expression	8	6	SLED8.6	Transcription, translation, IFN-II and -III	mRNA processing, mitotic spindle organization
GO:0043409.split1	negative regulation of MAPK cascade	8	6	SLED8.6	Transcription, translation, IFN-II and -III	mRNA processing, mitotic spindle organization
GO:0043968.split2	histone H2A acetylation	8	6	SLED8.6	Transcription, translation, IFN-II and -III	mRNA processing, mitotic spindle organization
GO:0060236.split2	regulation of mitotic spindle organization	8	6	SLED8.6	Transcription, translation, IFN-II and -III	mRNA processing, mitotic spindle organization
GO:1902661	positive regulation of glucose mediated signaling pathway	8	6	SLED8.6	Transcription, translation, IFN-II and -III	mRNA processing, mitotic spindle organization
GO:0071004.split1	U2-type prespliceosome	8	6	SLED8.6	Transcription, translation, IFN-II and -III	mRNA processing, mitotic spindle organization
R-HSA-380259.split6	Loss of Nlp from mitotic centrosomes	8	6	SLED8.6	Transcription, translation, IFN-II and -III	mRNA processing, mitotic spindle organization
R-HSA-380320.split7	Recruitment of NuMA to mitotic centrosomes	8	6	SLED8.6	Transcription, translation, IFN-II and -III	mRNA processing, mitotic spindle organization
R-HSA-72187.split1	mRNA 3'-end processing	8	6	SLED8.6	Transcription, translation, IFN-II and -III	mRNA processing, mitotic spindle organization
R-HSA-72202.split3	Transport of Mature Transcript to Cytoplasm	8	6	SLED8.6	Transcription, translation, IFN-II and -III	mRNA processing, mitotic spindle organization
M15.34.split2	T cells	8	6	SLED8.6	Transcription, translation, IFN-II and -III	mRNA processing, mitotic spindle organization
M15.46.split1	TBD	8	6	SLED8.6	Transcription, translation, IFN-II and -III	mRNA processing, mitotic spindle organization
GO:0000447.split1	endonucleolytic cleavage in ITS1 to separate SSU-rRNA from 5.8S rRNA and LSU-rRNA from tricistronic rRNA transcript (SSU-rRNA, 5.8S rRNA, LSU-rRNA)	8	7	SLED8.7	Transcription, translation, IFN-II and -III	Transcription initiation and elongation, mRNA splicing and modification, telomere maintenance
GO:0009116.split1	nucleoside metabolic process	8	7	SLED8.7	Transcription, translation, IFN-II and -III	Transcription initiation and elongation, mRNA splicing and modification, telomere maintenance
GO:0009451.split1	RNA modification	8	7	SLED8.7	Transcription, translation, IFN-II and -III	Transcription initiation and elongation, mRNA splicing and modification, telomere maintenance
GO:0022900.split4	electron transport chain	8	7	SLED8.7	Transcription, translation, IFN-II and -III	Transcription initiation and elongation, mRNA splicing and modification, telomere maintenance
GO:0042542.split1	response to hydrogen peroxide	8	7	SLED8.7	Transcription, translation, IFN-II and -III	Transcription initiation and elongation, mRNA splicing and modification, telomere maintenance
GO:0005697.split1	telomerase holoenzyme complex	8	7	SLED8.7	Transcription, translation, IFN-II and -III	Transcription initiation and elongation, mRNA splicing and modification, telomere maintenance
GO:0031428	box C/D RNP complex	8	7	SLED8.7	Transcription, translation, IFN-II and -III	Transcription initiation and elongation, mRNA splicing and modification, telomere maintenance
GO:0042056.split2	chemoattractant activity	8	7	SLED8.7	Transcription, translation, IFN-II and -III	Transcription initiation and elongation, mRNA splicing and modification, telomere maintenance
R-HSA-113418.split4	Formation of the Early Elongation Complex	8	7	SLED8.7	Transcription, translation, IFN-II and -III	Transcription initiation and elongation, mRNA splicing and modification, telomere maintenance
R-HSA-157579.split6	Telomere Maintenance	8	7	SLED8.7	Transcription, translation, IFN-II and -III	Transcription initiation and elongation, mRNA splicing and modification, telomere maintenance
R-HSA-167152.split5	Formation of HIV elongation complex in the absence of HIV Tat	8	7	SLED8.7	Transcription, translation, IFN-II and -III	Transcription initiation and elongation, mRNA splicing and modification, telomere maintenance
R-HSA-167160.split4	RNA Pol II CTD phosphorylation and interaction with CE during HIV infection	8	7	SLED8.7	Transcription, translation, IFN-II and -III	Transcription initiation and elongation, mRNA splicing and modification, telomere maintenance
R-HSA-167246.split5	Tat-mediated elongation of the HIV-1 transcript	8	7	SLED8.7	Transcription, translation, IFN-II and -III	Transcription initiation and elongation, mRNA splicing and modification, telomere maintenance
R-HSA-429914.split3	Deadenylation-dependent mRNA decay	8	7	SLED8.7	Transcription, translation, IFN-II and -III	Transcription initiation and elongation, mRNA splicing and modification, telomere maintenance
R-HSA-5601884.split1	PIWI-interacting RNA (piRNA) biogenesis	8	7	SLED8.7	Transcription, translation, IFN-II and -III	Transcription initiation and elongation, mRNA splicing and modification, telomere maintenance
R-HSA-5655253.split2	Signaling by FGFR2 in disease	8	7	SLED8.7	Transcription, translation, IFN-II and -III	Transcription initiation and elongation, mRNA splicing and modification, telomere maintenance
R-HSA-72165.split1	mRNA Splicing - Minor Pathway	8	7	SLED8.7	Transcription, translation, IFN-II and -III	Transcription initiation and elongation, mRNA splicing and modification, telomere maintenance
R-HSA-72172.split5	mRNA Splicing	8	7	SLED8.7	Transcription, translation, IFN-II and -III	Transcription initiation and elongation, mRNA splicing and modification, telomere maintenance
R-HSA-73776.split6	RNA Polymerase II Promoter Escape	8	7	SLED8.7	Transcription, translation, IFN-II and -III	Transcription initiation and elongation, mRNA splicing and modification, telomere maintenance
R-HSA-75955.split5	RNA Polymerase II Transcription Elongation	8	7	SLED8.7	Transcription, translation, IFN-II and -III	Transcription initiation and elongation, mRNA splicing and modification, telomere maintenance
R-HSA-77075.split4	RNA Pol II CTD phosphorylation and interaction with CE	8	7	SLED8.7	Transcription, translation, IFN-II and -III	Transcription initiation and elongation, mRNA splicing and modification, telomere maintenance
WP15.split3	Selenium micronutrient network	8	7	SLED8.7	Transcription, translation, IFN-II and -III	Transcription initiation and elongation, mRNA splicing and modification, telomere maintenance
WP405.split5	Eukaryotic transcription initiation	8	7	SLED8.7	Transcription, translation, IFN-II and -III	Transcription initiation and elongation, mRNA splicing and modification, telomere maintenance
M12.4.split1	Gene transcription	8	7	SLED8.7	Transcription, translation, IFN-II and -III	Transcription initiation and elongation, mRNA splicing and modification, telomere maintenance
M14.4.split1	Gene transcription	8	7	SLED8.7	Transcription, translation, IFN-II and -III	Transcription initiation and elongation, mRNA splicing and modification, telomere maintenance
M14.5.split1	Gene transcription	8	7	SLED8.7	Transcription, translation, IFN-II and -III	Transcription initiation and elongation, mRNA splicing and modification, telomere maintenance
M14.16.split1	TBD	8	7	SLED8.7	Transcription, translation, IFN-II and -III	Transcription initiation and elongation, mRNA splicing and modification, telomere maintenance
M14.49	Gene transcription	8	7	SLED8.7	Transcription, translation, IFN-II and -III	Transcription initiation and elongation, mRNA splicing and modification, telomere maintenance
GO:0000469	cleavage involved in rRNA processing	8	8	SLED8.8	Transcription, translation, IFN-II and -III	rRNA processing
GO:0000470.split2	maturation of LSU-rRNA	8	8	SLED8.8	Transcription, translation, IFN-II and -III	rRNA processing
GO:0001018	mitochondrial promoter sequence-specific DNA binding	8	8	SLED8.8	Transcription, translation, IFN-II and -III	rRNA processing
GO:0008236.split3	serine-type peptidase activity	8	8	SLED8.8	Transcription, translation, IFN-II and -III	rRNA processing
GO:0070182.split2	DNA polymerase binding	8	8	SLED8.8	Transcription, translation, IFN-II and -III	rRNA processing
GO:0002191	cap-dependent translational initiation	8	9	SLED8.9	Transcription, translation, IFN-II and -III	Cap-dependent translational initiation, oxidations, non-carbon metabolism
GO:0006693.split3	prostaglandin metabolic process	8	9	SLED8.9	Transcription, translation, IFN-II and -III	Cap-dependent translational initiation, oxidations, non-carbon metabolism
GO:0004032.split1	alditol:NADP+ 1-oxidoreductase activity	8	9	SLED8.9	Transcription, translation, IFN-II and -III	Cap-dependent translational initiation, oxidations, non-carbon metabolism
GO:0047834.split1	D-threo-aldose 1-dehydrogenase activity	8	9	SLED8.9	Transcription, translation, IFN-II and -III	Cap-dependent translational initiation, oxidations, non-carbon metabolism
R-HSA-156580.split4	Phase II - Conjugation of compounds	8	9	SLED8.9	Transcription, translation, IFN-II and -III	Cap-dependent translational initiation, oxidations, non-carbon metabolism
R-HSA-211859.split5	Biological oxidations	8	9	SLED8.9	Transcription, translation, IFN-II and -III	Cap-dependent translational initiation, oxidations, non-carbon metabolism
hsa00040.split3	Pentose and glucuronate interconversions	8	9	SLED8.9	Transcription, translation, IFN-II and -III	Cap-dependent translational initiation, oxidations, non-carbon metabolism
WP2525.split5	Trans-sulfuration and one-carbon metabolism	8	9	SLED8.9	Transcription, translation, IFN-II and -III	Cap-dependent translational initiation, oxidations, non-carbon metabolism
WP3940.split4	One-carbon metabolism and related pathways	8	9	SLED8.9	Transcription, translation, IFN-II and -III	Cap-dependent translational initiation, oxidations, non-carbon metabolism
GO:0008652.split2	cellular amino acid biosynthetic process	8	10	SLED8.10	Transcription, translation, IFN-II and -III	Cellular amino acid biosynthetic process, cysteine, methionine and tyrosine metabolism
GO:0010033.split2	response to organic substance	8	10	SLED8.10	Transcription, translation, IFN-II and -III	Cellular amino acid biosynthetic process, cysteine, methionine and tyrosine metabolism
GO:0101031.split3	chaperone complex	8	10	SLED8.10	Transcription, translation, IFN-II and -III	Cellular amino acid biosynthetic process, cysteine, methionine and tyrosine metabolism
GO:0001094.split2	TFIID-class transcription factor complex binding	8	10	SLED8.10	Transcription, translation, IFN-II and -III	Cellular amino acid biosynthetic process, cysteine, methionine and tyrosine metabolism
GO:0008483.split1	transaminase activity	8	10	SLED8.10	Transcription, translation, IFN-II and -III	Cellular amino acid biosynthetic process, cysteine, methionine and tyrosine metabolism
GO:0008757.split3	S-adenosylmethionine-dependent methyltransferase activity	8	10	SLED8.10	Transcription, translation, IFN-II and -III	Cellular amino acid biosynthetic process, cysteine, methionine and tyrosine metabolism
hsa00270.split4	Cysteine and methionine metabolism	8	10	SLED8.10	Transcription, translation, IFN-II and -III	Cellular amino acid biosynthetic process, cysteine, methionine and tyrosine metabolism
hsa00350.split1	Tyrosine metabolism	8	10	SLED8.10	Transcription, translation, IFN-II and -III	Cellular amino acid biosynthetic process, cysteine, methionine and tyrosine metabolism
WP4504.split1	Cysteine and methionine catabolism	8	10	SLED8.10	Transcription, translation, IFN-II and -III	Cellular amino acid biosynthetic process, cysteine, methionine and tyrosine metabolism
GO:0042574.split3	retinal metabolic process	8	11	SLED8.11	Transcription, translation, IFN-II and -III	Peroxisome
GO:0051899.split2	membrane depolarization	8	11	SLED8.11	Transcription, translation, IFN-II and -III	Peroxisome
GO:0005777.split10	peroxisome	8	11	SLED8.11	Transcription, translation, IFN-II and -III	Peroxisome
R-HSA-156590.split4	Glutathione conjugation	8	11	SLED8.11	Transcription, translation, IFN-II and -III	Peroxisome
R-HSA-9033241.split7	Peroxisomal protein import	8	11	SLED8.11	Transcription, translation, IFN-II and -III	Peroxisome
LI.M4.13	cell junction (GO)	9	1	SLED9.1	Phagocytosis, antigen processing and presentation	Autophagy, lysosome related activity, response to lipoproteins, macrophages
LI.M38.split1	chemokines and receptors	9	1	SLED9.1	Phagocytosis, antigen processing and presentation	Autophagy, lysosome related activity, response to lipoproteins, macrophages
GO:0007041.split2	lysosomal transport	9	1	SLED9.1	Phagocytosis, antigen processing and presentation	Autophagy, lysosome related activity, response to lipoproteins, macrophages
GO:0071404.split1	cellular response to low-density lipoprotein particle stimulus	9	1	SLED9.1	Phagocytosis, antigen processing and presentation	Autophagy, lysosome related activity, response to lipoproteins, macrophages
GO:0090160.split1	Golgi to lysosome transport	9	1	SLED9.1	Phagocytosis, antigen processing and presentation	Autophagy, lysosome related activity, response to lipoproteins, macrophages
GO:1901029.split3	negative regulation of mitochondrial outer membrane permeabilization involved in apoptotic signaling pathway	9	1	SLED9.1	Phagocytosis, antigen processing and presentation	Autophagy, lysosome related activity, response to lipoproteins, macrophages
GO:0038024.split3	cargo receptor activity	9	1	SLED9.1	Phagocytosis, antigen processing and presentation	Autophagy, lysosome related activity, response to lipoproteins, macrophages
R-HSA-428157.split2	Sphingolipid metabolism	9	1	SLED9.1	Phagocytosis, antigen processing and presentation	Autophagy, lysosome related activity, response to lipoproteins, macrophages
R-HSA-532668.split3	N-glycan trimming in the ER and Calnexin/Calreticulin cycle	9	1	SLED9.1	Phagocytosis, antigen processing and presentation	Autophagy, lysosome related activity, response to lipoproteins, macrophages
R-HSA-5609975.split1	Diseases associated with glycosylation precursor biosynthesis	9	1	SLED9.1	Phagocytosis, antigen processing and presentation	Autophagy, lysosome related activity, response to lipoproteins, macrophages
R-HSA-8964043.split3	Plasma lipoprotein clearance	9	1	SLED9.1	Phagocytosis, antigen processing and presentation	Autophagy, lysosome related activity, response to lipoproteins, macrophages
R-HSA-8964315.split2	G beta:gamma signalling through BTK	9	1	SLED9.1	Phagocytosis, antigen processing and presentation	Autophagy, lysosome related activity, response to lipoproteins, macrophages
R-HSA-901032.split2	ER Quality Control Compartment (ERQC)	9	1	SLED9.1	Phagocytosis, antigen processing and presentation	Autophagy, lysosome related activity, response to lipoproteins, macrophages
R-HSA-9613829.split3	Chaperone Mediated Autophagy	9	1	SLED9.1	Phagocytosis, antigen processing and presentation	Autophagy, lysosome related activity, response to lipoproteins, macrophages
WP4146.split1	Macrophage markers	9	1	SLED9.1	Phagocytosis, antigen processing and presentation	Autophagy, lysosome related activity, response to lipoproteins, macrophages
LI.M31.split1	cell cycle and growth arrest	9	2	SLED9.2	Phagocytosis, antigen processing and presentation	IL8 production, phagocytosis, , regulation of ERK1 and ERK2 cascade, NLRP1 inflammasome complex
GO:0032757.split5	positive regulation of interleukin-8 production	9	2	SLED9.2	Phagocytosis, antigen processing and presentation	IL8 production, phagocytosis, , regulation of ERK1 and ERK2 cascade, NLRP1 inflammasome complex
GO:0034605.split6	cellular response to heat	9	2	SLED9.2	Phagocytosis, antigen processing and presentation	IL8 production, phagocytosis, , regulation of ERK1 and ERK2 cascade, NLRP1 inflammasome complex
GO:0050766.split5	positive regulation of phagocytosis	9	2	SLED9.2	Phagocytosis, antigen processing and presentation	IL8 production, phagocytosis, , regulation of ERK1 and ERK2 cascade, NLRP1 inflammasome complex
GO:0051044.split2	positive regulation of membrane protein ectodomain proteolysis	9	2	SLED9.2	Phagocytosis, antigen processing and presentation	IL8 production, phagocytosis, , regulation of ERK1 and ERK2 cascade, NLRP1 inflammasome complex
GO:0070372.split1	regulation of ERK1 and ERK2 cascade	9	2	SLED9.2	Phagocytosis, antigen processing and presentation	IL8 production, phagocytosis, , regulation of ERK1 and ERK2 cascade, NLRP1 inflammasome complex
GO:0071466.split5	cellular response to xenobiotic stimulus	9	2	SLED9.2	Phagocytosis, antigen processing and presentation	IL8 production, phagocytosis, , regulation of ERK1 and ERK2 cascade, NLRP1 inflammasome complex
GO:0072558	NLRP1 inflammasome complex	9	2	SLED9.2	Phagocytosis, antigen processing and presentation	IL8 production, phagocytosis, , regulation of ERK1 and ERK2 cascade, NLRP1 inflammasome complex
R-HSA-5620971.split2	Pyroptosis	9	2	SLED9.2	Phagocytosis, antigen processing and presentation	IL8 production, phagocytosis, , regulation of ERK1 and ERK2 cascade, NLRP1 inflammasome complex
WP2873.split4	Aryl hydrocarbon receptor pathway	9	2	SLED9.2	Phagocytosis, antigen processing and presentation	IL8 production, phagocytosis, , regulation of ERK1 and ERK2 cascade, NLRP1 inflammasome complex
WP5055.split8	Burn wound healing	9	2	SLED9.2	Phagocytosis, antigen processing and presentation	IL8 production, phagocytosis, , regulation of ERK1 and ERK2 cascade, NLRP1 inflammasome complex
WP5113.split5	Antiviral and anti-inflammatory effects of Nrf2 on SARS-CoV-2 pathway	9	2	SLED9.2	Phagocytosis, antigen processing and presentation	IL8 production, phagocytosis, , regulation of ERK1 and ERK2 cascade, NLRP1 inflammasome complex
LI.M33.split1	inflammatory response	9	3	SLED9.3	Phagocytosis, antigen processing and presentation	Inflammation, IL6, monocytes, TCR, BCR, phagocytosis, C3b binding, FcR mediated inhibotory signaling
LI.M48.split2	TBA	9	3	SLED9.3	Phagocytosis, antigen processing and presentation	Inflammation, IL6, monocytes, TCR, BCR, phagocytosis, C3b binding, FcR mediated inhibotory signaling
GO:0002774	Fc receptor mediated inhibitory signaling pathway	9	3	SLED9.3	Phagocytosis, antigen processing and presentation	Inflammation, IL6, monocytes, TCR, BCR, phagocytosis, C3b binding, FcR mediated inhibotory signaling
GO:0006635.split1	fatty acid beta-oxidation	9	3	SLED9.3	Phagocytosis, antigen processing and presentation	Inflammation, IL6, monocytes, TCR, BCR, phagocytosis, C3b binding, FcR mediated inhibotory signaling
GO:0019076.split2	viral release from host cell	9	3	SLED9.3	Phagocytosis, antigen processing and presentation	Inflammation, IL6, monocytes, TCR, BCR, phagocytosis, C3b binding, FcR mediated inhibotory signaling
GO:0032675.split2	regulation of interleukin-6 production	9	3	SLED9.3	Phagocytosis, antigen processing and presentation	Inflammation, IL6, monocytes, TCR, BCR, phagocytosis, C3b binding, FcR mediated inhibotory signaling
GO:0032930.split2	positive regulation of superoxide anion generation	9	3	SLED9.3	Phagocytosis, antigen processing and presentation	Inflammation, IL6, monocytes, TCR, BCR, phagocytosis, C3b binding, FcR mediated inhibotory signaling
GO:0046034.split3	ATP metabolic process	9	3	SLED9.3	Phagocytosis, antigen processing and presentation	Inflammation, IL6, monocytes, TCR, BCR, phagocytosis, C3b binding, FcR mediated inhibotory signaling
GO:0050764.split2	regulation of phagocytosis	9	3	SLED9.3	Phagocytosis, antigen processing and presentation	Inflammation, IL6, monocytes, TCR, BCR, phagocytosis, C3b binding, FcR mediated inhibotory signaling
GO:0070102.split3	interleukin-6-mediated signaling pathway	9	3	SLED9.3	Phagocytosis, antigen processing and presentation	Inflammation, IL6, monocytes, TCR, BCR, phagocytosis, C3b binding, FcR mediated inhibotory signaling
GO:2001198	regulation of dendritic cell differentiation	9	3	SLED9.3	Phagocytosis, antigen processing and presentation	Inflammation, IL6, monocytes, TCR, BCR, phagocytosis, C3b binding, FcR mediated inhibotory signaling
GO:0005769.split4	early endosome	9	3	SLED9.3	Phagocytosis, antigen processing and presentation	Inflammation, IL6, monocytes, TCR, BCR, phagocytosis, C3b binding, FcR mediated inhibotory signaling
GO:0005814.split8	centriole	9	3	SLED9.3	Phagocytosis, antigen processing and presentation	Inflammation, IL6, monocytes, TCR, BCR, phagocytosis, C3b binding, FcR mediated inhibotory signaling
GO:0016469	proton-transporting two-sector ATPase complex	9	3	SLED9.3	Phagocytosis, antigen processing and presentation	Inflammation, IL6, monocytes, TCR, BCR, phagocytosis, C3b binding, FcR mediated inhibotory signaling
GO:0030140.split3	trans-Golgi network transport vesicle	9	3	SLED9.3	Phagocytosis, antigen processing and presentation	Inflammation, IL6, monocytes, TCR, BCR, phagocytosis, C3b binding, FcR mediated inhibotory signaling
GO:0042101.split6	T cell receptor complex	9	3	SLED9.3	Phagocytosis, antigen processing and presentation	Inflammation, IL6, monocytes, TCR, BCR, phagocytosis, C3b binding, FcR mediated inhibotory signaling
GO:0044853.split3	plasma membrane raft	9	3	SLED9.3	Phagocytosis, antigen processing and presentation	Inflammation, IL6, monocytes, TCR, BCR, phagocytosis, C3b binding, FcR mediated inhibotory signaling
GO:0099091	postsynaptic specialization, intracellular component	9	3	SLED9.3	Phagocytosis, antigen processing and presentation	Inflammation, IL6, monocytes, TCR, BCR, phagocytosis, C3b binding, FcR mediated inhibotory signaling
GO:0110165.split1	cellular anatomical entity	9	3	SLED9.3	Phagocytosis, antigen processing and presentation	Inflammation, IL6, monocytes, TCR, BCR, phagocytosis, C3b binding, FcR mediated inhibotory signaling
GO:0001851	complement component C3b binding	9	3	SLED9.3	Phagocytosis, antigen processing and presentation	Inflammation, IL6, monocytes, TCR, BCR, phagocytosis, C3b binding, FcR mediated inhibotory signaling
GO:0004180.split2	carboxypeptidase activity	9	3	SLED9.3	Phagocytosis, antigen processing and presentation	Inflammation, IL6, monocytes, TCR, BCR, phagocytosis, C3b binding, FcR mediated inhibotory signaling
GO:0005518.split7	collagen binding	9	3	SLED9.3	Phagocytosis, antigen processing and presentation	Inflammation, IL6, monocytes, TCR, BCR, phagocytosis, C3b binding, FcR mediated inhibotory signaling
GO:0031072.split3	heat shock protein binding	9	3	SLED9.3	Phagocytosis, antigen processing and presentation	Inflammation, IL6, monocytes, TCR, BCR, phagocytosis, C3b binding, FcR mediated inhibotory signaling
GO:0046961.split1	proton-transporting ATPase activity, rotational mechanism	9	3	SLED9.3	Phagocytosis, antigen processing and presentation	Inflammation, IL6, monocytes, TCR, BCR, phagocytosis, C3b binding, FcR mediated inhibotory signaling
R-HSA-111465.split3	Apoptotic cleavage of cellular proteins	9	3	SLED9.3	Phagocytosis, antigen processing and presentation	Inflammation, IL6, monocytes, TCR, BCR, phagocytosis, C3b binding, FcR mediated inhibotory signaling
R-HSA-1638074.split2	Keratan sulfate/keratin metabolism	9	3	SLED9.3	Phagocytosis, antigen processing and presentation	Inflammation, IL6, monocytes, TCR, BCR, phagocytosis, C3b binding, FcR mediated inhibotory signaling
R-HSA-193704.split4	p75 NTR receptor-mediated signalling	9	3	SLED9.3	Phagocytosis, antigen processing and presentation	Inflammation, IL6, monocytes, TCR, BCR, phagocytosis, C3b binding, FcR mediated inhibotory signaling
R-HSA-2454202.split3	Fc epsilon receptor (FCERI) signaling	9	3	SLED9.3	Phagocytosis, antigen processing and presentation	Inflammation, IL6, monocytes, TCR, BCR, phagocytosis, C3b binding, FcR mediated inhibotory signaling
R-HSA-3769402.split1	Deactivation of the beta-catenin transactivating complex	9	3	SLED9.3	Phagocytosis, antigen processing and presentation	Inflammation, IL6, monocytes, TCR, BCR, phagocytosis, C3b binding, FcR mediated inhibotory signaling
R-HSA-391160.split1	Signal regulatory protein family interactions	9	3	SLED9.3	Phagocytosis, antigen processing and presentation	Inflammation, IL6, monocytes, TCR, BCR, phagocytosis, C3b binding, FcR mediated inhibotory signaling
R-HSA-392518.split3	Signal amplification	9	3	SLED9.3	Phagocytosis, antigen processing and presentation	Inflammation, IL6, monocytes, TCR, BCR, phagocytosis, C3b binding, FcR mediated inhibotory signaling
R-HSA-3928665.split4	EPH-ephrin mediated repulsion of cells	9	3	SLED9.3	Phagocytosis, antigen processing and presentation	Inflammation, IL6, monocytes, TCR, BCR, phagocytosis, C3b binding, FcR mediated inhibotory signaling
R-HSA-418597.split3	G alpha (z) signalling events	9	3	SLED9.3	Phagocytosis, antigen processing and presentation	Inflammation, IL6, monocytes, TCR, BCR, phagocytosis, C3b binding, FcR mediated inhibotory signaling
R-HSA-5357801.split7	Programmed Cell Death	9	3	SLED9.3	Phagocytosis, antigen processing and presentation	Inflammation, IL6, monocytes, TCR, BCR, phagocytosis, C3b binding, FcR mediated inhibotory signaling
R-HSA-8876198.split3	RAB GEFs exchange GTP for GDP on RABs	9	3	SLED9.3	Phagocytosis, antigen processing and presentation	Inflammation, IL6, monocytes, TCR, BCR, phagocytosis, C3b binding, FcR mediated inhibotory signaling
R-HSA-8964616.split3	G beta:gamma signalling through CDC42	9	3	SLED9.3	Phagocytosis, antigen processing and presentation	Inflammation, IL6, monocytes, TCR, BCR, phagocytosis, C3b binding, FcR mediated inhibotory signaling
R-HSA-9013405.split2	RHOD GTPase cycle	9	3	SLED9.3	Phagocytosis, antigen processing and presentation	Inflammation, IL6, monocytes, TCR, BCR, phagocytosis, C3b binding, FcR mediated inhibotory signaling
R-HSA-9013507.split1	NOTCH3 Activation and Transmission of Signal to the Nucleus	9	3	SLED9.3	Phagocytosis, antigen processing and presentation	Inflammation, IL6, monocytes, TCR, BCR, phagocytosis, C3b binding, FcR mediated inhibotory signaling
R-HSA-937039.split1	IRAK1 recruits IKK complex	9	3	SLED9.3	Phagocytosis, antigen processing and presentation	Inflammation, IL6, monocytes, TCR, BCR, phagocytosis, C3b binding, FcR mediated inhibotory signaling
R-HSA-9637690.split1	Response of Mtb to phagocytosis	9	3	SLED9.3	Phagocytosis, antigen processing and presentation	Inflammation, IL6, monocytes, TCR, BCR, phagocytosis, C3b binding, FcR mediated inhibotory signaling
hsa00520.split2	Amino sugar and nucleotide sugar metabolism	9	3	SLED9.3	Phagocytosis, antigen processing and presentation	Inflammation, IL6, monocytes, TCR, BCR, phagocytosis, C3b binding, FcR mediated inhibotory signaling
hsa04062.split4	Chemokine signaling pathway	9	3	SLED9.3	Phagocytosis, antigen processing and presentation	Inflammation, IL6, monocytes, TCR, BCR, phagocytosis, C3b binding, FcR mediated inhibotory signaling
hsa04662.split3	B cell receptor signaling pathway	9	3	SLED9.3	Phagocytosis, antigen processing and presentation	Inflammation, IL6, monocytes, TCR, BCR, phagocytosis, C3b binding, FcR mediated inhibotory signaling
hsa04933.split7	AGE-RAGE signaling pathway in diabetic complications	9	3	SLED9.3	Phagocytosis, antigen processing and presentation	Inflammation, IL6, monocytes, TCR, BCR, phagocytosis, C3b binding, FcR mediated inhibotory signaling
WP3937.split1	Microglia pathogen phagocytosis pathway	9	3	SLED9.3	Phagocytosis, antigen processing and presentation	Inflammation, IL6, monocytes, TCR, BCR, phagocytosis, C3b binding, FcR mediated inhibotory signaling
WP4970.split1	Galanin receptor pathway	9	3	SLED9.3	Phagocytosis, antigen processing and presentation	Inflammation, IL6, monocytes, TCR, BCR, phagocytosis, C3b binding, FcR mediated inhibotory signaling
WP5063.split1	FOXP3 in COVID-19	9	3	SLED9.3	Phagocytosis, antigen processing and presentation	Inflammation, IL6, monocytes, TCR, BCR, phagocytosis, C3b binding, FcR mediated inhibotory signaling
M14.24.split2	Inflammation	9	3	SLED9.3	Phagocytosis, antigen processing and presentation	Inflammation, IL6, monocytes, TCR, BCR, phagocytosis, C3b binding, FcR mediated inhibotory signaling
M14.65.split1	Monocytes	9	3	SLED9.3	Phagocytosis, antigen processing and presentation	Inflammation, IL6, monocytes, TCR, BCR, phagocytosis, C3b binding, FcR mediated inhibotory signaling
M15.105.split1	Inflammation	9	3	SLED9.3	Phagocytosis, antigen processing and presentation	Inflammation, IL6, monocytes, TCR, BCR, phagocytosis, C3b binding, FcR mediated inhibotory signaling
M16.17.split5	Gene transcription	9	3	SLED9.3	Phagocytosis, antigen processing and presentation	Inflammation, IL6, monocytes, TCR, BCR, phagocytosis, C3b binding, FcR mediated inhibotory signaling
LI.M47.2.split3	enriched in B cells (III)	9	4	SLED9.4	Phagocytosis, antigen processing and presentation	DC differentiation, B cells, neutrophils, macroautophagy, cytosolic DNA sensing
LI.M109.split2	receptors, cell migration	9	4	SLED9.4	Phagocytosis, antigen processing and presentation	DC differentiation, B cells, neutrophils, macroautophagy, cytosolic DNA sensing
GO:0001568.split3	blood vessel development	9	4	SLED9.4	Phagocytosis, antigen processing and presentation	DC differentiation, B cells, neutrophils, macroautophagy, cytosolic DNA sensing
GO:0006402.split5	mRNA catabolic process	9	4	SLED9.4	Phagocytosis, antigen processing and presentation	DC differentiation, B cells, neutrophils, macroautophagy, cytosolic DNA sensing
GO:0007034.split2	vacuolar transport	9	4	SLED9.4	Phagocytosis, antigen processing and presentation	DC differentiation, B cells, neutrophils, macroautophagy, cytosolic DNA sensing
GO:0016241.split2	regulation of macroautophagy	9	4	SLED9.4	Phagocytosis, antigen processing and presentation	DC differentiation, B cells, neutrophils, macroautophagy, cytosolic DNA sensing
GO:0032570.split3	response to progesterone	9	4	SLED9.4	Phagocytosis, antigen processing and presentation	DC differentiation, B cells, neutrophils, macroautophagy, cytosolic DNA sensing
GO:0043162.split2	ubiquitin-dependent protein catabolic process via the multivesicular body sorting pathway	9	4	SLED9.4	Phagocytosis, antigen processing and presentation	DC differentiation, B cells, neutrophils, macroautophagy, cytosolic DNA sensing
GO:0043330.split1	response to exogenous dsRNA	9	4	SLED9.4	Phagocytosis, antigen processing and presentation	DC differentiation, B cells, neutrophils, macroautophagy, cytosolic DNA sensing
GO:0048714.split3	positive regulation of oligodendrocyte differentiation	9	4	SLED9.4	Phagocytosis, antigen processing and presentation	DC differentiation, B cells, neutrophils, macroautophagy, cytosolic DNA sensing
GO:0051085.split1	chaperone cofactor-dependent protein refolding	9	4	SLED9.4	Phagocytosis, antigen processing and presentation	DC differentiation, B cells, neutrophils, macroautophagy, cytosolic DNA sensing
GO:0071726	cellular response to diacyl bacterial lipopeptide	9	4	SLED9.4	Phagocytosis, antigen processing and presentation	DC differentiation, B cells, neutrophils, macroautophagy, cytosolic DNA sensing
GO:0097028.split1	dendritic cell differentiation	9	4	SLED9.4	Phagocytosis, antigen processing and presentation	DC differentiation, B cells, neutrophils, macroautophagy, cytosolic DNA sensing
GO:2001240.split1	negative regulation of extrinsic apoptotic signaling pathway in absence of ligand	9	4	SLED9.4	Phagocytosis, antigen processing and presentation	DC differentiation, B cells, neutrophils, macroautophagy, cytosolic DNA sensing
GO:0005828.split1	kinetochore microtubule	9	4	SLED9.4	Phagocytosis, antigen processing and presentation	DC differentiation, B cells, neutrophils, macroautophagy, cytosolic DNA sensing
GO:0032585.split1	multivesicular body membrane	9	4	SLED9.4	Phagocytosis, antigen processing and presentation	DC differentiation, B cells, neutrophils, macroautophagy, cytosolic DNA sensing
GO:0032993.split4	protein-DNA complex	9	4	SLED9.4	Phagocytosis, antigen processing and presentation	DC differentiation, B cells, neutrophils, macroautophagy, cytosolic DNA sensing
GO:0000979.split2	RNA polymerase II core promoter sequence-specific DNA binding	9	4	SLED9.4	Phagocytosis, antigen processing and presentation	DC differentiation, B cells, neutrophils, macroautophagy, cytosolic DNA sensing
GO:0008235.split3	metalloexopeptidase activity	9	4	SLED9.4	Phagocytosis, antigen processing and presentation	DC differentiation, B cells, neutrophils, macroautophagy, cytosolic DNA sensing
GO:0019003.split3	GDP binding	9	4	SLED9.4	Phagocytosis, antigen processing and presentation	DC differentiation, B cells, neutrophils, macroautophagy, cytosolic DNA sensing
GO:0042169.split5	SH2 domain binding	9	4	SLED9.4	Phagocytosis, antigen processing and presentation	DC differentiation, B cells, neutrophils, macroautophagy, cytosolic DNA sensing
R-HSA-162588.split3	Budding and maturation of HIV virion	9	4	SLED9.4	Phagocytosis, antigen processing and presentation	DC differentiation, B cells, neutrophils, macroautophagy, cytosolic DNA sensing
R-HSA-373080.split2	Class B/2 (Secretin family receptors)	9	4	SLED9.4	Phagocytosis, antigen processing and presentation	DC differentiation, B cells, neutrophils, macroautophagy, cytosolic DNA sensing
R-HSA-450531.split6	Regulation of mRNA stability by proteins that bind AU-rich elements	9	4	SLED9.4	Phagocytosis, antigen processing and presentation	DC differentiation, B cells, neutrophils, macroautophagy, cytosolic DNA sensing
R-HSA-9671555.split1	Signaling by PDGFR in disease	9	4	SLED9.4	Phagocytosis, antigen processing and presentation	DC differentiation, B cells, neutrophils, macroautophagy, cytosolic DNA sensing
hsa04141.split4	Protein processing in endoplasmic reticulum	9	4	SLED9.4	Phagocytosis, antigen processing and presentation	DC differentiation, B cells, neutrophils, macroautophagy, cytosolic DNA sensing
hsa04623.split4	Cytosolic DNA-sensing pathway	9	4	SLED9.4	Phagocytosis, antigen processing and presentation	DC differentiation, B cells, neutrophils, macroautophagy, cytosolic DNA sensing
WP3644.split2	NAD+ metabolism	9	4	SLED9.4	Phagocytosis, antigen processing and presentation	DC differentiation, B cells, neutrophils, macroautophagy, cytosolic DNA sensing
WP3890	Nanomaterial-induced inflammasome activation	9	4	SLED9.4	Phagocytosis, antigen processing and presentation	DC differentiation, B cells, neutrophils, macroautophagy, cytosolic DNA sensing
M14.9.split2	TBD	9	4	SLED9.4	Phagocytosis, antigen processing and presentation	DC differentiation, B cells, neutrophils, macroautophagy, cytosolic DNA sensing
M15.35.split2	Neutrophils	9	4	SLED9.4	Phagocytosis, antigen processing and presentation	DC differentiation, B cells, neutrophils, macroautophagy, cytosolic DNA sensing
DC.M7.21.split5	Undetermined	9	5	SLED9.5	Phagocytosis, antigen processing and presentation	Antigen processing and presentation, MHC-I, TLR2
DC.M9.47.split2	Undetermined	9	5	SLED9.5	Phagocytosis, antigen processing and presentation	Antigen processing and presentation, MHC-I, TLR2
GO:0034134	toll-like receptor 2 signaling pathway	9	5	SLED9.5	Phagocytosis, antigen processing and presentation	Antigen processing and presentation, MHC-I, TLR2
GO:0045321.split1	leukocyte activation	9	5	SLED9.5	Phagocytosis, antigen processing and presentation	Antigen processing and presentation, MHC-I, TLR2
GO:0048147.split3	negative regulation of fibroblast proliferation	9	5	SLED9.5	Phagocytosis, antigen processing and presentation	Antigen processing and presentation, MHC-I, TLR2
GO:0050777.split2	negative regulation of immune response	9	5	SLED9.5	Phagocytosis, antigen processing and presentation	Antigen processing and presentation, MHC-I, TLR2
GO:0051865.split1	protein autoubiquitination	9	5	SLED9.5	Phagocytosis, antigen processing and presentation	Antigen processing and presentation, MHC-I, TLR2
GO:1902564	negative regulation of neutrophil activation	9	5	SLED9.5	Phagocytosis, antigen processing and presentation	Antigen processing and presentation, MHC-I, TLR2
GO:0042612.split1	MHC class I protein complex	9	5	SLED9.5	Phagocytosis, antigen processing and presentation	Antigen processing and presentation, MHC-I, TLR2
GO:0044322.split1	endoplasmic reticulum quality control compartment	9	5	SLED9.5	Phagocytosis, antigen processing and presentation	Antigen processing and presentation, MHC-I, TLR2
GO:0044530	supraspliceosomal complex	9	5	SLED9.5	Phagocytosis, antigen processing and presentation	Antigen processing and presentation, MHC-I, TLR2
GO:0042288.split1	MHC class I protein binding	9	5	SLED9.5	Phagocytosis, antigen processing and presentation	Antigen processing and presentation, MHC-I, TLR2
hsa04218.split4	Cellular senescence	9	5	SLED9.5	Phagocytosis, antigen processing and presentation	Antigen processing and presentation, MHC-I, TLR2
hsa04612.split3	Antigen processing and presentation	9	5	SLED9.5	Phagocytosis, antigen processing and presentation	Antigen processing and presentation, MHC-I, TLR2
WP2328.split6	Allograft Rejection	9	5	SLED9.5	Phagocytosis, antigen processing and presentation	Antigen processing and presentation, MHC-I, TLR2
M14.41.split3	TBD	9	5	SLED9.5	Phagocytosis, antigen processing and presentation	Antigen processing and presentation, MHC-I, TLR2
APCs	APCs	9	5	SLED9.5	Phagocytosis, antigen processing and presentation	Antigen processing and presentation, MHC-I, TLR2
DC.M9.18.split4	Undetermined	9	6	SLED9.6	Phagocytosis, antigen processing and presentation	Nucleosome assembly, cellular oxidant detoxification, CLP, stem cell population maintenance
GO:0006334.split5	nucleosome assembly	9	6	SLED9.6	Phagocytosis, antigen processing and presentation	Nucleosome assembly, cellular oxidant detoxification, CLP, stem cell population maintenance
GO:0019079.split1	viral genome replication	9	6	SLED9.6	Phagocytosis, antigen processing and presentation	Nucleosome assembly, cellular oxidant detoxification, CLP, stem cell population maintenance
GO:0019827.split1	stem cell population maintenance	9	6	SLED9.6	Phagocytosis, antigen processing and presentation	Nucleosome assembly, cellular oxidant detoxification, CLP, stem cell population maintenance
GO:0098869.split6	cellular oxidant detoxification	9	6	SLED9.6	Phagocytosis, antigen processing and presentation	Nucleosome assembly, cellular oxidant detoxification, CLP, stem cell population maintenance
GO:0047134	protein-disulfide reductase (NAD(P)) activity	9	6	SLED9.6	Phagocytosis, antigen processing and presentation	Nucleosome assembly, cellular oxidant detoxification, CLP, stem cell population maintenance
GO:0050661.split4	NADP binding	9	6	SLED9.6	Phagocytosis, antigen processing and presentation	Nucleosome assembly, cellular oxidant detoxification, CLP, stem cell population maintenance
WP4290.split3	Metabolic reprogramming in colon cancer	9	6	SLED9.6	Phagocytosis, antigen processing and presentation	Nucleosome assembly, cellular oxidant detoxification, CLP, stem cell population maintenance
M14.70.split1	TBD	9	6	SLED9.6	Phagocytosis, antigen processing and presentation	Nucleosome assembly, cellular oxidant detoxification, CLP, stem cell population maintenance
CLP.split3	CLP	9	6	SLED9.6	Phagocytosis, antigen processing and presentation	Nucleosome assembly, cellular oxidant detoxification, CLP, stem cell population maintenance
GO:0006367.split3	transcription initiation from RNA polymerase II promoter	9	7	SLED9.7	Phagocytosis, antigen processing and presentation	RNA polymerase II transcription initiation
GO:0016251.split2	RNA polymerase II general transcription initiation factor activity	9	7	SLED9.7	Phagocytosis, antigen processing and presentation	RNA polymerase II transcription initiation
GO:0017025.split3	TBP-class protein binding	9	7	SLED9.7	Phagocytosis, antigen processing and presentation	RNA polymerase II transcription initiation
GO:0004298.split2	threonine-type endopeptidase activity	9	8	SLED9.8	Phagocytosis, antigen processing and presentation	BCR downstream signaling, activation of NF-kB in B cells, non-canonical NF-kB siganling, DNA replication pre-initiation
R-HSA-1168372.split4	Downstream signaling events of B Cell Receptor (BCR)	9	8	SLED9.8	Phagocytosis, antigen processing and presentation	BCR downstream signaling, activation of NF-kB in B cells, non-canonical NF-kB siganling, DNA replication pre-initiation
R-HSA-1169091.split4	Activation of NF-kappaB in B cells	9	8	SLED9.8	Phagocytosis, antigen processing and presentation	BCR downstream signaling, activation of NF-kB in B cells, non-canonical NF-kB siganling, DNA replication pre-initiation
R-HSA-174154.split4	APC/C:Cdc20 mediated degradation of Securin	9	8	SLED9.8	Phagocytosis, antigen processing and presentation	BCR downstream signaling, activation of NF-kB in B cells, non-canonical NF-kB siganling, DNA replication pre-initiation
R-HSA-180585.split1	Vif-mediated degradation of APOBEC3G	9	8	SLED9.8	Phagocytosis, antigen processing and presentation	BCR downstream signaling, activation of NF-kB in B cells, non-canonical NF-kB siganling, DNA replication pre-initiation
R-HSA-450408.split3	AUF1 (hnRNP D0) binds and destabilizes mRNA	9	8	SLED9.8	Phagocytosis, antigen processing and presentation	BCR downstream signaling, activation of NF-kB in B cells, non-canonical NF-kB siganling, DNA replication pre-initiation
R-HSA-5387390.split4	Hh mutants abrogate ligand secretion	9	8	SLED9.8	Phagocytosis, antigen processing and presentation	BCR downstream signaling, activation of NF-kB in B cells, non-canonical NF-kB siganling, DNA replication pre-initiation
R-HSA-5676590.split4	NIK-->noncanonical NF-kB signaling	9	8	SLED9.8	Phagocytosis, antigen processing and presentation	BCR downstream signaling, activation of NF-kB in B cells, non-canonical NF-kB siganling, DNA replication pre-initiation
R-HSA-69002.split6	DNA Replication Pre-Initiation	9	8	SLED9.8	Phagocytosis, antigen processing and presentation	BCR downstream signaling, activation of NF-kB in B cells, non-canonical NF-kB siganling, DNA replication pre-initiation
R-HSA-69541.split3	Stabilization of p53	9	8	SLED9.8	Phagocytosis, antigen processing and presentation	BCR downstream signaling, activation of NF-kB in B cells, non-canonical NF-kB siganling, DNA replication pre-initiation
R-HSA-69656.split2	Cyclin A:Cdk2-associated events at S phase entry	9	8	SLED9.8	Phagocytosis, antigen processing and presentation	BCR downstream signaling, activation of NF-kB in B cells, non-canonical NF-kB siganling, DNA replication pre-initiation
R-HSA-9604323.split3	Negative regulation of NOTCH4 signaling	9	8	SLED9.8	Phagocytosis, antigen processing and presentation	BCR downstream signaling, activation of NF-kB in B cells, non-canonical NF-kB siganling, DNA replication pre-initiation
R-HSA-9707587.split3	Regulation of HMOX1 expression and activity	9	8	SLED9.8	Phagocytosis, antigen processing and presentation	BCR downstream signaling, activation of NF-kB in B cells, non-canonical NF-kB siganling, DNA replication pre-initiation
LI.M5.0.split1	regulation of antigen presentation and immune response	10	1	SLED10.1	APCs, MHC-II	NK, DC and macrophage activation,regulation of TCR signaling and antigen presentation
LI.M43.1.split2	myeloid, dendritic cell activation via NFkB (II)	10	1	SLED10.1	APCs, MHC-II	NK, DC and macrophage activation,regulation of TCR signaling and antigen presentation
GO:0030101.split3	natural killer cell activation	10	1	SLED10.1	APCs, MHC-II	NK, DC and macrophage activation,regulation of TCR signaling and antigen presentation
GO:0043030.split1	regulation of macrophage activation	10	1	SLED10.1	APCs, MHC-II	NK, DC and macrophage activation,regulation of TCR signaling and antigen presentation
GO:0045664.split3	regulation of neuron differentiation	10	1	SLED10.1	APCs, MHC-II	NK, DC and macrophage activation,regulation of TCR signaling and antigen presentation
GO:0050862.split1	positive regulation of T cell receptor signaling pathway	10	1	SLED10.1	APCs, MHC-II	NK, DC and macrophage activation,regulation of TCR signaling and antigen presentation
GO:0004896.split4	cytokine receptor activity	10	1	SLED10.1	APCs, MHC-II	NK, DC and macrophage activation,regulation of TCR signaling and antigen presentation
GO:0038023.split8	signaling receptor activity	10	1	SLED10.1	APCs, MHC-II	NK, DC and macrophage activation,regulation of TCR signaling and antigen presentation
R-HSA-202733.split6	Cell surface interactions at the vascular wall	10	1	SLED10.1	APCs, MHC-II	NK, DC and macrophage activation,regulation of TCR signaling and antigen presentation
WP5115.split6	Network map of SARS-CoV-2 signaling pathway	10	1	SLED10.1	APCs, MHC-II	NK, DC and macrophage activation,regulation of TCR signaling and antigen presentation
NK_cells_NKT	NK_cells_NKT	10	1	SLED10.1	APCs, MHC-II	NK, DC and macrophage activation,regulation of TCR signaling and antigen presentation
LI.M28.split2	antigen presentation (lipids and proteins)	10	2	SLED10.2	APCs, MHC-II	Antigen processing and presentation, MHC-II, IFN gamma production, T-helper cell differentiation, B cell surface signature
LI.M71.split1	enriched in antigen presentation (I)	10	2	SLED10.2	APCs, MHC-II	Antigen processing and presentation, MHC-II, IFN gamma production, T-helper cell differentiation, B cell surface signature
LI.M95.0.split2	enriched in antigen presentation (II)	10	2	SLED10.2	APCs, MHC-II	Antigen processing and presentation, MHC-II, IFN gamma production, T-helper cell differentiation, B cell surface signature
LI.M200	antigen processing and presentation	10	2	SLED10.2	APCs, MHC-II	Antigen processing and presentation, MHC-II, IFN gamma production, T-helper cell differentiation, B cell surface signature
LI.S2.split8	B cell surface signature	10	2	SLED10.2	APCs, MHC-II	Antigen processing and presentation, MHC-II, IFN gamma production, T-helper cell differentiation, B cell surface signature
DC.M8.83.split2	Immune Responses	10	2	SLED10.2	APCs, MHC-II	Antigen processing and presentation, MHC-II, IFN gamma production, T-helper cell differentiation, B cell surface signature
GO:0019882.split1	antigen processing and presentation	10	2	SLED10.2	APCs, MHC-II	Antigen processing and presentation, MHC-II, IFN gamma production, T-helper cell differentiation, B cell surface signature
GO:0032729.split4	positive regulation of interferon-gamma production	10	2	SLED10.2	APCs, MHC-II	Antigen processing and presentation, MHC-II, IFN gamma production, T-helper cell differentiation, B cell surface signature
GO:0042102.split6	positive regulation of T cell proliferation	10	2	SLED10.2	APCs, MHC-II	Antigen processing and presentation, MHC-II, IFN gamma production, T-helper cell differentiation, B cell surface signature
GO:0045622	regulation of T-helper cell differentiation	10	2	SLED10.2	APCs, MHC-II	Antigen processing and presentation, MHC-II, IFN gamma production, T-helper cell differentiation, B cell surface signature
GO:0030658.split1	transport vesicle membrane	10	2	SLED10.2	APCs, MHC-II	Antigen processing and presentation, MHC-II, IFN gamma production, T-helper cell differentiation, B cell surface signature
GO:0030666.split1	endocytic vesicle membrane	10	2	SLED10.2	APCs, MHC-II	Antigen processing and presentation, MHC-II, IFN gamma production, T-helper cell differentiation, B cell surface signature
GO:0030669.split1	clathrin-coated endocytic vesicle membrane	10	2	SLED10.2	APCs, MHC-II	Antigen processing and presentation, MHC-II, IFN gamma production, T-helper cell differentiation, B cell surface signature
GO:0032588.split1	trans-Golgi network membrane	10	2	SLED10.2	APCs, MHC-II	Antigen processing and presentation, MHC-II, IFN gamma production, T-helper cell differentiation, B cell surface signature
GO:0023026.split3	MHC class II protein complex binding	10	2	SLED10.2	APCs, MHC-II	Antigen processing and presentation, MHC-II, IFN gamma production, T-helper cell differentiation, B cell surface signature
hsa04612.split4	Antigen processing and presentation	10	2	SLED10.2	APCs, MHC-II	Antigen processing and presentation, MHC-II, IFN gamma production, T-helper cell differentiation, B cell surface signature
hsa04658.split1	Th1 and Th2 cell differentiation	10	2	SLED10.2	APCs, MHC-II	Antigen processing and presentation, MHC-II, IFN gamma production, T-helper cell differentiation, B cell surface signature
hsa05310.split2	Asthma	10	2	SLED10.2	APCs, MHC-II	Antigen processing and presentation, MHC-II, IFN gamma production, T-helper cell differentiation, B cell surface signature
LI.M77.split4	collagen, TGFB family et al	10	3	SLED10.3	APCs, MHC-II	MHC-II antigen presentation, memory B cells, B cell proliferation, T cell activation, complement system
DC.M8.25.split2	Undetermined	10	3	SLED10.3	APCs, MHC-II	MHC-II antigen presentation, memory B cells, B cell proliferation, T cell activation, complement system
GO:0002250.split4	adaptive immune response	10	3	SLED10.3	APCs, MHC-II	MHC-II antigen presentation, memory B cells, B cell proliferation, T cell activation, complement system
GO:0030890.split2	positive regulation of B cell proliferation	10	3	SLED10.3	APCs, MHC-II	MHC-II antigen presentation, memory B cells, B cell proliferation, T cell activation, complement system
GO:0043410.split5	positive regulation of MAPK cascade	10	3	SLED10.3	APCs, MHC-II	MHC-II antigen presentation, memory B cells, B cell proliferation, T cell activation, complement system
GO:0050731.split2	positive regulation of peptidyl-tyrosine phosphorylation	10	3	SLED10.3	APCs, MHC-II	MHC-II antigen presentation, memory B cells, B cell proliferation, T cell activation, complement system
GO:0050870.split1	positive regulation of T cell activation	10	3	SLED10.3	APCs, MHC-II	MHC-II antigen presentation, memory B cells, B cell proliferation, T cell activation, complement system
GO:0005765.split2	lysosomal membrane	10	3	SLED10.3	APCs, MHC-II	MHC-II antigen presentation, memory B cells, B cell proliferation, T cell activation, complement system
GO:0005771.split3	multivesicular body	10	3	SLED10.3	APCs, MHC-II	MHC-II antigen presentation, memory B cells, B cell proliferation, T cell activation, complement system
GO:0010008.split1	endosome membrane	10	3	SLED10.3	APCs, MHC-II	MHC-II antigen presentation, memory B cells, B cell proliferation, T cell activation, complement system
R-HSA-2132295.split5	MHC class II antigen presentation	10	3	SLED10.3	APCs, MHC-II	MHC-II antigen presentation, memory B cells, B cell proliferation, T cell activation, complement system
hsa05145.split2	Toxoplasmosis	10	3	SLED10.3	APCs, MHC-II	MHC-II antigen presentation, memory B cells, B cell proliferation, T cell activation, complement system
WP2806.split3	Complement system	10	3	SLED10.3	APCs, MHC-II	MHC-II antigen presentation, memory B cells, B cell proliferation, T cell activation, complement system
WP4217.split1	Ebola virus pathway in host	10	3	SLED10.3	APCs, MHC-II	MHC-II antigen presentation, memory B cells, B cell proliferation, T cell activation, complement system
WP4298.split3	Acute viral myocarditis	10	3	SLED10.3	APCs, MHC-II	MHC-II antigen presentation, memory B cells, B cell proliferation, T cell activation, complement system
Memory_B_cells.split3	Memory_B_cells	10	3	SLED10.3	APCs, MHC-II	MHC-II antigen presentation, memory B cells, B cell proliferation, T cell activation, complement system
LI.M118.1.split2	enriched in monocytes (surface)	10	4	SLED10.4	APCs, MHC-II	Monocytes, macrophage differentiation, cytokines
DC.M4.14.split4	Monocytes	10	4	SLED10.4	APCs, MHC-II	Monocytes, macrophage differentiation, cytokines
GO:0030225.split2	macrophage differentiation	10	4	SLED10.4	APCs, MHC-II	Monocytes, macrophage differentiation, cytokines
GO:0033674.split2	positive regulation of kinase activity	10	4	SLED10.4	APCs, MHC-II	Monocytes, macrophage differentiation, cytokines
GO:0045058	T cell selection	10	4	SLED10.4	APCs, MHC-II	Monocytes, macrophage differentiation, cytokines
GO:0046325.split2	negative regulation of glucose import	10	4	SLED10.4	APCs, MHC-II	Monocytes, macrophage differentiation, cytokines
GO:0061098.split3	positive regulation of protein tyrosine kinase activity	10	4	SLED10.4	APCs, MHC-II	Monocytes, macrophage differentiation, cytokines
GO:0019955.split4	cytokine binding	10	4	SLED10.4	APCs, MHC-II	Monocytes, macrophage differentiation, cytokines
WP530.split4	Cytokines and inflammatory response	10	4	SLED10.4	APCs, MHC-II	Monocytes, macrophage differentiation, cytokines
DC.M5.5.split1	Undetermined	10	5	SLED10.5	APCs, MHC-II	Transcription, IFN-II, alpha-beta T cell differentiation, neutrophil chemotaxis
GO:0006351.split4	transcription, DNA-templated	10	5	SLED10.5	APCs, MHC-II	Transcription, IFN-II, alpha-beta T cell differentiation, neutrophil chemotaxis
GO:0006919.split5	activation of cysteine-type endopeptidase activity involved in apoptotic process	10	5	SLED10.5	APCs, MHC-II	Transcription, IFN-II, alpha-beta T cell differentiation, neutrophil chemotaxis
GO:0007000	nucleolus organization	10	5	SLED10.5	APCs, MHC-II	Transcription, IFN-II, alpha-beta T cell differentiation, neutrophil chemotaxis
GO:0007623.split1	circadian rhythm	10	5	SLED10.5	APCs, MHC-II	Transcription, IFN-II, alpha-beta T cell differentiation, neutrophil chemotaxis
GO:0008593.split2	regulation of Notch signaling pathway	10	5	SLED10.5	APCs, MHC-II	Transcription, IFN-II, alpha-beta T cell differentiation, neutrophil chemotaxis
GO:0009410.split6	response to xenobiotic stimulus	10	5	SLED10.5	APCs, MHC-II	Transcription, IFN-II, alpha-beta T cell differentiation, neutrophil chemotaxis
GO:0010628.split7	positive regulation of gene expression	10	5	SLED10.5	APCs, MHC-II	Transcription, IFN-II, alpha-beta T cell differentiation, neutrophil chemotaxis
GO:0032435.split2	negative regulation of proteasomal ubiquitin-dependent protein catabolic process	10	5	SLED10.5	APCs, MHC-II	Transcription, IFN-II, alpha-beta T cell differentiation, neutrophil chemotaxis
GO:0032869.split1	cellular response to insulin stimulus	10	5	SLED10.5	APCs, MHC-II	Transcription, IFN-II, alpha-beta T cell differentiation, neutrophil chemotaxis
GO:0042104.split1	positive regulation of activated T cell proliferation	10	5	SLED10.5	APCs, MHC-II	Transcription, IFN-II, alpha-beta T cell differentiation, neutrophil chemotaxis
GO:0042476.split3	odontogenesis	10	5	SLED10.5	APCs, MHC-II	Transcription, IFN-II, alpha-beta T cell differentiation, neutrophil chemotaxis
GO:0043066.split1	negative regulation of apoptotic process	10	5	SLED10.5	APCs, MHC-II	Transcription, IFN-II, alpha-beta T cell differentiation, neutrophil chemotaxis
GO:0043433.split6	negative regulation of DNA-binding transcription factor activity	10	5	SLED10.5	APCs, MHC-II	Transcription, IFN-II, alpha-beta T cell differentiation, neutrophil chemotaxis
GO:0045727.split3	positive regulation of translation	10	5	SLED10.5	APCs, MHC-II	Transcription, IFN-II, alpha-beta T cell differentiation, neutrophil chemotaxis
GO:0046632	alpha-beta T cell differentiation	10	5	SLED10.5	APCs, MHC-II	Transcription, IFN-II, alpha-beta T cell differentiation, neutrophil chemotaxis
GO:0050829.split4	defense response to Gram-negative bacterium	10	5	SLED10.5	APCs, MHC-II	Transcription, IFN-II, alpha-beta T cell differentiation, neutrophil chemotaxis
GO:0050830.split2	defense response to Gram-positive bacterium	10	5	SLED10.5	APCs, MHC-II	Transcription, IFN-II, alpha-beta T cell differentiation, neutrophil chemotaxis
GO:0070374.split3	positive regulation of ERK1 and ERK2 cascade	10	5	SLED10.5	APCs, MHC-II	Transcription, IFN-II, alpha-beta T cell differentiation, neutrophil chemotaxis
GO:0071320.split5	cellular response to cAMP	10	5	SLED10.5	APCs, MHC-II	Transcription, IFN-II, alpha-beta T cell differentiation, neutrophil chemotaxis
GO:0071456.split3	cellular response to hypoxia	10	5	SLED10.5	APCs, MHC-II	Transcription, IFN-II, alpha-beta T cell differentiation, neutrophil chemotaxis
GO:0090023.split1	positive regulation of neutrophil chemotaxis	10	5	SLED10.5	APCs, MHC-II	Transcription, IFN-II, alpha-beta T cell differentiation, neutrophil chemotaxis
GO:1990830.split4	cellular response to leukemia inhibitory factor	10	5	SLED10.5	APCs, MHC-II	Transcription, IFN-II, alpha-beta T cell differentiation, neutrophil chemotaxis
GO:0030496.split3	midbody	10	5	SLED10.5	APCs, MHC-II	Transcription, IFN-II, alpha-beta T cell differentiation, neutrophil chemotaxis
GO:0003684.split3	damaged DNA binding	10	5	SLED10.5	APCs, MHC-II	Transcription, IFN-II, alpha-beta T cell differentiation, neutrophil chemotaxis
GO:0003730.split2	mRNA 3'-UTR binding	10	5	SLED10.5	APCs, MHC-II	Transcription, IFN-II, alpha-beta T cell differentiation, neutrophil chemotaxis
GO:0016491.split5	oxidoreductase activity	10	5	SLED10.5	APCs, MHC-II	Transcription, IFN-II, alpha-beta T cell differentiation, neutrophil chemotaxis
GO:0045296.split4	cadherin binding	10	5	SLED10.5	APCs, MHC-II	Transcription, IFN-II, alpha-beta T cell differentiation, neutrophil chemotaxis
R-HSA-3371497.split3	HSP90 chaperone cycle for steroid hormone receptors (SHR) in the presence of ligand	10	5	SLED10.5	APCs, MHC-II	Transcription, IFN-II, alpha-beta T cell differentiation, neutrophil chemotaxis
R-HSA-8856825.split4	Cargo recognition for clathrin-mediated endocytosis	10	5	SLED10.5	APCs, MHC-II	Transcription, IFN-II, alpha-beta T cell differentiation, neutrophil chemotaxis
hsa04022.split8	cGMP-PKG signaling pathway	10	5	SLED10.5	APCs, MHC-II	Transcription, IFN-II, alpha-beta T cell differentiation, neutrophil chemotaxis
hsa04924.split5	Renin secretion	10	5	SLED10.5	APCs, MHC-II	Transcription, IFN-II, alpha-beta T cell differentiation, neutrophil chemotaxis
WP2431.split2	Spinal cord injury	10	5	SLED10.5	APCs, MHC-II	Transcription, IFN-II, alpha-beta T cell differentiation, neutrophil chemotaxis
WP2877.split7	Vitamin D receptor pathway	10	5	SLED10.5	APCs, MHC-II	Transcription, IFN-II, alpha-beta T cell differentiation, neutrophil chemotaxis
WP4336.split6	ncRNAs involved in Wnt signaling in hepatocellular carcinoma	10	5	SLED10.5	APCs, MHC-II	Transcription, IFN-II, alpha-beta T cell differentiation, neutrophil chemotaxis
IFN_II.split10	IFN_II	10	5	SLED10.5	APCs, MHC-II	Transcription, IFN-II, alpha-beta T cell differentiation, neutrophil chemotaxis
M14.23.split3	Gene transcription	10	5	SLED10.5	APCs, MHC-II	Transcription, IFN-II, alpha-beta T cell differentiation, neutrophil chemotaxis
M14.43.split2	TBD	10	5	SLED10.5	APCs, MHC-II	Transcription, IFN-II, alpha-beta T cell differentiation, neutrophil chemotaxis
M14.64.split2	Cell cycle	10	5	SLED10.5	APCs, MHC-II	Transcription, IFN-II, alpha-beta T cell differentiation, neutrophil chemotaxis
M15.82.split2	TBD	10	5	SLED10.5	APCs, MHC-II	Transcription, IFN-II, alpha-beta T cell differentiation, neutrophil chemotaxis
DC.M7.5.split6	Undetermined	10	6	SLED10.6	APCs, MHC-II	CD4 Tcm, RNA processing and catabolic process
DC.M8.64.split1	Undetermined	10	6	SLED10.6	APCs, MHC-II	CD4 Tcm, RNA processing and catabolic process
GO:0003091.split3	renal water homeostasis	10	6	SLED10.6	APCs, MHC-II	CD4 Tcm, RNA processing and catabolic process
GO:0006396.split3	RNA processing	10	6	SLED10.6	APCs, MHC-II	CD4 Tcm, RNA processing and catabolic process
GO:0006401.split1	RNA catabolic process	10	6	SLED10.6	APCs, MHC-II	CD4 Tcm, RNA processing and catabolic process
GO:0006508.split7	proteolysis	10	6	SLED10.6	APCs, MHC-II	CD4 Tcm, RNA processing and catabolic process
GO:0006626.split1	protein targeting to mitochondrion	10	6	SLED10.6	APCs, MHC-II	CD4 Tcm, RNA processing and catabolic process
GO:0007409.split3	axonogenesis	10	6	SLED10.6	APCs, MHC-II	CD4 Tcm, RNA processing and catabolic process
GO:0016226.split1	iron-sulfur cluster assembly	10	6	SLED10.6	APCs, MHC-II	CD4 Tcm, RNA processing and catabolic process
GO:0021987.split1	cerebral cortex development	10	6	SLED10.6	APCs, MHC-II	CD4 Tcm, RNA processing and catabolic process
GO:0034644.split1	cellular response to UV	10	6	SLED10.6	APCs, MHC-II	CD4 Tcm, RNA processing and catabolic process
GO:0043523.split2	regulation of neuron apoptotic process	10	6	SLED10.6	APCs, MHC-II	CD4 Tcm, RNA processing and catabolic process
GO:0045893.split4	positive regulation of transcription, DNA-templated	10	6	SLED10.6	APCs, MHC-II	CD4 Tcm, RNA processing and catabolic process
GO:1900745.split2	positive regulation of p38MAPK cascade	10	6	SLED10.6	APCs, MHC-II	CD4 Tcm, RNA processing and catabolic process
GO:2001244.split4	positive regulation of intrinsic apoptotic signaling pathway	10	6	SLED10.6	APCs, MHC-II	CD4 Tcm, RNA processing and catabolic process
GO:0000176.split2	nuclear exosome (RNase complex)	10	6	SLED10.6	APCs, MHC-II	CD4 Tcm, RNA processing and catabolic process
GO:0005730.split2	nucleolus	10	6	SLED10.6	APCs, MHC-II	CD4 Tcm, RNA processing and catabolic process
GO:0032991.split1	protein-containing complex	10	6	SLED10.6	APCs, MHC-II	CD4 Tcm, RNA processing and catabolic process
GO:0033588	elongator holoenzyme complex	10	6	SLED10.6	APCs, MHC-II	CD4 Tcm, RNA processing and catabolic process
GO:0045202.split5	synapse	10	6	SLED10.6	APCs, MHC-II	CD4 Tcm, RNA processing and catabolic process
GO:0071001	U4/U6 snRNP	10	6	SLED10.6	APCs, MHC-II	CD4 Tcm, RNA processing and catabolic process
GO:0071013.split5	catalytic step 2 spliceosome	10	6	SLED10.6	APCs, MHC-II	CD4 Tcm, RNA processing and catabolic process
GO:1990904.split1	ribonucleoprotein complex	10	6	SLED10.6	APCs, MHC-II	CD4 Tcm, RNA processing and catabolic process
GO:0005507.split5	copper ion binding	10	6	SLED10.6	APCs, MHC-II	CD4 Tcm, RNA processing and catabolic process
GO:0016853.split9	isomerase activity	10	6	SLED10.6	APCs, MHC-II	CD4 Tcm, RNA processing and catabolic process
GO:0060090.split6	molecular adaptor activity	10	6	SLED10.6	APCs, MHC-II	CD4 Tcm, RNA processing and catabolic process
GO:0140297.split1	DNA-binding transcription factor binding	10	6	SLED10.6	APCs, MHC-II	CD4 Tcm, RNA processing and catabolic process
R-HSA-203927.split3	MicroRNA (miRNA) biogenesis	10	6	SLED10.6	APCs, MHC-II	CD4 Tcm, RNA processing and catabolic process
R-HSA-3214815.split3	HDACs deacetylate histones	10	6	SLED10.6	APCs, MHC-II	CD4 Tcm, RNA processing and catabolic process
R-HSA-3214858.split1	RMTs methylate histone arginines	10	6	SLED10.6	APCs, MHC-II	CD4 Tcm, RNA processing and catabolic process
R-HSA-450531.split3	Regulation of mRNA stability by proteins that bind AU-rich elements	10	6	SLED10.6	APCs, MHC-II	CD4 Tcm, RNA processing and catabolic process
R-HSA-5633007.split6	Regulation of TP53 Activity	10	6	SLED10.6	APCs, MHC-II	CD4 Tcm, RNA processing and catabolic process
R-HSA-5663202.split7	Diseases of signal transduction by growth factor receptors and second messengers	10	6	SLED10.6	APCs, MHC-II	CD4 Tcm, RNA processing and catabolic process
R-HSA-73933.split1	Resolution of Abasic Sites (AP sites)	10	6	SLED10.6	APCs, MHC-II	CD4 Tcm, RNA processing and catabolic process
R-HSA-9018519.split2	Estrogen-dependent gene expression	10	6	SLED10.6	APCs, MHC-II	CD4 Tcm, RNA processing and catabolic process
R-HSA-9679191.split2	Potential therapeutics for SARS	10	6	SLED10.6	APCs, MHC-II	CD4 Tcm, RNA processing and catabolic process
hsa00510.split3	N-Glycan biosynthesis	10	6	SLED10.6	APCs, MHC-II	CD4 Tcm, RNA processing and catabolic process
hsa00561.split4	Glycerolipid metabolism	10	6	SLED10.6	APCs, MHC-II	CD4 Tcm, RNA processing and catabolic process
hsa05166.split5	Human T-cell leukemia virus 1 infection	10	6	SLED10.6	APCs, MHC-II	CD4 Tcm, RNA processing and catabolic process
CD4pos_Tcm.split3	CD4pos_Tcm	10	6	SLED10.6	APCs, MHC-II	CD4 Tcm, RNA processing and catabolic process
DC.M9.9.split3	Undetermined	10	7	SLED10.7	APCs, MHC-II	mRNA transport
GO:0000184.split2	nuclear-transcribed mRNA catabolic process, nonsense-mediated decay	10	7	SLED10.7	APCs, MHC-II	mRNA transport
GO:0006337.split2	nucleosome disassembly	10	7	SLED10.7	APCs, MHC-II	mRNA transport
GO:0007041.split1	lysosomal transport	10	7	SLED10.7	APCs, MHC-II	mRNA transport
GO:0045595.split2	regulation of cell differentiation	10	7	SLED10.7	APCs, MHC-II	mRNA transport
GO:0046685.split2	response to arsenic-containing substance	10	7	SLED10.7	APCs, MHC-II	mRNA transport
GO:0001650.split8	fibrillar center	10	7	SLED10.7	APCs, MHC-II	mRNA transport
GO:0016328.split7	lateral plasma membrane	10	7	SLED10.7	APCs, MHC-II	mRNA transport
GO:0016514.split3	SWI/SNF complex	10	7	SLED10.7	APCs, MHC-II	mRNA transport
GO:0031519.split2	PcG protein complex	10	7	SLED10.7	APCs, MHC-II	mRNA transport
GO:0008375.split3	acetylglucosaminyltransferase activity	10	7	SLED10.7	APCs, MHC-II	mRNA transport
GO:0017056.split3	structural constituent of nuclear pore	10	7	SLED10.7	APCs, MHC-II	mRNA transport
GO:0035925.split3	mRNA 3'-UTR AU-rich region binding	10	7	SLED10.7	APCs, MHC-II	mRNA transport
R-HSA-159230.split1	Transport of the SLBP Dependant Mature mRNA	10	7	SLED10.7	APCs, MHC-II	mRNA transport
R-HSA-177243.split1	Interactions of Rev with host cellular proteins	10	7	SLED10.7	APCs, MHC-II	mRNA transport
R-HSA-1912420.split2	Pre-NOTCH Processing in Golgi	10	7	SLED10.7	APCs, MHC-II	mRNA transport
R-HSA-211000.split1	Gene Silencing by RNA	10	7	SLED10.7	APCs, MHC-II	mRNA transport
R-HSA-389513.split2	CTLA4 inhibitory signaling	10	7	SLED10.7	APCs, MHC-II	mRNA transport
R-HSA-8939243.split5	RUNX1 interacts with co-factors whose precise effect on RUNX1 targets is not known	10	7	SLED10.7	APCs, MHC-II	mRNA transport
WP4204.split4	Tumor suppressor activity of SMARCB1	10	7	SLED10.7	APCs, MHC-II	mRNA transport
M15.46.split2	TBD	10	7	SLED10.7	APCs, MHC-II	mRNA transport
GO:0000375.split3	RNA splicing, via transesterification reactions	10	8	SLED10.8	APCs, MHC-II	Cellular response to oxidative stress, senescence
GO:0001933.split1	negative regulation of protein phosphorylation	10	8	SLED10.8	APCs, MHC-II	Cellular response to oxidative stress, senescence
GO:0002026.split1	regulation of the force of heart contraction	10	8	SLED10.8	APCs, MHC-II	Cellular response to oxidative stress, senescence
GO:0007004.split1	telomere maintenance via telomerase	10	8	SLED10.8	APCs, MHC-II	Cellular response to oxidative stress, senescence
GO:0008202.split2	steroid metabolic process	10	8	SLED10.8	APCs, MHC-II	Cellular response to oxidative stress, senescence
GO:0008217.split1	regulation of blood pressure	10	8	SLED10.8	APCs, MHC-II	Cellular response to oxidative stress, senescence
GO:0030833.split3	regulation of actin filament polymerization	10	8	SLED10.8	APCs, MHC-II	Cellular response to oxidative stress, senescence
GO:0032092.split2	positive regulation of protein binding	10	8	SLED10.8	APCs, MHC-II	Cellular response to oxidative stress, senescence
GO:0032516.split1	positive regulation of phosphoprotein phosphatase activity	10	8	SLED10.8	APCs, MHC-II	Cellular response to oxidative stress, senescence
GO:0034599.split1	cellular response to oxidative stress	10	8	SLED10.8	APCs, MHC-II	Cellular response to oxidative stress, senescence
GO:0043518.split1	negative regulation of DNA damage response, signal transduction by p53 class mediator	10	8	SLED10.8	APCs, MHC-II	Cellular response to oxidative stress, senescence
GO:0050730.split2	regulation of peptidyl-tyrosine phosphorylation	10	8	SLED10.8	APCs, MHC-II	Cellular response to oxidative stress, senescence
GO:0071383.split2	cellular response to steroid hormone stimulus	10	8	SLED10.8	APCs, MHC-II	Cellular response to oxidative stress, senescence
GO:0071732.split2	cellular response to nitric oxide	10	8	SLED10.8	APCs, MHC-II	Cellular response to oxidative stress, senescence
GO:0005956	protein kinase CK2 complex	10	8	SLED10.8	APCs, MHC-II	Cellular response to oxidative stress, senescence
GO:0015030.split4	Cajal body	10	8	SLED10.8	APCs, MHC-II	Cellular response to oxidative stress, senescence
GO:0001046.split1	core promoter sequence-specific DNA binding	10	8	SLED10.8	APCs, MHC-II	Cellular response to oxidative stress, senescence
GO:0043548.split1	phosphatidylinositol 3-kinase binding	10	8	SLED10.8	APCs, MHC-II	Cellular response to oxidative stress, senescence
R-HSA-1483191.split2	Synthesis of PC	10	8	SLED10.8	APCs, MHC-II	Cellular response to oxidative stress, senescence
R-HSA-1655829.split3	Regulation of cholesterol biosynthesis by SREBP (SREBF)	10	8	SLED10.8	APCs, MHC-II	Cellular response to oxidative stress, senescence
R-HSA-3371511.split1	HSF1 activation	10	8	SLED10.8	APCs, MHC-II	Cellular response to oxidative stress, senescence
R-HSA-375165.split4	NCAM signaling for neurite out-growth	10	8	SLED10.8	APCs, MHC-II	Cellular response to oxidative stress, senescence
hsa04218.split5	Cellular senescence	10	8	SLED10.8	APCs, MHC-II	Cellular response to oxidative stress, senescence
hsa04260.split4	Cardiac muscle contraction	10	8	SLED10.8	APCs, MHC-II	Cellular response to oxidative stress, senescence
WP2875.split2	Constitutive androstane receptor pathway	10	8	SLED10.8	APCs, MHC-II	Cellular response to oxidative stress, senescence
WP3286.split5	Copper homeostasis	10	8	SLED10.8	APCs, MHC-II	Cellular response to oxidative stress, senescence
WP4258.split6	lncRNA in canonical Wnt signaling and colorectal cancer	10	8	SLED10.8	APCs, MHC-II	Cellular response to oxidative stress, senescence
M15.71.split3	TBD	10	8	SLED10.8	APCs, MHC-II	Cellular response to oxidative stress, senescence
GO:0002183.split2	cytoplasmic translational initiation	10	9	SLED10.9	APCs, MHC-II	Translation initiation
GO:1902166.split1	negative regulation of intrinsic apoptotic signaling pathway in response to DNA damage by p53 class mediator	10	9	SLED10.9	APCs, MHC-II	Translation initiation
GO:0016281.split1	eukaryotic translation initiation factor 4F complex	10	9	SLED10.9	APCs, MHC-II	Translation initiation
GO:0034774.split1	secretory granule lumen	10	9	SLED10.9	APCs, MHC-II	Translation initiation
GO:0050661.split5	NADP binding	10	9	SLED10.9	APCs, MHC-II	Translation initiation
GO:0140492.split2	metal-dependent deubiquitinase activity	10	9	SLED10.9	APCs, MHC-II	Translation initiation
R-HSA-83936.split2	Transport of nucleosides and free purine and pyrimidine bases across the plasma membrane	10	9	SLED10.9	APCs, MHC-II	Translation initiation
GO:0006388.split2	tRNA splicing, via endonucleolytic cleavage and ligation	10	10	SLED10.10	APCs, MHC-II	Translation initiation and elongation
GO:0010629.split2	negative regulation of gene expression	10	10	SLED10.10	APCs, MHC-II	Translation initiation and elongation
GO:0044597.split1	daunorubicin metabolic process	10	10	SLED10.10	APCs, MHC-II	Translation initiation and elongation
GO:0050890.split2	cognition	10	10	SLED10.10	APCs, MHC-II	Translation initiation and elongation
GO:0001652	granular component	10	10	SLED10.10	APCs, MHC-II	Translation initiation and elongation
GO:0101031.split1	chaperone complex	10	10	SLED10.10	APCs, MHC-II	Translation initiation and elongation
GO:0001540.split7	amyloid-beta binding	10	10	SLED10.10	APCs, MHC-II	Translation initiation and elongation
GO:0070181	small ribosomal subunit rRNA binding	10	10	SLED10.10	APCs, MHC-II	Translation initiation and elongation
R-HSA-8949664.split3	Processing of SMDT1	10	10	SLED10.10	APCs, MHC-II	Translation initiation and elongation
M14.12.split2	Cell cycle	10	10	SLED10.10	APCs, MHC-II	Translation initiation and elongation
GO:0006400.split4	tRNA modification	10	11	SLED10.11	APCs, MHC-II	Transcription, translation, CLP, IL12 signaling
GO:0006446.split1	regulation of translational initiation	10	11	SLED10.11	APCs, MHC-II	Transcription, translation, CLP, IL12 signaling
GO:0010951.split6	negative regulation of endopeptidase activity	10	11	SLED10.11	APCs, MHC-II	Transcription, translation, CLP, IL12 signaling
GO:0019216.split3	regulation of lipid metabolic process	10	11	SLED10.11	APCs, MHC-II	Transcription, translation, CLP, IL12 signaling
GO:0032689.split1	negative regulation of interferon-gamma production	10	11	SLED10.11	APCs, MHC-II	Transcription, translation, CLP, IL12 signaling
GO:0070301.split5	cellular response to hydrogen peroxide	10	11	SLED10.11	APCs, MHC-II	Transcription, translation, CLP, IL12 signaling
GO:1901796.split4	regulation of signal transduction by p53 class mediator	10	11	SLED10.11	APCs, MHC-II	Transcription, translation, CLP, IL12 signaling
GO:2000059.split2	negative regulation of ubiquitin-dependent protein catabolic process	10	11	SLED10.11	APCs, MHC-II	Transcription, translation, CLP, IL12 signaling
GO:0005740.split2	mitochondrial envelope	10	11	SLED10.11	APCs, MHC-II	Transcription, translation, CLP, IL12 signaling
GO:0098793.split3	presynapse	10	11	SLED10.11	APCs, MHC-II	Transcription, translation, CLP, IL12 signaling
GO:0005080.split1	protein kinase C binding	10	11	SLED10.11	APCs, MHC-II	Transcription, translation, CLP, IL12 signaling
GO:0031369.split3	translation initiation factor binding	10	11	SLED10.11	APCs, MHC-II	Transcription, translation, CLP, IL12 signaling
R-HSA-447115.split4	Interleukin-12 family signaling	10	11	SLED10.11	APCs, MHC-II	Transcription, translation, CLP, IL12 signaling
M13.2.split1	Gene transcription	10	11	SLED10.11	APCs, MHC-II	Transcription, translation, CLP, IL12 signaling
M15.51.split2	Protein synthesis	10	11	SLED10.11	APCs, MHC-II	Transcription, translation, CLP, IL12 signaling
CLP.split2	CLP	10	11	SLED10.11	APCs, MHC-II	Transcription, translation, CLP, IL12 signaling
MPP.split8	MPP	10	11	SLED10.11	APCs, MHC-II	Transcription, translation, CLP, IL12 signaling
GO:0007569.split1	cell aging	10	12	SLED10.12	APCs, MHC-II	Protein folding, IL12 signaling, monocytes
GO:0021766.split5	hippocampus development	10	12	SLED10.12	APCs, MHC-II	Protein folding, IL12 signaling, monocytes
GO:0031397.split6	negative regulation of protein ubiquitination	10	12	SLED10.12	APCs, MHC-II	Protein folding, IL12 signaling, monocytes
GO:0032212.split1	positive regulation of telomere maintenance via telomerase	10	12	SLED10.12	APCs, MHC-II	Protein folding, IL12 signaling, monocytes
GO:0042274.split1	ribosomal small subunit biogenesis	10	12	SLED10.12	APCs, MHC-II	Protein folding, IL12 signaling, monocytes
GO:0045471.split5	response to ethanol	10	12	SLED10.12	APCs, MHC-II	Protein folding, IL12 signaling, monocytes
GO:0048254	snoRNA localization	10	12	SLED10.12	APCs, MHC-II	Protein folding, IL12 signaling, monocytes
GO:0050821.split2	protein stabilization	10	12	SLED10.12	APCs, MHC-II	Protein folding, IL12 signaling, monocytes
GO:0051085.split3	chaperone cofactor-dependent protein refolding	10	12	SLED10.12	APCs, MHC-II	Protein folding, IL12 signaling, monocytes
GO:0051973.split1	positive regulation of telomerase activity	10	12	SLED10.12	APCs, MHC-II	Protein folding, IL12 signaling, monocytes
GO:0070131.split1	positive regulation of mitochondrial translation	10	12	SLED10.12	APCs, MHC-II	Protein folding, IL12 signaling, monocytes
GO:0090666	scaRNA localization to Cajal body	10	12	SLED10.12	APCs, MHC-II	Protein folding, IL12 signaling, monocytes
GO:1904871.split2	positive regulation of protein localization to Cajal body	10	12	SLED10.12	APCs, MHC-II	Protein folding, IL12 signaling, monocytes
GO:0005763.split1	mitochondrial small ribosomal subunit	10	12	SLED10.12	APCs, MHC-II	Protein folding, IL12 signaling, monocytes
GO:0032040.split3	small-subunit processome	10	12	SLED10.12	APCs, MHC-II	Protein folding, IL12 signaling, monocytes
GO:0034457	Mpp10 complex	10	12	SLED10.12	APCs, MHC-II	Protein folding, IL12 signaling, monocytes
GO:0042645.split4	mitochondrial nucleoid	10	12	SLED10.12	APCs, MHC-II	Protein folding, IL12 signaling, monocytes
GO:0044297.split3	cell body	10	12	SLED10.12	APCs, MHC-II	Protein folding, IL12 signaling, monocytes
GO:0044183.split1	protein folding chaperone	10	12	SLED10.12	APCs, MHC-II	Protein folding, IL12 signaling, monocytes
GO:0051059.split1	NF-kappaB binding	10	12	SLED10.12	APCs, MHC-II	Protein folding, IL12 signaling, monocytes
GO:0051087.split1	chaperone binding	10	12	SLED10.12	APCs, MHC-II	Protein folding, IL12 signaling, monocytes
GO:0051117.split3	ATPase binding	10	12	SLED10.12	APCs, MHC-II	Protein folding, IL12 signaling, monocytes
R-HSA-390471.split2	Association of TriC/CCT with target proteins during biosynthesis	10	12	SLED10.12	APCs, MHC-II	Protein folding, IL12 signaling, monocytes
R-HSA-391251.split5	Protein folding	10	12	SLED10.12	APCs, MHC-II	Protein folding, IL12 signaling, monocytes
R-HSA-5389840.split1	Mitochondrial translation elongation	10	12	SLED10.12	APCs, MHC-II	Protein folding, IL12 signaling, monocytes
R-HSA-6790901.split1	rRNA modification in the nucleus and cytosol	10	12	SLED10.12	APCs, MHC-II	Protein folding, IL12 signaling, monocytes
R-HSA-6814122.split4	Cooperation of PDCL (PhLP1) and TRiC/CCT in G-protein beta folding	10	12	SLED10.12	APCs, MHC-II	Protein folding, IL12 signaling, monocytes
R-HSA-8950505.split3	Gene and protein expression by JAK-STAT signaling after Interleukin-12 stimulation	10	12	SLED10.12	APCs, MHC-II	Protein folding, IL12 signaling, monocytes
R-HSA-9020591.split3	Interleukin-12 signaling	10	12	SLED10.12	APCs, MHC-II	Protein folding, IL12 signaling, monocytes
M16.40.split2	Monocytes	10	12	SLED10.12	APCs, MHC-II	Protein folding, IL12 signaling, monocytes
GO:0010466.split8	negative regulation of peptidase activity	10	13	SLED10.13	APCs, MHC-II	Transcription
GO:0035552	oxidative single-stranded DNA demethylation	10	13	SLED10.13	APCs, MHC-II	Transcription
M14.77.split1	Gene transcription	10	13	SLED10.13	APCs, MHC-II	Transcription
R-HSA-167158.split4	Formation of the HIV-1 Early Elongation Complex	10	14	SLED10.14	APCs, MHC-II	Tat-mediated HIV elongation
R-HSA-167200.split4	Formation of HIV-1 elongation complex containing HIV-1 Tat	10	14	SLED10.14	APCs, MHC-II	Tat-mediated HIV elongation
R-HSA-167238.split4	Pausing and recovery of Tat-mediated HIV elongation	10	14	SLED10.14	APCs, MHC-II	Tat-mediated HIV elongation
R-HSA-167242.split2	Abortive elongation of HIV-1 transcript in the absence of Tat	10	14	SLED10.14	APCs, MHC-II	Tat-mediated HIV elongation
LI.M7.0.split2	enriched in T cells (I)	11	1	SLED11.1	Cytotoxic T and NK cells	CD8 Tcm, cytotoxic T cells, NK cells, Tgd cells, basophils, allograpft rejection
LI.M7.2.split1	enriched in NK cells (I)	11	1	SLED11.1	Cytotoxic T and NK cells	CD8 Tcm, cytotoxic T cells, NK cells, Tgd cells, basophils, allograpft rejection
LI.S1.split3	NK cell surface signature	11	1	SLED11.1	Cytotoxic T and NK cells	CD8 Tcm, cytotoxic T cells, NK cells, Tgd cells, basophils, allograpft rejection
DC.M3.6.split1	Cytotoxic/NK Cell	11	1	SLED11.1	Cytotoxic T and NK cells	CD8 Tcm, cytotoxic T cells, NK cells, Tgd cells, basophils, allograpft rejection
GO:0019835.split2	cytolysis	11	1	SLED11.1	Cytotoxic T and NK cells	CD8 Tcm, cytotoxic T cells, NK cells, Tgd cells, basophils, allograpft rejection
GO:0051603.split1	proteolysis involved in cellular protein catabolic process	11	1	SLED11.1	Cytotoxic T and NK cells	CD8 Tcm, cytotoxic T cells, NK cells, Tgd cells, basophils, allograpft rejection
GO:0043235.split12	receptor complex	11	1	SLED11.1	Cytotoxic T and NK cells	CD8 Tcm, cytotoxic T cells, NK cells, Tgd cells, basophils, allograpft rejection
GO:0008236.split6	serine-type peptidase activity	11	1	SLED11.1	Cytotoxic T and NK cells	CD8 Tcm, cytotoxic T cells, NK cells, Tgd cells, basophils, allograpft rejection
hsa05330.split3	Allograft rejection	11	1	SLED11.1	Cytotoxic T and NK cells	CD8 Tcm, cytotoxic T cells, NK cells, Tgd cells, basophils, allograpft rejection
WP2328.split7	Allograft Rejection	11	1	SLED11.1	Cytotoxic T and NK cells	CD8 Tcm, cytotoxic T cells, NK cells, Tgd cells, basophils, allograpft rejection
M9.1.split2	Cytotoxic lymphocytes	11	1	SLED11.1	Cytotoxic T and NK cells	CD8 Tcm, cytotoxic T cells, NK cells, Tgd cells, basophils, allograpft rejection
M13.21.split2	Cytotoxic lymphocytes	11	1	SLED11.1	Cytotoxic T and NK cells	CD8 Tcm, cytotoxic T cells, NK cells, Tgd cells, basophils, allograpft rejection
Basophils.split8	Basophils	11	1	SLED11.1	Cytotoxic T and NK cells	CD8 Tcm, cytotoxic T cells, NK cells, Tgd cells, basophils, allograpft rejection
CD8pos_Tcm.split5	CD8pos_Tcm	11	1	SLED11.1	Cytotoxic T and NK cells	CD8 Tcm, cytotoxic T cells, NK cells, Tgd cells, basophils, allograpft rejection
NK_cells.split1	NK_cells	11	1	SLED11.1	Cytotoxic T and NK cells	CD8 Tcm, cytotoxic T cells, NK cells, Tgd cells, basophils, allograpft rejection
Tgd_cells.split3	Tgd_cells	11	1	SLED11.1	Cytotoxic T and NK cells	CD8 Tcm, cytotoxic T cells, NK cells, Tgd cells, basophils, allograpft rejection
LI.M7.2.split2	enriched in NK cells (I)	11	2	SLED11.2	Cytotoxic T and NK cells	CD8 T cells, NK cell mediated cytotoxicity
GO:0001708.split3	cell fate specification	11	2	SLED11.2	Cytotoxic T and NK cells	CD8 T cells, NK cell mediated cytotoxicity
GO:0045954.split2	positive regulation of natural killer cell mediated cytotoxicity	11	2	SLED11.2	Cytotoxic T and NK cells	CD8 T cells, NK cell mediated cytotoxicity
R-HSA-198933.split4	Immunoregulatory interactions between a Lymphoid and a non-Lymphoid cell	11	2	SLED11.2	Cytotoxic T and NK cells	CD8 T cells, NK cell mediated cytotoxicity
WP4816.split7	TGF-beta receptor signaling in skeletal dysplasias	11	2	SLED11.2	Cytotoxic T and NK cells	CD8 T cells, NK cell mediated cytotoxicity
CD8pos_T_cells.split1	CD8pos_T_cells	11	2	SLED11.2	Cytotoxic T and NK cells	CD8 T cells, NK cell mediated cytotoxicity
LI.M61.0.split1	enriched in NK cells (II)	11	3	SLED11.3	Cytotoxic T and NK cells	NK cells, immunological synapse formation
GO:0001771.split1	immunological synapse formation	11	3	SLED11.3	Cytotoxic T and NK cells	NK cells, immunological synapse formation
GO:0007189.split6	adenylate cyclase-activating G protein-coupled receptor signaling pathway	11	3	SLED11.3	Cytotoxic T and NK cells	NK cells, immunological synapse formation
GO:0050680.split7	negative regulation of epithelial cell proliferation	11	3	SLED11.3	Cytotoxic T and NK cells	NK cells, immunological synapse formation
GO:0030165.split7	PDZ domain binding	11	3	SLED11.3	Cytotoxic T and NK cells	NK cells, immunological synapse formation
GO:0043014.split3	alpha-tubulin binding	11	3	SLED11.3	Cytotoxic T and NK cells	NK cells, immunological synapse formation
hsa04080.split5	Neuroactive ligand-receptor interaction	11	3	SLED11.3	Cytotoxic T and NK cells	NK cells, immunological synapse formation
WP247.split2	Small ligand GPCRs	11	3	SLED11.3	Cytotoxic T and NK cells	NK cells, immunological synapse formation
LI.M130.split1	enriched in G-protein coupled receptors	11	4	SLED11.4	Cytotoxic T and NK cells	T cells, GPCR activity
LI.M223.split2	enriched in T cells (II)	11	4	SLED11.4	Cytotoxic T and NK cells	T cells, GPCR activity
GO:0006968.split2	cellular defense response	11	4	SLED11.4	Cytotoxic T and NK cells	T cells, GPCR activity
GO:0004888.split8	transmembrane signaling receptor activity	11	4	SLED11.4	Cytotoxic T and NK cells	T cells, GPCR activity
GO:0004930.split5	G protein-coupled receptor activity	11	4	SLED11.4	Cytotoxic T and NK cells	T cells, GPCR activity
R-HSA-373076.split13	Class A/1 (Rhodopsin-like receptors)	11	4	SLED11.4	Cytotoxic T and NK cells	T cells, GPCR activity
R-HSA-500792.split12	GPCR ligand binding	11	4	SLED11.4	Cytotoxic T and NK cells	T cells, GPCR activity
M9.1.split1	Cytotoxic lymphocytes	11	4	SLED11.4	Cytotoxic T and NK cells	T cells, GPCR activity
LI.S1.split4	NK cell surface signature	11	5	SLED11.5	Cytotoxic T and NK cells	Cytotoxic NK cells
DC.M8.46.split1	Cytotoxic/NK	11	5	SLED11.5	Cytotoxic T and NK cells	Cytotoxic NK cells
DC.M3.6.split2	Cytotoxic/NK Cell	11	6	SLED11.6	Cytotoxic T and NK cells	Cytotoxic T cells, NK cells, mast cell degranulation
DC.M8.56.split2	Undetermined	11	6	SLED11.6	Cytotoxic T and NK cells	Cytotoxic T cells, NK cells, mast cell degranulation
GO:0043303.split1	mast cell degranulation	11	6	SLED11.6	Cytotoxic T and NK cells	Cytotoxic T cells, NK cells, mast cell degranulation
WP4719.split3	Eicosanoid metabolism via cyclooxygenases (COX)	11	6	SLED11.6	Cytotoxic T and NK cells	Cytotoxic T cells, NK cells, mast cell degranulation
M13.21.split1	Cytotoxic lymphocytes	11	6	SLED11.6	Cytotoxic T and NK cells	Cytotoxic T cells, NK cells, mast cell degranulation
NK_cells.split3	NK_cells	11	6	SLED11.6	Cytotoxic T and NK cells	Cytotoxic T cells, NK cells, mast cell degranulation
GO:0002548.split1	monocyte chemotaxis	11	7	SLED11.7	Cytotoxic T and NK cells	Monocyte chemotaxis
GO:0016004.split1	phospholipase activator activity	11	7	SLED11.7	Cytotoxic T and NK cells	Monocyte chemotaxis
GO:0007159.split4	leukocyte cell-cell adhesion	11	8	SLED11.8	Cytotoxic T and NK cells	Cytokine and chemokine activity
GO:0004950.split4	chemokine receptor activity	11	8	SLED11.8	Cytotoxic T and NK cells	Cytokine and chemokine activity
GO:0005125.split16	cytokine activity	11	8	SLED11.8	Cytotoxic T and NK cells	Cytokine and chemokine activity
GO:0015026.split4	coreceptor activity	11	8	SLED11.8	Cytotoxic T and NK cells	Cytokine and chemokine activity
LI.M10.1.split2	E2F1 targets (Q4)	12	1	SLED12.1	Oxidative phosphorylation, mitochondrial respiration and proteolysis	DNA replication and repair
LI.M22.1.split1	mismatch repair (II)	12	1	SLED12.1	Oxidative phosphorylation, mitochondrial respiration and proteolysis	DNA replication and repair
GO:0006298.split2	mismatch repair	12	1	SLED12.1	Oxidative phosphorylation, mitochondrial respiration and proteolysis	DNA replication and repair
GO:0010971.split3	positive regulation of G2/M transition of mitotic cell cycle	12	1	SLED12.1	Oxidative phosphorylation, mitochondrial respiration and proteolysis	DNA replication and repair
GO:1900264.split1	positive regulation of DNA-directed DNA polymerase activity	12	1	SLED12.1	Oxidative phosphorylation, mitochondrial respiration and proteolysis	DNA replication and repair
GO:0031391	Elg1 RFC-like complex	12	1	SLED12.1	Oxidative phosphorylation, mitochondrial respiration and proteolysis	DNA replication and repair
R-HSA-174411.split2	Polymerase switching on the C-strand of the telomere	12	1	SLED12.1	Oxidative phosphorylation, mitochondrial respiration and proteolysis	DNA replication and repair
R-HSA-174414.split2	Processive synthesis on the C-strand of the telomere	12	1	SLED12.1	Oxidative phosphorylation, mitochondrial respiration and proteolysis	DNA replication and repair
R-HSA-5656169.split3	Termination of translesion DNA synthesis	12	1	SLED12.1	Oxidative phosphorylation, mitochondrial respiration and proteolysis	DNA replication and repair
R-HSA-5685938.split2	HDR through Single Strand Annealing (SSA)	12	1	SLED12.1	Oxidative phosphorylation, mitochondrial respiration and proteolysis	DNA replication and repair
R-HSA-69190.split2	DNA strand elongation	12	1	SLED12.1	Oxidative phosphorylation, mitochondrial respiration and proteolysis	DNA replication and repair
R-HSA-73933.split2	Resolution of Abasic Sites (AP sites)	12	1	SLED12.1	Oxidative phosphorylation, mitochondrial respiration and proteolysis	DNA replication and repair
hsa03420.split3	Nucleotide excision repair	12	1	SLED12.1	Oxidative phosphorylation, mitochondrial respiration and proteolysis	DNA replication and repair
WP3996.split4	Ethanol effects on histone modifications	12	1	SLED12.1	Oxidative phosphorylation, mitochondrial respiration and proteolysis	DNA replication and repair
WP466.split3	DNA replication	12	1	SLED12.1	Oxidative phosphorylation, mitochondrial respiration and proteolysis	DNA replication and repair
LI.M226.split1	proteasome	12	2	SLED12.2	Oxidative phosphorylation, mitochondrial respiration and proteolysis	Mitochondial Translation, IFN-II
LI.M227.split1	translation initiation	12	2	SLED12.2	Oxidative phosphorylation, mitochondrial respiration and proteolysis	Mitochondial Translation, IFN-II
DC.M5.6.split2	Mitochondrial Stress / Proteasome	12	2	SLED12.2	Oxidative phosphorylation, mitochondrial respiration and proteolysis	Mitochondial Translation, IFN-II
GO:0001682.split3	tRNA 5'-leader removal	12	2	SLED12.2	Oxidative phosphorylation, mitochondrial respiration and proteolysis	Mitochondial Translation, IFN-II
GO:0006744.split3	ubiquinone biosynthetic process	12	2	SLED12.2	Oxidative phosphorylation, mitochondrial respiration and proteolysis	Mitochondial Translation, IFN-II
GO:0016226.split3	iron-sulfur cluster assembly	12	2	SLED12.2	Oxidative phosphorylation, mitochondrial respiration and proteolysis	Mitochondial Translation, IFN-II
GO:0032543.split1	mitochondrial translation	12	2	SLED12.2	Oxidative phosphorylation, mitochondrial respiration and proteolysis	Mitochondial Translation, IFN-II
GO:0045454.split2	cell redox homeostasis	12	2	SLED12.2	Oxidative phosphorylation, mitochondrial respiration and proteolysis	Mitochondial Translation, IFN-II
GO:0050852.split1	T cell receptor signaling pathway	12	2	SLED12.2	Oxidative phosphorylation, mitochondrial respiration and proteolysis	Mitochondial Translation, IFN-II
GO:0097428.split1	protein maturation by iron-sulfur cluster transfer	12	2	SLED12.2	Oxidative phosphorylation, mitochondrial respiration and proteolysis	Mitochondial Translation, IFN-II
GO:0005739.split2	mitochondrion	12	2	SLED12.2	Oxidative phosphorylation, mitochondrial respiration and proteolysis	Mitochondial Translation, IFN-II
GO:0005743.split2	mitochondrial inner membrane	12	2	SLED12.2	Oxidative phosphorylation, mitochondrial respiration and proteolysis	Mitochondial Translation, IFN-II
GO:0005761.split2	mitochondrial ribosome	12	2	SLED12.2	Oxidative phosphorylation, mitochondrial respiration and proteolysis	Mitochondial Translation, IFN-II
GO:0005763.split3	mitochondrial small ribosomal subunit	12	2	SLED12.2	Oxidative phosphorylation, mitochondrial respiration and proteolysis	Mitochondial Translation, IFN-II
GO:0015934.split1	large ribosomal subunit	12	2	SLED12.2	Oxidative phosphorylation, mitochondrial respiration and proteolysis	Mitochondial Translation, IFN-II
GO:0034774.split4	secretory granule lumen	12	2	SLED12.2	Oxidative phosphorylation, mitochondrial respiration and proteolysis	Mitochondial Translation, IFN-II
R-HSA-5368286.split2	Mitochondrial translation initiation	12	2	SLED12.2	Oxidative phosphorylation, mitochondrial respiration and proteolysis	Mitochondial Translation, IFN-II
R-HSA-5368287.split3	Mitochondrial translation	12	2	SLED12.2	Oxidative phosphorylation, mitochondrial respiration and proteolysis	Mitochondial Translation, IFN-II
R-HSA-5389840.split2	Mitochondrial translation elongation	12	2	SLED12.2	Oxidative phosphorylation, mitochondrial respiration and proteolysis	Mitochondial Translation, IFN-II
R-HSA-5389840.split4	Mitochondrial translation elongation	12	2	SLED12.2	Oxidative phosphorylation, mitochondrial respiration and proteolysis	Mitochondial Translation, IFN-II
R-HSA-5419276.split2	Mitochondrial translation termination	12	2	SLED12.2	Oxidative phosphorylation, mitochondrial respiration and proteolysis	Mitochondial Translation, IFN-II
R-HSA-5419276.split4	Mitochondrial translation termination	12	2	SLED12.2	Oxidative phosphorylation, mitochondrial respiration and proteolysis	Mitochondial Translation, IFN-II
R-HSA-69613.split3	p53-Independent G1/S DNA damage checkpoint	12	2	SLED12.2	Oxidative phosphorylation, mitochondrial respiration and proteolysis	Mitochondial Translation, IFN-II
R-HSA-72172.split6	mRNA Splicing	12	2	SLED12.2	Oxidative phosphorylation, mitochondrial respiration and proteolysis	Mitochondial Translation, IFN-II
hsa00630.split1	Glyoxylate and dicarboxylate metabolism	12	2	SLED12.2	Oxidative phosphorylation, mitochondrial respiration and proteolysis	Mitochondial Translation, IFN-II
hsa05010.split8	Alzheimer disease	12	2	SLED12.2	Oxidative phosphorylation, mitochondrial respiration and proteolysis	Mitochondial Translation, IFN-II
hsa05012.split5	Parkinson disease	12	2	SLED12.2	Oxidative phosphorylation, mitochondrial respiration and proteolysis	Mitochondial Translation, IFN-II
hsa05014.split5	Amyotrophic lateral sclerosis	12	2	SLED12.2	Oxidative phosphorylation, mitochondrial respiration and proteolysis	Mitochondial Translation, IFN-II
hsa05022.split6	Pathways of neurodegeneration - multiple diseases	12	2	SLED12.2	Oxidative phosphorylation, mitochondrial respiration and proteolysis	Mitochondial Translation, IFN-II
IFN_II.split7	IFN_II	12	2	SLED12.2	Oxidative phosphorylation, mitochondrial respiration and proteolysis	Mitochondial Translation, IFN-II
M12.1.split1	Protein modification	12	2	SLED12.2	Oxidative phosphorylation, mitochondrial respiration and proteolysis	Mitochondial Translation, IFN-II
M13.13.split1	Gene transcription	12	2	SLED12.2	Oxidative phosphorylation, mitochondrial respiration and proteolysis	Mitochondial Translation, IFN-II
M14.79.split1	Protein synthesis	12	2	SLED12.2	Oxidative phosphorylation, mitochondrial respiration and proteolysis	Mitochondial Translation, IFN-II
LI.M226.split2	proteasome	12	3	SLED12.3	Oxidative phosphorylation, mitochondrial respiration and proteolysis	Proteolysis, cell cycle checkpoint
GO:0016579.split3	protein deubiquitination	12	3	SLED12.3	Oxidative phosphorylation, mitochondrial respiration and proteolysis	Proteolysis, cell cycle checkpoint
GO:0033209.split5	tumor necrosis factor-mediated signaling pathway	12	3	SLED12.3	Oxidative phosphorylation, mitochondrial respiration and proteolysis	Proteolysis, cell cycle checkpoint
GO:0043161.split1	proteasome-mediated ubiquitin-dependent protein catabolic process	12	3	SLED12.3	Oxidative phosphorylation, mitochondrial respiration and proteolysis	Proteolysis, cell cycle checkpoint
GO:0051603.split3	proteolysis involved in cellular protein catabolic process	12	3	SLED12.3	Oxidative phosphorylation, mitochondrial respiration and proteolysis	Proteolysis, cell cycle checkpoint
GO:0090090.split10	negative regulation of canonical Wnt signaling pathway	12	3	SLED12.3	Oxidative phosphorylation, mitochondrial respiration and proteolysis	Proteolysis, cell cycle checkpoint
GO:0000932.split4	P-body	12	3	SLED12.3	Oxidative phosphorylation, mitochondrial respiration and proteolysis	Proteolysis, cell cycle checkpoint
GO:0019773	proteasome core complex, alpha-subunit complex	12	3	SLED12.3	Oxidative phosphorylation, mitochondrial respiration and proteolysis	Proteolysis, cell cycle checkpoint
GO:0022624.split2	proteasome accessory complex	12	3	SLED12.3	Oxidative phosphorylation, mitochondrial respiration and proteolysis	Proteolysis, cell cycle checkpoint
R-HSA-1168372.split5	Downstream signaling events of B Cell Receptor (BCR)	12	3	SLED12.3	Oxidative phosphorylation, mitochondrial respiration and proteolysis	Proteolysis, cell cycle checkpoint
R-HSA-1236978.split3	Cross-presentation of soluble exogenous antigens (endosomes)	12	3	SLED12.3	Oxidative phosphorylation, mitochondrial respiration and proteolysis	Proteolysis, cell cycle checkpoint
R-HSA-174113.split4	SCF-beta-TrCP mediated degradation of Emi1	12	3	SLED12.3	Oxidative phosphorylation, mitochondrial respiration and proteolysis	Proteolysis, cell cycle checkpoint
R-HSA-174143.split5	APC/C-mediated degradation of cell cycle proteins	12	3	SLED12.3	Oxidative phosphorylation, mitochondrial respiration and proteolysis	Proteolysis, cell cycle checkpoint
R-HSA-176408.split5	Regulation of APC/C activators between G1/S and early anaphase	12	3	SLED12.3	Oxidative phosphorylation, mitochondrial respiration and proteolysis	Proteolysis, cell cycle checkpoint
R-HSA-180585.split4	Vif-mediated degradation of APOBEC3G	12	3	SLED12.3	Oxidative phosphorylation, mitochondrial respiration and proteolysis	Proteolysis, cell cycle checkpoint
R-HSA-187577.split3	SCF(Skp2)-mediated degradation of p27/p21	12	3	SLED12.3	Oxidative phosphorylation, mitochondrial respiration and proteolysis	Proteolysis, cell cycle checkpoint
R-HSA-3858494.split7	Beta-catenin independent WNT signaling	12	3	SLED12.3	Oxidative phosphorylation, mitochondrial respiration and proteolysis	Proteolysis, cell cycle checkpoint
R-HSA-4641258.split5	Degradation of DVL	12	3	SLED12.3	Oxidative phosphorylation, mitochondrial respiration and proteolysis	Proteolysis, cell cycle checkpoint
R-HSA-5358346.split3	Hedgehog ligand biogenesis	12	3	SLED12.3	Oxidative phosphorylation, mitochondrial respiration and proteolysis	Proteolysis, cell cycle checkpoint
R-HSA-5358351.split7	Signaling by Hedgehog	12	3	SLED12.3	Oxidative phosphorylation, mitochondrial respiration and proteolysis	Proteolysis, cell cycle checkpoint
R-HSA-5607761.split5	Dectin-1 mediated noncanonical NF-kB signaling	12	3	SLED12.3	Oxidative phosphorylation, mitochondrial respiration and proteolysis	Proteolysis, cell cycle checkpoint
R-HSA-5673001.split8	RAF/MAP kinase cascade	12	3	SLED12.3	Oxidative phosphorylation, mitochondrial respiration and proteolysis	Proteolysis, cell cycle checkpoint
R-HSA-5678895.split4	Defective CFTR causes cystic fibrosis	12	3	SLED12.3	Oxidative phosphorylation, mitochondrial respiration and proteolysis	Proteolysis, cell cycle checkpoint
R-HSA-68827.split5	CDT1 association with the CDC6:ORC:origin complex	12	3	SLED12.3	Oxidative phosphorylation, mitochondrial respiration and proteolysis	Proteolysis, cell cycle checkpoint
R-HSA-68867.split5	Assembly of the pre-replicative complex	12	3	SLED12.3	Oxidative phosphorylation, mitochondrial respiration and proteolysis	Proteolysis, cell cycle checkpoint
R-HSA-69002.split5	DNA Replication Pre-Initiation	12	3	SLED12.3	Oxidative phosphorylation, mitochondrial respiration and proteolysis	Proteolysis, cell cycle checkpoint
R-HSA-69541.split4	Stabilization of p53	12	3	SLED12.3	Oxidative phosphorylation, mitochondrial respiration and proteolysis	Proteolysis, cell cycle checkpoint
R-HSA-69563.split3	p53-Dependent G1 DNA Damage Response	12	3	SLED12.3	Oxidative phosphorylation, mitochondrial respiration and proteolysis	Proteolysis, cell cycle checkpoint
R-HSA-69601.split4	Ubiquitin Mediated Degradation of Phosphorylated Cdc25A	12	3	SLED12.3	Oxidative phosphorylation, mitochondrial respiration and proteolysis	Proteolysis, cell cycle checkpoint
R-HSA-69613.split5	p53-Independent G1/S DNA damage checkpoint	12	3	SLED12.3	Oxidative phosphorylation, mitochondrial respiration and proteolysis	Proteolysis, cell cycle checkpoint
R-HSA-69620.split6	Cell Cycle Checkpoints	12	3	SLED12.3	Oxidative phosphorylation, mitochondrial respiration and proteolysis	Proteolysis, cell cycle checkpoint
R-HSA-9604323.split4	Negative regulation of NOTCH4 signaling	12	3	SLED12.3	Oxidative phosphorylation, mitochondrial respiration and proteolysis	Proteolysis, cell cycle checkpoint
hsa03050.split3	Proteasome	12	3	SLED12.3	Oxidative phosphorylation, mitochondrial respiration and proteolysis	Proteolysis, cell cycle checkpoint
M12.13.split2	Oxidative phosphorylation	12	3	SLED12.3	Oxidative phosphorylation, mitochondrial respiration and proteolysis	Proteolysis, cell cycle checkpoint
M13.14.split2	Proteolysis	12	3	SLED12.3	Oxidative phosphorylation, mitochondrial respiration and proteolysis	Proteolysis, cell cycle checkpoint
LI.M231	respiratory electron transport chain (mitochondrion)	12	4	SLED12.4	Oxidative phosphorylation, mitochondrial respiration and proteolysis	Oxidative phosphorylation, mitochondrial respiratory chain complex I and IV
LI.M238.split1	respiratory electron transport chain (mitochondrion)	12	4	SLED12.4	Oxidative phosphorylation, mitochondrial respiration and proteolysis	Oxidative phosphorylation, mitochondrial respiratory chain complex I and IV
GO:0006091.split5	generation of precursor metabolites and energy	12	4	SLED12.4	Oxidative phosphorylation, mitochondrial respiration and proteolysis	Oxidative phosphorylation, mitochondrial respiratory chain complex I and IV
GO:0006120.split3	mitochondrial electron transport, NADH to ubiquinone	12	4	SLED12.4	Oxidative phosphorylation, mitochondrial respiration and proteolysis	Oxidative phosphorylation, mitochondrial respiratory chain complex I and IV
GO:0032981.split2	mitochondrial respiratory chain complex I assembly	12	4	SLED12.4	Oxidative phosphorylation, mitochondrial respiration and proteolysis	Oxidative phosphorylation, mitochondrial respiratory chain complex I and IV
GO:0005747.split1	mitochondrial respiratory chain complex I	12	4	SLED12.4	Oxidative phosphorylation, mitochondrial respiration and proteolysis	Oxidative phosphorylation, mitochondrial respiratory chain complex I and IV
GO:0005751.split1	mitochondrial respiratory chain complex IV	12	4	SLED12.4	Oxidative phosphorylation, mitochondrial respiration and proteolysis	Oxidative phosphorylation, mitochondrial respiratory chain complex I and IV
GO:0031966.split2	mitochondrial membrane	12	4	SLED12.4	Oxidative phosphorylation, mitochondrial respiration and proteolysis	Oxidative phosphorylation, mitochondrial respiratory chain complex I and IV
GO:0070469.split3	respirasome	12	4	SLED12.4	Oxidative phosphorylation, mitochondrial respiration and proteolysis	Oxidative phosphorylation, mitochondrial respiratory chain complex I and IV
GO:0008137.split3	NADH dehydrogenase (ubiquinone) activity	12	4	SLED12.4	Oxidative phosphorylation, mitochondrial respiration and proteolysis	Oxidative phosphorylation, mitochondrial respiratory chain complex I and IV
R-HSA-1428517.split4	The citric acid (TCA) cycle and respiratory electron transport	12	4	SLED12.4	Oxidative phosphorylation, mitochondrial respiration and proteolysis	Oxidative phosphorylation, mitochondrial respiratory chain complex I and IV
R-HSA-163200.split3	Respiratory electron transport, ATP synthesis by chemiosmotic coupling, and heat production by uncoupling proteins.	12	4	SLED12.4	Oxidative phosphorylation, mitochondrial respiration and proteolysis	Oxidative phosphorylation, mitochondrial respiratory chain complex I and IV
R-HSA-611105.split3	Respiratory electron transport	12	4	SLED12.4	Oxidative phosphorylation, mitochondrial respiration and proteolysis	Oxidative phosphorylation, mitochondrial respiratory chain complex I and IV
R-HSA-6799198.split1	Complex I biogenesis	12	4	SLED12.4	Oxidative phosphorylation, mitochondrial respiration and proteolysis	Oxidative phosphorylation, mitochondrial respiratory chain complex I and IV
hsa00190.split3	Oxidative phosphorylation	12	4	SLED12.4	Oxidative phosphorylation, mitochondrial respiration and proteolysis	Oxidative phosphorylation, mitochondrial respiratory chain complex I and IV
hsa04714.split4	Thermogenesis	12	4	SLED12.4	Oxidative phosphorylation, mitochondrial respiration and proteolysis	Oxidative phosphorylation, mitochondrial respiratory chain complex I and IV
WP4324.split3	Mitochondrial complex I assembly model OXPHOS system	12	4	SLED12.4	Oxidative phosphorylation, mitochondrial respiration and proteolysis	Oxidative phosphorylation, mitochondrial respiratory chain complex I and IV
WP4396.split1	Nonalcoholic fatty liver disease	12	4	SLED12.4	Oxidative phosphorylation, mitochondrial respiration and proteolysis	Oxidative phosphorylation, mitochondrial respiratory chain complex I and IV
GO:0000958	mitochondrial mRNA catabolic process	12	5	SLED12.5	Oxidative phosphorylation, mitochondrial respiration and proteolysis	Mitochondrial mRNA catabolic process
GO:0000962	positive regulation of mitochondrial RNA catabolic process	12	5	SLED12.5	Oxidative phosphorylation, mitochondrial respiration and proteolysis	Mitochondrial mRNA catabolic process
GO:0071042	nuclear polyadenylation-dependent mRNA catabolic process	12	5	SLED12.5	Oxidative phosphorylation, mitochondrial respiration and proteolysis	Mitochondrial mRNA catabolic process
GO:0001676.split1	long-chain fatty acid metabolic process	12	6	SLED12.6	Oxidative phosphorylation, mitochondrial respiration and proteolysis	Oxidative phosphorylation, protein degradation
GO:0008584.split6	male gonad development	12	6	SLED12.6	Oxidative phosphorylation, mitochondrial respiration and proteolysis	Oxidative phosphorylation, protein degradation
GO:0009409.split5	response to cold	12	6	SLED12.6	Oxidative phosphorylation, mitochondrial respiration and proteolysis	Oxidative phosphorylation, protein degradation
GO:0030968.split3	endoplasmic reticulum unfolded protein response	12	6	SLED12.6	Oxidative phosphorylation, mitochondrial respiration and proteolysis	Oxidative phosphorylation, protein degradation
GO:0043248.split2	proteasome assembly	12	6	SLED12.6	Oxidative phosphorylation, mitochondrial respiration and proteolysis	Oxidative phosphorylation, protein degradation
GO:0045047.split2	protein targeting to ER	12	6	SLED12.6	Oxidative phosphorylation, mitochondrial respiration and proteolysis	Oxidative phosphorylation, protein degradation
GO:0005787	signal peptidase complex	12	6	SLED12.6	Oxidative phosphorylation, mitochondrial respiration and proteolysis	Oxidative phosphorylation, protein degradation
GO:0008022.split5	protein C-terminus binding	12	6	SLED12.6	Oxidative phosphorylation, mitochondrial respiration and proteolysis	Oxidative phosphorylation, protein degradation
GO:0009055.split4	electron transfer activity	12	6	SLED12.6	Oxidative phosphorylation, mitochondrial respiration and proteolysis	Oxidative phosphorylation, protein degradation
GO:0016209.split2	antioxidant activity	12	6	SLED12.6	Oxidative phosphorylation, mitochondrial respiration and proteolysis	Oxidative phosphorylation, protein degradation
GO:0071949.split4	FAD binding	12	6	SLED12.6	Oxidative phosphorylation, mitochondrial respiration and proteolysis	Oxidative phosphorylation, protein degradation
R-HSA-400508.split1	Incretin synthesis, secretion, and inactivation	12	6	SLED12.6	Oxidative phosphorylation, mitochondrial respiration and proteolysis	Oxidative phosphorylation, protein degradation
R-HSA-8852135.split5	Protein ubiquitination	12	6	SLED12.6	Oxidative phosphorylation, mitochondrial respiration and proteolysis	Oxidative phosphorylation, protein degradation
hsa03060.split4	Protein export	12	6	SLED12.6	Oxidative phosphorylation, mitochondrial respiration and proteolysis	Oxidative phosphorylation, protein degradation
M12.13.split4	Oxidative phosphorylation	12	6	SLED12.6	Oxidative phosphorylation, mitochondrial respiration and proteolysis	Oxidative phosphorylation, protein degradation
M14.13.split2	Oxidative phosphorylation	12	6	SLED12.6	Oxidative phosphorylation, mitochondrial respiration and proteolysis	Oxidative phosphorylation, protein degradation
M14.16.split3	TBD	12	6	SLED12.6	Oxidative phosphorylation, mitochondrial respiration and proteolysis	Oxidative phosphorylation, protein degradation
M15.70.split4	Protein modification	12	6	SLED12.6	Oxidative phosphorylation, mitochondrial respiration and proteolysis	Oxidative phosphorylation, protein degradation
GO:0006122.split3	mitochondrial electron transport, ubiquinol to cytochrome c	12	7	SLED12.7	Oxidative phosphorylation, mitochondrial respiration and proteolysis	Oxidative phosphorylation, mitochondrial respiratory chain complex III
GO:0005686.split1	U2 snRNP	12	7	SLED12.7	Oxidative phosphorylation, mitochondrial respiration and proteolysis	Oxidative phosphorylation, mitochondrial respiratory chain complex III
GO:0005750.split1	mitochondrial respiratory chain complex III	12	7	SLED12.7	Oxidative phosphorylation, mitochondrial respiration and proteolysis	Oxidative phosphorylation, mitochondrial respiratory chain complex III
GO:1990726	Lsm1-7-Pat1 complex	12	7	SLED12.7	Oxidative phosphorylation, mitochondrial respiration and proteolysis	Oxidative phosphorylation, mitochondrial respiratory chain complex III
[truncated: 3,213 more rows]
