# Supplementary figures and images for: SLE-Diseaseome: A Comprehensive Meta-Database of Systemic Lupus Erythematosus Relevant Functional Pathways
Source: Research Square preprint supplement (doi:10.21203/rs.3.rs-6761810/v1), 2025-06-05

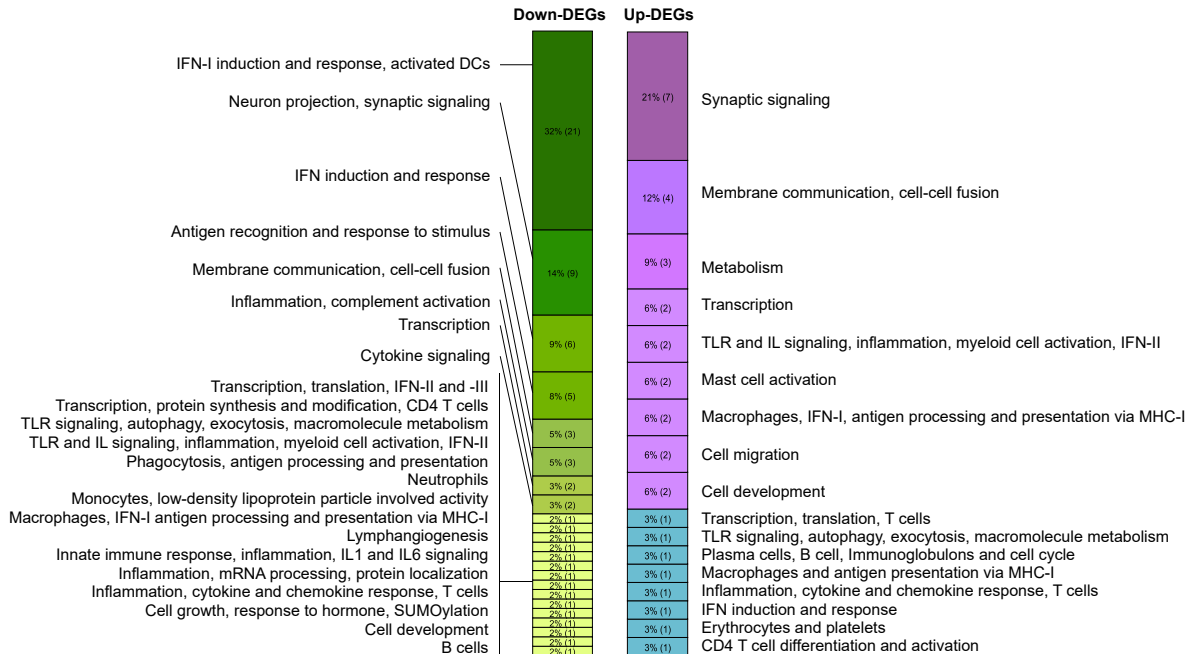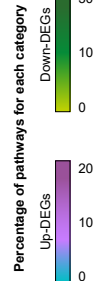

Supplement: Supplementary file 1 [file 90b4db554ec42e3ddd310f85.pdf]

A)

Random-based FPR

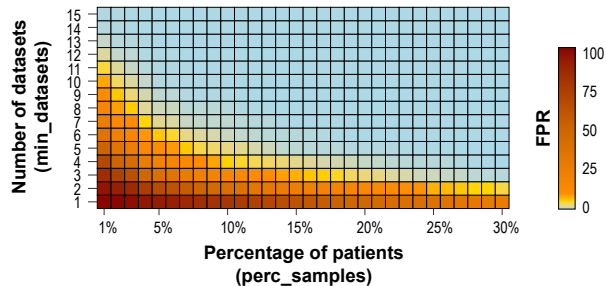

B)

Retained information

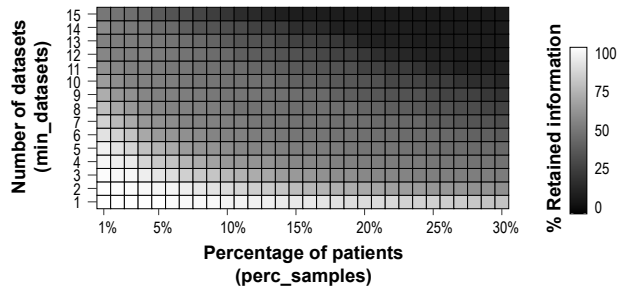

C)

Shannon index

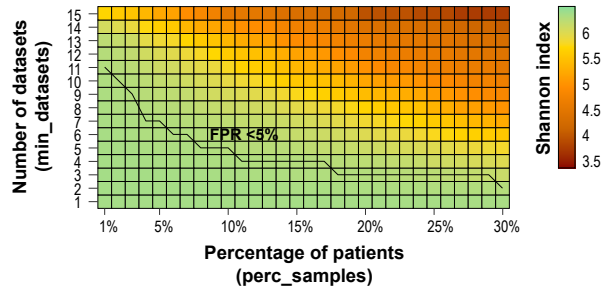

D)

Number of DRGs

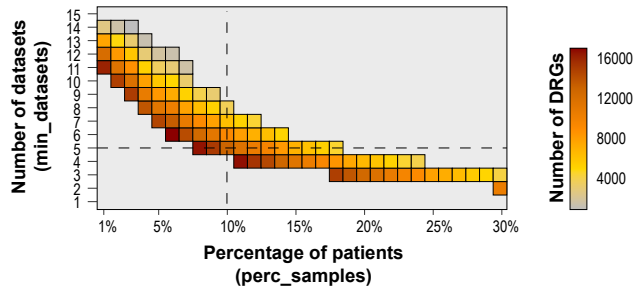

Supplement: Supplementary file 2 [file f2ce407a48f1f2dbfd7c408a.pdf]
